# Supplementary material
Source: HighWire-hosted journal article supplement (doi:10.1101/rna.044578.114)
Supplement: Database_human_5UTR_PG4s_Long_central_loop.xlsx [file Database_human_5UTR_PG4s_Long_central_loop.xlsx]

## Sheet: 5-UTR PG4s Long central loop
Database of human 5'-UTR PG4s possessing a long central loop
UTR				Potential G-quadruplex (PG4)
Gene	RefSeq name	Accession	ID	Position	Length	Nb quartet	Loop 1	Loop 2	Loop 3	G-tract	Length (loop2)
MYADM	NM_001020818	5HSAR003440	BR352126	84	20	4	a	ag	c	gggg	2
GPR137	NM_020155	5HSAR003905	BR353389	117	16	3	a	tg	c	ggg	2
LOC642441	XM_930678	5HSAR004283	BR354560	5438	16	3	c	ag	a	ggg	2
LOC100132163	XM_001720512	5HSAR008977	BR369474	470	16	3	t	gt	t	ggg	2
LOC100132163	XM_001721793	5HSAR009044	BR369752	470	16	3	t	gt	t	ggg	2
PLEKHA3	NM_019091	5HSAR011215	BR376018	304	16	3	c	cc	a	ggg	2
LGI4	NM_139284	5HSAR011678	BR377368	162	16	3	g	tg	g	ggg	2
ANKIB1	NM_019004	5HSAR012438	BR379496	165	16	3	t	tg	c	ggg	2
SHOC2	NM_007373	5HSAR012970	BR381049	7	16	3	a	gc	c	ggg	2
XPO6	NM_015171	5HSAR013991	BR384042	274	16	3	a	gc	t	ggg	2
LRCH1	NM_015116	5HSAR014073	BR384308	203	16	3	c	gt	g	ggg	2
CDS1	NM_001263	5HSAR014790	BR386567	74	16	3	c	gc	a	ggg	2
MARCH4	NM_020814	5HSAR016110	BR390696	137	16	3	c	gt	g	ggg	2
TPPP	NM_007030	5HSAR018221	BR396999	11	16	3	c	ac	c	ggg	2
RUNDC3A	NM_006695	5HSAR018626	BR398198	225	16	3	a	gt	g	ggg	2
RUNDC3A	NM_001144825	5HSAR018626	BR398201	225	16	3	a	gt	g	ggg	2
RUNDC3A	NM_001144826	5HSAR018626	BR398204	225	16	3	a	gt	g	ggg	2
CNTNAP1	NM_003632	5HSAR018645	BR398258	82	16	3	a	aa	t	ggg	2
PPM1A	NM_177951	5HSAR020845	BR403262	107	16	3	a	gg	t	ggg	2
TBC1D12	NM_015188	5HSAR021152	BR403856	55	16	3	t	ag	t	ggg	2
PPM1A	NM_021003	5HSAR021391	BR404324	107	16	3	a	gg	t	ggg	2
RILP	NM_031430	5HSAR022022	BR405543	254	16	3	t	gt	g	ggg	2
EEFSEC	NM_021937	5HSAR022061	BR405619	1	16	3	c	cc	c	ggg	2
PKP4	NM_003628	5HSAR023339	BR408508	128	16	3	a	ag	c	ggg	2
PKP4	NM_001005476	5HSAR023339	BR408515	128	16	3	a	ag	c	ggg	2
ZIC1	NM_003412	5HSAR023968	BR409860	674	16	3	t	gg	c	ggg	2
RNF11	NM_014372	5HSAR024827	BR412044	192	16	3	g	cg	t	ggg	2
RASGRP4	NM_001146202	5HSAR026561	BR417042	64	16	3	t	tg	a	ggg	2
RASGRP4	NM_001146203	5HSAR026561	BR417045	64	16	3	t	tg	a	ggg	2
RASGRP4	NM_001146204	5HSAR026561	BR417049	64	16	3	t	tg	a	ggg	2
RASGRP4	NM_001146205	5HSAR026561	BR417052	64	16	3	t	tg	a	ggg	2
RASGRP4	NM_001146206	5HSAR026561	BR417058	64	16	3	t	tg	a	ggg	2
RASGRP4	NM_001146207	5HSAR026561	BR417061	64	16	3	t	tg	a	ggg	2
RASGRP4	NM_170604	5HSAR026561	BR417107	64	16	3	t	tg	a	ggg	2
S100A6	NM_014624	5HSAR028064	BR421288	172	16	3	c	cg	t	ggg	2
CCM2	NM_031443	5HSAR028405	BR422310	108	16	3	c	cc	c	ggg	2
ELK4	NM_001973	5HSAR029389	BR425298	1017	16	3	c	ga	c	ggg	2
TERF2	NM_005652	5HSAR029634	BR426033	91	16	3	a	cg	a	ggg	2
MAP2K1	NM_002755	5HSAR030330	BR428157	274	16	3	c	tg	c	ggg	2
SSTR1	NM_001049	5HSAR031120	BR430510	535	16	3	t	ga	a	ggg	2
C1orf210	NM_182517	5HSAR000626	BR346764	50	17	3	g	ccg	a	ggg	3
AGTRAP	NM_020350	5HSAR001605	BR349037	28	17	3	c	gcg	c	ggg	3
AGTRAP	NM_001040196	5HSAR001605	BR349056	28	17	3	c	gcg	c	ggg	3
ZNF385D	NM_024697	5HSAR001937	BR349614	71	17	3	t	gtg	t	ggg	3
AGTRAP	NM_001040194	5HSAR001605	BR349846	28	17	3	c	gcg	c	ggg	3
TMEM41B	NM_015012	5HSAR002637	BR350527	9	17	3	c	ccg	c	ggg	3
GTPBP2	NM_019096	5HSAR003454	BR352162	2	17	3	a	gcc	c	ggg	3
AP3S1	NM_001284	5HSAR003465	BR352193	11	17	3	a	ggc	t	ggg	3
AGTRAP	NM_001040195	5HSAR001605	BR352360	28	17	3	c	gcg	c	ggg	3
LOC100131054	XM_001721621	5HSAR007067	BR363591	69	17	3	a	tgc	c	ggg	3
LOC100131054	XM_001725026	5HSAR007211	BR364026	69	17	3	a	tgc	c	ggg	3
LOC100131054	XM_001725841	5HSAR007310	BR364337	69	17	3	a	tgc	c	ggg	3
LOC100132703	XM_001714789	5HSAR007710	BR365679	1243	17	3	a	tgg	t	ggg	3
LOC100128716	XM_001726275	5HSAR008845	BR369054	222	17	3	a	gag	a	ggg	3
LOC100128716	XM_001720920	5HSAR008962	BR369430	222	17	3	a	gag	a	ggg	3
AGTRAP	NM_001040197	5HSAR001605	BR374606	28	17	3	c	gcg	c	ggg	3
STBD1	NM_003943	5HSAR012214	BR378873	64	21	4	c	agc	c	gggg	3
NHLH1	NM_005598	5HSAR012775	BR380646	393	17	3	a	gtg	a	ggg	3
FAM55C	NM_001134456	5HSAR013073	BR381261	171	17	3	c	gcg	c	ggg	3
C3orf59	NM_178496	5HSAR013082	BR381279	257	21	4	c	tgg	c	gggg	3
ZNF213	NM_004220	5HSAR013332	BR381942	58	21	4	c	gcc	c	gggg	3
C16orf11	NM_145270	5HSAR016850	BR392800	164	17	3	c	gag	c	ggg	3
KCNMB4	NM_014505	5HSAR018040	BR396450	405	17	3	c	agg	c	ggg	3
SLC3A2	NM_001013251	5HSAR019171	BR399840	24	17	3	c	ccg	c	ggg	3
UBE2M	NM_003969	5HSAR019997	BR401621	312	17	3	c	gcc	c	ggg	3
SHD	NM_020209	5HSAR020516	BR402615	615	17	3	a	gag	c	ggg	3
CRYBA2	NM_057093	5HSAR021415	BR404372	49	17	3	t	gaa	a	ggg	3
MBNL1	NM_021038	5HSAR021531	BR404595	812	17	3	c	cgg	a	ggg	3
MBNL1	NM_207292	5HSAR021531	BR404632	812	17	3	c	cgg	a	ggg	3
UBE2Q2	NM_001145335	5HSAR021820	BR405157	148	17	3	c	gcg	c	ggg	3
BATF3	NM_018664	5HSAR022000	BR405501	185	17	3	c	gcg	c	ggg	3
ACOX1	NM_004035	5HSAR024033	BR410009	141	17	3	c	ccg	c	ggg	3
TNRC4	NM_007185	5HSAR024035	BR410015	126	17	3	t	ggt	a	ggg	3
FZD10	NM_007197	5HSAR024501	BR411204	337	17	3	c	cat	c	ggg	3
AKTIP	NM_022476	5HSAR025980	BR415324	2	17	3	t	gcg	c	ggg	3
U2AF2	NM_007279	5HSAR027051	BR418535	892	17	3	c	gcg	a	ggg	3
U2AF2	NM_001012478	5HSAR027051	BR418545	892	17	3	c	gcg	a	ggg	3
F11R	NM_016946	5HSAR027094	BR418654	152	17	3	c	gcc	c	ggg	3
CTSB	NM_001908	5HSAR027366	BR419188	2	17	3	c	gcc	a	ggg	3
CTSB	NM_147780	5HSAR027371	BR419201	2	17	3	c	gcc	a	ggg	3
CTSB	NM_147782	5HSAR027381	BR419229	2	17	3	c	gcc	a	ggg	3
ATOH8	NM_032827	5HSAR027759	BR420364	300	17	3	a	gga	c	ggg	3
GRM3	NM_000840	5HSAR028913	BR423835	387	17	3	a	tgg	a	ggg	3
COL1A2	NM_000089	5HSAR029110	BR424421	30	17	3	c	gga	c	ggg	3
ABCC11	NM_033151	5HSAR030199	BR427749	87	17	3	t	ttg	a	ggg	3
CDH2	NM_001792	5HSAR031488	BR431650	307	17	3	t	gag	a	ggg	3
TSPAN32	NM_139022	5HSAR031534	BR431793	95	17	3	a	gaa	a	ggg	3
STOX2	NM_020225	5HSAR000678	BR346859	1260	18	3	g	cgtg	a	ggg	4
ODF3L1	NM_175881	5HSAR000854	BR347169	124	18	3	t	ggat	g	ggg	4
CREBL2	NM_001310	5HSAR001199	BR347932	228	18	3	a	ctcc	a	ggg	4
LOC100134487	XM_001718305	5HSAR005769	BR359257	907	18	3	t	ggag	a	ggg	4
LOC100128524	XM_001717300	5HSAR005882	BR359620	907	18	3	t	ggag	a	ggg	4
LOC100128524	XM_001716075	5HSAR005968	BR359881	907	18	3	t	ggag	a	ggg	4
LOC100128524	XM_001717588	5HSAR006133	BR360441	907	18	3	t	ggag	a	ggg	4
SLC12A8	NM_024628	5HSAR010435	BR373863	16	18	3	c	gacc	c	ggg	4
C7orf46	NM_199136	5HSAR011089	BR375672	18	18	3	a	aacg	c	ggg	4
UBP1	NM_014517	5HSAR011234	BR376072	108	18	3	c	tgac	c	ggg	4
UBP1	NM_001128160	5HSAR011234	BR376075	108	18	3	c	tgac	c	ggg	4
ZBTB5	NM_014872	5HSAR014491	BR385624	47	18	3	t	aggg	c	ggg	4
NADSYN1	NM_018161	5HSAR015156	BR387738	8	18	3	c	gagg	c	ggg	4
OSR2	NM_053001	5HSAR016499	BR391699	46	18	3	a	acgc	c	ggg	4
ZMYM2	NM_003453	5HSAR017155	BR393770	121	18	3	t	ccgg	a	ggg	4
KCNQ3	NM_004519	5HSAR018195	BR396921	79	18	3	g	ggtg	a	ggg	4
SYT5	NM_003180	5HSAR020435	BR402461	170	18	3	t	gtcc	c	ggg	4
GPX4	NM_001039848	5HSAR020966	BR403495	67	18	3	c	agac	c	ggg	4
TRIM45	NM_025188	5HSAR022664	BR406750	220	18	3	c	cggc	a	ggg	4
TRIM45	NM_001145635	5HSAR022664	BR406754	220	18	3	c	cggc	a	ggg	4
SRPK1	NM_003137	5HSAR023471	BR408849	6	18	3	c	ggtg	c	ggg	4
DDX43	NM_018665	5HSAR024206	BR410457	56	18	3	g	tggg	c	ggg	4
CXCL14	NM_004887	5HSAR027090	BR418645	138	18	3	c	cgac	c	ggg	4
ATF4	NM_001675	5HSAR028235	BR421796	520	18	3	c	cggt	c	ggg	4
LOXL2	NM_002318	5HSAR028561	BR422791	24	18	3	t	tccg	a	ggg	4
ZMPSTE24	NM_005857	5HSAR028958	BR423966	73	18	3	a	atgg	c	ggg	4
CAMTA1	NM_015215	5HSAR030327	BR428149	105	18	3	c	gcca	c	ggg	4
ADAR	NM_001025107	5HSAR030974	BR430063	30	18	3	a	tggg	a	ggg	4
GLTPD1	NM_001029885	5HSAR000965	BR347474	18	19	3	c	gcggt	c	ggg	5
KIAA1012	NM_014939	5HSAR001130	BR347746	321	19	3	t	ccgga	c	ggg	5
RBPMS	NM_001008711	5HSAR001523	BR348850	52	19	3	a	gagag	a	ggg	5
RBPMS	NM_006867	5HSAR001523	BR350188	52	19	3	a	gagag	a	ggg	5
RBPMS	NM_001008712	5HSAR001523	BR351073	52	19	3	a	gagag	a	ggg	5
RBPMS	NM_001008710	5HSAR001523	BR352157	52	19	3	a	gagag	a	ggg	5
LOC730456	XM_001715829	5HSAR005180	BR357419	489	19	3	c	ggtga	t	ggg	5
LOC100130155	XM_001720202	5HSAR006180	BR360622	95	19	3	a	aggca	a	ggg	5
LOC100130155	XM_001720219	5HSAR006309	BR361059	95	19	3	a	aggca	a	ggg	5
LOC100130155	XM_001720201	5HSAR006352	BR361229	95	19	3	a	aggca	a	ggg	5
ZNF628	NM_033113	5HSAR009746	BR371893	223	19	3	a	tccgg	c	ggg	5
KPNA4	NM_002268	5HSAR010975	BR375360	122	19	3	c	ggggc	c	ggg	5
HAGHL	NM_207112	5HSAR012653	BR380354	36	19	3	c	ggcgg	c	ggg	5
CBLN1	NM_004352	5HSAR013300	BR381839	308	19	3	t	gggcg	t	ggg	5
PDHX	NM_003477	5HSAR013452	BR382319	273	23	4	c	cgaac	c	gggg	5
MAN2A1	NM_002372	5HSAR014752	BR386453	82	19	3	c	aaaga	a	ggg	5
CYB5R2	NM_016229	5HSAR015398	BR388496	50	19	3	c	gagtg	c	ggg	5
FAM184B	NM_015688	5HSAR015866	BR389937	22	19	3	t	cgcgc	t	ggg	5
BOK	NM_032515	5HSAR015968	BR390253	92	19	3	c	cgccg	c	ggg	5
MRPL38	NM_032478	5HSAR019578	BR400801	122	19	3	c	cctag	c	ggg	5
PITPNA	NM_006224	5HSAR019761	BR401163	208	19	3	c	aggcc	c	ggg	5
NSFL1C	NM_182483	5HSAR019775	BR401192	813	19	3	c	gctgc	c	ggg	5
NSFL1C	NM_016143	5HSAR020001	BR401629	813	19	3	c	gctgc	c	ggg	5
NSFL1C	NM_018839	5HSAR020001	BR401765	813	19	3	c	gctgc	c	ggg	5
SIRPA	NM_001040023	5HSAR020907	BR403385	163	19	3	a	gggaa	g	ggg	5
AKAP12	NM_144497	5HSAR021656	BR404843	87	19	3	t	ggcgt	t	ggg	5
CRTC2	NM_181715	5HSAR022062	BR405620	39	19	3	a	tggca	a	ggg	5
MSI2	NM_138962	5HSAR022320	BR406117	148	19	3	t	ggggc	g	ggg	5
HLF	NM_002126	5HSAR023774	BR409458	95	19	3	a	gggtg	t	ggg	5
C1orf66	NM_015997	5HSAR025356	BR413448	154	19	3	t	ggcgg	c	ggg	5
LIMA1	NM_016357	5HSAR026157	BR415834	21	19	3	c	gtccg	c	ggg	5
SLC18A3	NM_003055	5HSAR026329	BR416353	53	19	3	c	caagc	c	ggg	5
PODNL1	NM_024825	5HSAR026621	BR417223	110	19	3	c	gaagg	t	ggg	5
DNAJC5	NM_025219	5HSAR027367	BR419190	130	19	3	a	cgggc	c	ggg	5
STK10	NM_005990	5HSAR028003	BR421103	73	19	3	c	ggcgg	c	ggg	5
HOXC13	NM_017410	5HSAR028520	BR422669	20	19	3	a	atggg	a	ggg	5
PHACTR3	NM_080672	5HSAR029182	BR424638	54	19	3	t	gtggg	a	ggg	5
ERCC2	NM_001130867	5HSAR029311	BR425021	149	19	3	a	tgaag	t	ggg	5
RAPGEF3	NM_001098531	5HSAR029513	BR425672	168	19	3	a	gaagg	c	ggg	5
NEIL2	NM_145043	5HSAR029793	BR426521	441	19	3	a	ccgga	t	ggg	5
POLDIP2	NM_015584	5HSAR030731	BR429345	112	19	3	c	cgctc	c	ggg	5
MC1R	NM_002386	5HSAR031030	BR430237	714	19	3	a	gtgaa	t	ggg	5
ARHGAP29	NM_004815	5HSAR001927	BR349604	106	20	3	c	gctggc	c	ggg	6
ECHDC3	NM_024693	5HSAR002928	BR351032	1	24	4	c	cgtgcc	c	gggg	6
DCHS1	NM_003737	5HSAR003493	BR352275	2	24	4	a	agggga	a	gggg	6
RAP2C	NM_021183	5HSAR003644	BR352697	49	20	3	t	ggtggg	t	ggg	6
FLJ46552	XM_001724559	5HSAR005428	BR358218	1289	20	3	a	ggatgg	t	ggg	6
LOC100131515	XM_001726837	5HSAR005500	BR358439	633	20	3	a	tgggat	c	ggg	6
LOC100131515	XM_001725571	5HSAR005588	BR358760	633	20	3	a	tgggat	c	ggg	6
FLJ46552	XM_001715559	5HSAR005594	BR358781	1289	20	3	a	ggatgg	t	ggg	6
FLJ46552	XM_001724285	5HSAR005651	BR358960	1289	20	3	a	ggatgg	t	ggg	6
LOC100131515	XM_001722192	5HSAR005669	BR359013	633	20	3	a	tgggat	c	ggg	6
LOC100128952	XM_001718963	5HSAR009012	BR369622	1763	20	3	a	taggat	a	ggg	6
C2orf67	NM_152519	5HSAR009259	BR370476	79	20	3	t	ggaggc	c	ggg	6
SDCCAG3	NM_006643	5HSAR010023	BR372701	99	20	3	c	cgacgg	c	ggg	6
SYCP2L	NM_001040274	5HSAR010252	BR373361	205	20	3	c	ggtctt	c	ggg	6
SELO	NM_031454	5HSAR010645	BR374440	6	20	3	c	gcttcc	c	ggg	6
GDF7	NM_182828	5HSAR011906	BR378009	442	20	3	t	ccagga	g	ggg	6
LRRC32	NM_001128922	5HSAR014446	BR385482	58	20	3	t	acccgg	c	ggg	6
CAMKK1	NM_172207	5HSAR015428	BR388589	21	24	4	c	cggggc	c	gggg	6
CAMKK1	NM_032294	5HSAR015428	BR388690	21	24	4	c	cggggc	c	gggg	6
JOSD1	NM_014876	5HSAR016497	BR391692	155	20	3	t	agggaa	t	ggg	6
GEFT	NM_182947	5HSAR017783	BR395691	431	20	3	t	gggcgc	g	ggg	6
ARRB1	NM_020251	5HSAR019227	BR400002	66	20	3	c	gaccgg	c	ggg	6
ASB2	NM_016150	5HSAR019851	BR401338	270	24	4	a	gaccgg	t	gggg	6
ARID1A	NM_139135	5HSAR019982	BR401590	304	20	3	c	gtggga	g	ggg	6
ARID1A	NM_006015	5HSAR019982	BR401598	304	20	3	c	gtggga	g	ggg	6
PPP1CB	NM_002709	5HSAR020851	BR403272	207	20	3	a	ggtggg	a	ggg	6
KIAA1026	NM_001018000	5HSAR020861	BR403292	112	20	3	c	aggcgg	c	ggg	6
UBE2N	NM_003348	5HSAR021650	BR404830	149	24	4	c	cgcacg	a	gggg	6
STK4	NM_006282	5HSAR022463	BR406398	11	20	3	a	tctgcg	c	ggg	6
BRUNOL6	NM_052840	5HSAR024012	BR409967	288	20	3	a	ctgaca	c	ggg	6
RIMBP3C	NM_001128633	5HSAR024228	BR410506	163	20	3	a	tgcctg	a	ggg	6
RIMBP3	NM_015672	5HSAR024262	BR410597	163	20	3	a	tgcctg	a	ggg	6
MCART1	NM_033412	5HSAR026419	BR416612	135	20	3	a	gaggcg	c	ggg	6
SLC2A3	NM_006931	5HSAR028048	BR421239	14	24	4	t	tggggt	t	gggg	6
EYA2	NM_172110	5HSAR029930	BR426941	157	20	3	c	ggcaga	a	ggg	6
GFRA3	NM_001496	5HSAR031083	BR430392	39	20	3	c	aggcgg	c	ggg	6
EYA2	NM_005244	5HSAR029930	BR431721	157	20	3	c	ggcaga	a	ggg	6
SLC25A17	NM_006358	5HSAR002985	BR351135	18	21	3	c	tttgaga	c	ggg	7
HOXD8	NM_019558	5HSAR003719	BR352907	71	21	3	a	gggcgcg	g	ggg	7
ZNF804B	NM_181646	5HSAR003794	BR353103	170	21	3	c	aggaaag	c	ggg	7
LOC100132093	XM_001714197	5HSAR003955	BR353537	284	21	3	c	ggccggt	c	ggg	7
LOC100132093	XM_001717747	5HSAR004097	BR353981	284	21	3	c	ggccggt	c	ggg	7
LOC100132093	XM_001714075	5HSAR004104	BR354000	284	21	3	c	ggccggt	c	ggg	7
LOC100129701	XM_001724509	5HSAR004797	BR356231	80	21	3	a	tcgggag	g	ggg	7
LOC100129701	XM_001725856	5HSAR004879	BR356508	80	21	3	a	tcgggag	g	ggg	7
LOC100129701	XM_001723786	5HSAR004930	BR356677	80	21	3	a	tcgggag	g	ggg	7
LOC728212	XM_001128268	5HSAR008849	BR369067	468	21	3	t	gggaggg	a	ggg	7
LOC100132029	XM_001719312	5HSAR008856	BR369091	315	21	3	t	gggaggg	a	ggg	7
HOXC4	NM_014620	5HSAR009484	BR371123	196	21	3	a	tggggat	a	ggg	7
HOXC6	NM_153693	5HSAR010729	BR374673	196	21	3	a	tggggat	a	ggg	7
LSM14A	NM_015578	5HSAR012418	BR379439	36	21	3	c	aggctgg	a	ggg	7
VWA1	NM_022834	5HSAR012610	BR380234	106	25	4	a	cctcccg	c	gggg	7
TSKU	NM_015516	5HSAR016880	BR392901	53	21	3	c	gaccggg	c	ggg	7
PARD6A	NM_016948	5HSAR017624	BR395221	1	21	3	c	gcggcgc	c	ggg	7
CYP26A1	NM_057157	5HSAR021062	BR403686	51	21	3	t	accgggc	a	ggg	7
SGCB	NM_000232	5HSAR023872	BR409621	13	21	3	c	cacagtc	c	ggg	7
C6orf106	NM_024294	5HSAR024961	BR412380	45	21	3	g	gtgggag	g	ggg	7
C6orf106	NM_022758	5HSAR024961	BR412430	45	21	3	g	gtgggag	g	ggg	7
HDAC4	NM_006037	5HSAR025357	BR413451	500	21	3	c	ggcgcgg	t	ggg	7
CREM	NM_183013	5HSAR029349	BR425123	80	21	3	a	gaggacg	c	ggg	7
CREM	NM_182850	5HSAR029677	BR426166	80	21	3	a	gaggacg	c	ggg	7
CREM	NM_001881	5HSAR029712	BR426276	80	21	3	a	gaggacg	c	ggg	7
HDAC11	NM_001136041	5HSAR029911	BR426886	75	21	3	c	gacggcc	c	ggg	7
MTTP	NM_000253	5HSAR030646	BR429134	24	25	4	a	tttatgc	c	gggg	7
DZIP1	NM_014934	5HSAR001401	BR348523	44	26	4	a	gcgggagg	t	gggg	8
CCDC53	NM_016053	5HSAR001813	BR349467	99	22	3	c	ccccatct	a	ggg	8
PSME4	NM_014614	5HSAR001939	BR349616	22	22	3	t	agggggtg	g	ggg	8
DZIP1	NM_198968	5HSAR001401	BR350115	44	26	4	a	gcgggagg	t	gggg	8
LOC653631	XM_001725626	5HSAR003935	BR353481	130	22	3	c	aggggacg	t	ggg	8
LOC653631	XM_930476	5HSAR004059	BR353852	130	22	3	c	aggggacg	t	ggg	8
LOC653631	XM_001726789	5HSAR004134	BR354082	130	22	3	c	aggggacg	t	ggg	8
GPR160	NM_014373	5HSAR012992	BR381094	138	22	3	c	gcggggcg	c	ggg	8
ACAP2	NM_012287	5HSAR013672	BR383015	39	22	3	c	aggaagag	c	ggg	8
ACOT7	NM_007274	5HSAR014887	BR386870	255	26	4	t	ccggcgcg	c	gggg	8
PTPN12	NM_002835	5HSAR014912	BR386949	39	22	3	c	cgggcggc	g	ggg	8
AIDA	NM_022831	5HSAR015864	BR389932	176	22	3	c	aggggacg	t	ggg	8
ACADSB	NM_001609	5HSAR016137	BR390781	25	22	3	c	tactgagt	c	ggg	8
SERINC2	NM_178865	5HSAR016325	BR391146	50	26	4	c	ccggggcc	a	gggg	8
FAM8A1	NM_016255	5HSAR016799	BR392645	56	22	3	a	gccattgg	a	ggg	8
EBAG9	NM_198120	5HSAR018885	BR398963	195	22	3	c	cggggagg	a	ggg	8
PBX2	NM_002586	5HSAR020794	BR403167	227	22	3	a	gcggagca	a	ggg	8
MLLT3	NM_004529	5HSAR023698	BR409382	199	22	3	g	cggaggag	g	ggg	8
MGAT1	NM_001114618	5HSAR024318	BR410746	52	22	3	a	ggcaacag	t	ggg	8
IFNGR2	NM_005534	5HSAR024768	BR411885	199	22	3	g	gtcaggag	t	ggg	8
HNF4A	NM_178849	5HSAR026016	BR415451	25	22	3	c	ggccttcg	t	ggg	8
HNF4A	NM_178850	5HSAR026016	BR415471	25	22	3	c	ggccttcg	t	ggg	8
ZEB1	NM_030751	5HSAR027455	BR419449	1	22	3	g	aaggggga	a	ggg	8
WRN	NM_000553	5HSAR029940	BR426972	480	26	4	t	caggaacg	c	gggg	8
TAPT1	NM_153365	5HSAR030014	BR427190	1	22	3	c	gcgaggcg	a	ggg	8
S100A2	NM_005978	5HSAR030405	BR428389	136	22	3	a	agggggct	a	ggg	8
C22orf13	NM_031444	5HSAR000495	BR346532	94	27	4	c	cctaaggag	c	gggg	9
ZBTB1	NM_014950	5HSAR009875	BR372268	62	23	3	t	cgggcgaga	a	ggg	9
C11orf84	NM_138471	5HSAR012118	BR378603	107	23	3	a	ggctgcgcg	c	ggg	9
C19orf12	NM_031448	5HSAR012372	BR379314	139	23	3	t	ccaggaccg	a	ggg	9
PPP2CB	NM_001009552	5HSAR014935	BR387017	347	23	3	c	tggggaggg	a	ggg	9
C9orf68	NM_001039395	5HSAR015990	BR390321	50	23	3	a	acctgggct	g	ggg	9
LYNX1	NM_177477	5HSAR016123	BR390736	46	23	3	c	ctgttccgg	c	ggg	9
MAPRE2	NM_014268	5HSAR018343	BR397365	14	23	3	c	gccgcagga	c	ggg	9
RABAC1	NM_006423	5HSAR019446	BR400541	1	23	3	t	gccggcgtc	c	ggg	9
CPXM2	NM_198148	5HSAR020536	BR402654	73	23	3	a	aagaaggaa	c	ggg	9
SLC17A7	NM_020309	5HSAR021139	BR403832	116	23	3	c	gggatcggc	g	ggg	9
CEBPE	NM_001805	5HSAR021554	BR404642	146	23	3	c	gagccgagg	c	ggg	9
ESD	NM_001984	5HSAR022218	BR405918	26	23	3	c	gcatcatat	c	ggg	9
IGSF1	NM_001555	5HSAR023236	BR408244	20	23	3	c	ccggcaggc	c	ggg	9
IGSF1	NM_205833	5HSAR023236	BR408258	20	23	3	c	ccggcaggc	c	ggg	9
IFNGR2	NM_005534	5HSAR024768	BR411885	450	23	3	c	acggggcgg	c	ggg	9
TNXB	NM_032470	5HSAR025358	BR413454	152	23	3	a	aaaggccct	a	ggg	9
ZNF384	NM_133476	5HSAR026283	BR416209	6	23	3	a	cagcaagga	g	ggg	9
ZNF384	NM_001039918	5HSAR026283	BR416293	6	23	3	a	cagcaagga	g	ggg	9
ING1	NM_198219	5HSAR026981	BR418321	332	27	4	c	ccgttgccg	a	gggg	9
CAPN10	NM_023089	5HSAR030019	BR427204	68	23	3	c	gaacgggcg	c	ggg	9
COMT	NM_000754	5HSAR030659	BR429174	122	23	3	c	tccagtccc	c	ggg	9
HOXB9	NM_024017	5HSAR030932	BR429932	75	23	3	a	tggggggct	g	ggg	9
NRG1	NM_013959	5HSAR031466	BR431588	29	23	3	t	gtggaggca	c	ggg	9
PSD	NM_002779	5HSAR001738	BR349309	328	24	3	a	actgagaggc	c	ggg	10
RNF150	NM_020724	5HSAR002060	BR349737	614	24	3	a	cgcgggggcg	a	ggg	10
ZFAND2B	NM_138802	5HSAR003702	BR352859	43	24	3	c	ggagaggaag	c	ggg	10
LOC729439	XM_001723745	5HSAR005567	BR358697	32	24	3	a	aggtgtcgga	c	ggg	10
LOC100127940	XM_001720481	5HSAR005702	BR359101	520	24	3	g	tggggtgcgt	t	ggg	10
LOC100127940	XM_001714084	5HSAR005944	BR359811	520	24	3	g	tggggtgcgt	t	ggg	10
LOC728844	XM_001133051	5HSAR007084	BR363646	8	24	3	t	aggtggtggt	t	ggg	10
LOC728844	XM_001721844	5HSAR007192	BR363964	8	24	3	t	aggtggtggt	t	ggg	10
LOC728844	XM_001133058	5HSAR007290	BR364272	8	24	3	t	aggtggtggt	t	ggg	10
C6orf124	NM_001042508	5HSAR010312	BR373538	32	24	3	a	aggtgtcgga	c	ggg	10
RABGEF1	NM_014504	5HSAR011358	BR376425	26	24	3	c	gcgagcagga	t	ggg	10
PLEKHB1	NM_001130034	5HSAR011838	BR377820	15	24	3	t	caggtccgga	c	ggg	10
NXNL2	NM_145283	5HSAR012324	BR379184	5	24	3	c	gcgcagttgg	a	ggg	10
SLC27A4	NM_005094	5HSAR013131	BR381379	96	24	3	c	gccgggcggc	c	ggg	10
MYCL1	NM_001033081	5HSAR013357	BR382023	66	24	3	a	cgcgcgcgcg	g	ggg	10
RPP25	NM_017793	5HSAR015653	BR389281	598	28	4	a	cctggcggca	c	gggg	10
SMPD4	NM_017751	5HSAR015741	BR389561	245	24	3	c	cggggggaag	g	ggg	10
SMPD4	NM_017951	5HSAR015741	BR389567	245	24	3	c	cggggggaag	g	ggg	10
C8orf84	NM_153225	5HSAR018543	BR397956	51	24	3	a	gcggcgcgga	c	ggg	10
UBE2L6	NM_004223	5HSAR019560	BR400764	2	28	4	t	tccccggggc	c	gggg	10
HSD17B1	NM_000413	5HSAR022325	BR406127	889	28	4	t	gcccgcaggc	c	gggg	10
CPT2	NM_000098	5HSAR025401	BR413590	286	24	3	c	gcctactagt	c	ggg	10
LOC26010	NM_001100422	5HSAR025736	BR414568	193	24	3	t	aaaggagcta	a	ggg	10
LOC26010	NM_001100424	5HSAR025736	BR414627	193	24	3	t	aaaggagcta	a	ggg	10
PRKCH	NM_006255	5HSAR026333	BR416366	111	24	3	a	agggaaggag	a	ggg	10
HSPA1L	NM_005527	5HSAR028937	BR423902	43	24	3	a	acggggtggg	t	ggg	10
EPHB6	NM_004445	5HSAR030181	BR427699	21	24	3	a	gacgcggagg	c	ggg	10
KAT2B	NM_003884	5HSAR031198	BR430758	329	24	3	c	agggcgtggg	a	ggg	10
ELL3	NM_025165	5HSAR001160	BR347825	274	25	3	c	ttcctggcgga	t	ggg	11
TDRD7	NM_014290	5HSAR001313	BR348265	44	29	4	c	ccgagcagggc	c	gggg	11
LOC728944	XM_001128859	5HSAR004357	BR354797	90	25	3	c	ggctggggcgg	c	ggg	11
PPP2R1B	NM_181699	5HSAR009462	BR371059	28	25	3	c	gcctgggcgcg	c	ggg	11
LASS2	NM_022075	5HSAR009930	BR372428	211	25	3	c	cgcgggccggc	c	ggg	11
LASS2	NM_181746	5HSAR009931	BR372431	211	25	3	c	cgcgggccggc	c	ggg	11
SSFA2	NM_006751	5HSAR012110	BR378580	27	25	3	t	gagcaggggcc	c	ggg	11
SSFA2	NM_001130445	5HSAR012110	BR378582	27	25	3	t	gagcaggggcc	c	ggg	11
ASCL2	NM_005170	5HSAR012801	BR380702	244	25	3	a	cgaagcgtggc	a	ggg	11
NMB	NM_021077	5HSAR013557	BR382649	258	25	3	a	tggggacggcg	a	ggg	11
PLEKHF2	NM_024613	5HSAR014241	BR384838	4	25	3	c	ttcgactggag	c	ggg	11
UGT8	NM_001128174	5HSAR015483	BR388760	235	25	3	c	gcgcggctggg	c	ggg	11
CHSY1	NM_014918	5HSAR015738	BR389551	379	25	3	c	ctggcctccgc	c	ggg	11
RHOBTB1	NM_014836	5HSAR016577	BR391950	30	25	3	t	ggcaggcgaag	a	ggg	11
TRMT1	NM_001142554	5HSAR016595	BR392006	21	25	3	a	attcggactcg	c	ggg	11
THAP4	NM_015963	5HSAR018560	BR398006	34	25	3	c	ggctggggcgg	c	ggg	11
ADRBK2	NM_005160	5HSAR020490	BR402569	14	25	3	c	ggcgcgcggag	g	ggg	11
HIRA	NM_003325	5HSAR020864	BR403299	102	25	3	c	cggcggccgga	c	ggg	11
SEC63	NM_007214	5HSAR021080	BR403719	37	25	3	a	aaaactgagcg	c	ggg	11
SIN3A	NM_001145358	5HSAR021900	BR405312	21	25	3	c	gtcgggggagt	c	ggg	11
ABHD11	NM_148916	5HSAR021908	BR405329	1	25	3	c	gctgcgagcta	c	ggg	11
ABHD11	NM_148913	5HSAR021908	BR405589	1	25	3	c	gctgcgagcta	c	ggg	11
ABHD11	NM_148912	5HSAR021908	BR405756	1	25	3	c	gctgcgagcta	c	ggg	11
STAT5B	NM_012448	5HSAR023019	BR407674	82	25	3	a	agcgagcgggc	c	ggg	11
LRPAP1	NM_002337	5HSAR023049	BR407751	13	25	3	t	ggcggggtagt	c	ggg	11
N4BP1	NM_153029	5HSAR025177	BR412930	97	25	3	c	cggcggggcgc	c	ggg	11
PRPF40B	NM_012272	5HSAR000128	BR345813	138	30	4	c	actgggggcgaa	c	gggg	12
FAM70A	NM_017938	5HSAR000743	BR346977	41	26	3	a	agaagagtggaa	a	ggg	12
LOC100134430	XM_001714510	5HSAR006518	BR361785	446	26	3	c	cggtccccaggc	c	ggg	12
H2AFY	NM_138609	5HSAR009404	BR370898	59	26	3	c	aagcgaagaggc	c	ggg	12
KCTD11	NM_001002914	5HSAR009454	BR371037	206	30	4	c	gcggggcgccaa	c	gggg	12
FAM70A	NM_001104544	5HSAR000743	BR373429	41	26	3	a	agaagagtggaa	a	ggg	12
PGM5	NM_021965	5HSAR010559	BR374204	58	26	3	c	cggtccccaggc	c	ggg	12
CDC16	NM_003903	5HSAR011000	BR375431	25	26	3	t	gggtgcgggtgt	t	ggg	12
CDC16	NM_001078645	5HSAR011000	BR375437	25	26	3	t	gggtgcgggtgt	t	ggg	12
FAM43B	NM_207334	5HSAR012817	BR380735	12	30	4	a	agaagagggcaa	a	gggg	12
AFAP1	NM_198595	5HSAR013121	BR381358	20	26	3	c	acggcgggcggc	c	ggg	12
SIRT5	NM_031244	5HSAR014089	BR384361	2	26	3	a	aggcaccccggg	c	ggg	12
AKIRIN2	NM_018064	5HSAR017592	BR395128	28	26	3	t	agagttctacga	a	ggg	12
MYOD1	NM_002478	5HSAR017922	BR396092	75	26	3	a	gtgggggacagt	t	ggg	12
CLN3	NM_000086	5HSAR022593	BR406604	94	26	3	c	ggagagtacgat	t	ggg	12
VSNL1	NM_003385	5HSAR023473	BR408852	57	26	3	a	aagagaggaaag	a	ggg	12
ARL6IP6	NM_152522	5HSAR024354	BR410835	129	26	3	a	aagttgtagtac	t	ggg	12
RARA	NM_001024809	5HSAR024435	BR411032	37	30	4	a	gcgcgcagagct	t	gggg	12
PKP2	NM_004572	5HSAR028043	BR421223	2	30	4	c	ccggactcgagc	c	gggg	12
NEIL2	NM_145043	5HSAR029793	BR426521	181	26	3	a	gacaggaaggga	c	ggg	12
HSPD1	NM_002156	5HSAR029988	BR427108	14	26	3	c	agtagaggcgga	a	ggg	12
EN1	NM_001426	5HSAR030907	BR429852	951	30	4	t	agcgaggcggtg	c	gggg	12
RAP2C	NM_021183	5HSAR003644	BR352697	29	35	5	t	tgggggtgggggt	t	ggggg	13
LOC100132952	XM_001715776	5HSAR006413	BR361445	1299	27	3	t	gctgaagcctagg	t	ggg	13
C8orf42	NM_175075	5HSAR014624	BR386033	395	27	3	c	cctggtggggagg	c	ggg	13
MGEA5	NM_012215	5HSAR016476	BR391624	298	27	3	a	ggaagggcagagg	a	ggg	13
PLSCR1	NM_021105	5HSAR017302	BR394229	58	27	3	a	gcctcacaccagg	t	ggg	13
AP1S1	NM_001283	5HSAR018740	BR398534	2	27	3	c	gcttcgggcgaga	a	ggg	13
FAM78B	NM_001017961	5HSAR018749	BR398561	230	27	3	c	gggctccggcccg	t	ggg	13
PSME3	NM_176863	5HSAR021904	BR405320	62	27	3	c	cggacggcacaga	a	ggg	13
PSME3	NM_005789	5HSAR021904	BR405440	62	27	3	c	cggacggcacaga	a	ggg	13
LOC26010	NM_001100423	5HSAR025746	BR414599	5	27	3	c	ggcagcctgcgag	c	ggg	13
YAP1	NM_001130145	5HSAR026416	BR416603	181	27	3	c	ggcggaggcgccg	c	ggg	13
YAP1	NM_006106	5HSAR026416	BR416644	181	27	3	c	ggcggaggcgccg	c	ggg	13
SMARCA4	NM_003072	5HSAR027019	BR418436	85	27	3	g	cggtggccgaggc	c	ggg	13
SMARCA4	NM_001128844	5HSAR027026	BR418456	85	27	3	g	cggtggccgaggc	c	ggg	13
S100A6	NM_014624	5HSAR028064	BR421288	161	27	3	c	acttgggcgggcg	t	ggg	13
LMO4	NM_006769	5HSAR028129	BR421492	352	27	3	c	ggcgggggccccc	c	ggg	13
FZD2	NM_001466	5HSAR028765	BR423412	92	27	3	g	gcgccaaggagcc	t	ggg	13
REV3L	NM_002912	5HSAR029013	BR424127	203	31	4	a	gccgtgccgagaa	a	gggg	13
STAT5A	NM_003152	5HSAR029563	BR425825	417	27	3	a	agcaagcggggct	a	ggg	13
WRN	NM_000553	5HSAR029940	BR426972	498	27	3	c	gacggcgctggag	c	ggg	13
ARID4B	NM_016374	5HSAR001502	BR348789	4	28	3	g	aacctagagtcggt	g	ggg	14
ARID4B	NM_031371	5HSAR001502	BR349755	4	28	3	g	aacctagagtcggt	g	ggg	14
CTGLF6	XM_001716810	5HSAR006655	BR362242	1315	28	3	a	cattgtgaagtgtg	t	ggg	14
CTGLF7	XM_001714786	5HSAR006659	BR362254	1315	28	3	a	cattgtgaagtgtg	t	ggg	14
LOC100133472	XM_001714530	5HSAR006750	BR362566	873	28	3	a	cattgtgaagtgtg	t	ggg	14
LOC650155	XM_939236	5HSAR006765	BR362623	1665	28	3	a	cattgtgaagtgtg	t	ggg	14
TRIM41	NM_033549	5HSAR009778	BR371986	369	32	4	c	ccaggaagtgagga	c	gggg	14
TRIM41	NM_201627	5HSAR009778	BR371996	369	32	4	c	ccaggaagtgagga	c	gggg	14
PTCHD3	NM_001034842	5HSAR011792	BR377687	12	28	3	t	gccaggagagcgtt	t	ggg	14
SPOPL	NM_001001664	5HSAR012672	BR380409	62	28	3	g	tgggggctgcgcgg	c	ggg	14
KIF16B	NM_024704	5HSAR015946	BR390188	46	28	3	c	ggcgagagggaagt	c	ggg	14
POTEC	NM_001137671	5HSAR016397	BR391373	269	28	3	t	tgtgggttttccct	t	ggg	14
2008-09-01	NM_015146	5HSAR017083	BR393551	35	28	3	c	gaggccggtcccgc	c	ggg	14
2008-09-01	NM_001098811	5HSAR017083	BR393568	35	28	3	c	gaggccggtcccgc	c	ggg	14
PNMA2	NM_007257	5HSAR017323	BR394297	27	28	3	a	aaggagagagagag	a	ggg	14
RAB43	NM_198490	5HSAR017672	BR395361	92	28	3	c	agccagccggggtg	c	ggg	14
MXD3	NM_031300	5HSAR018106	BR396654	331	28	3	c	gcgtcccgggggcg	c	ggg	14
MXD3	NM_001142935	5HSAR018106	BR396657	331	28	3	c	gcgtcccgggggcg	c	ggg	14
BAG1	NM_004323	5HSAR020772	BR403126	9	28	3	c	gctgggaagtagtc	c	ggg	14
KIRREL	NM_018240	5HSAR021346	BR404234	277	28	3	c	cgcgggcgggcggg	c	ggg	14
RHBDF1	NM_022450	5HSAR022069	BR405632	9	28	3	c	ccggaccggcgggc	c	ggg	14
EGLN2	NM_080732	5HSAR022091	BR405674	21	32	4	c	cgtcgcgcgcggtg	c	gggg	14
TFE3	NM_006521	5HSAR023482	BR408868	35	28	3	g	cgtcggtccgttct	c	ggg	14
SH2B3	NM_005475	5HSAR027106	BR418685	219	28	3	c	agaggacgcgccca	c	ggg	14
ZDHHC15	NM_144969	5HSAR027468	BR419493	176	28	3	t	gaggaggcagaaag	a	ggg	14
SGCE	NM_003919	5HSAR028312	BR422030	49	28	3	a	aagaagaaagggag	a	ggg	14
HAND2	NM_021973	5HSAR029331	BR425073	354	28	3	a	gaagaggcgggaag	a	ggg	14
YY1	NM_003403	5HSAR031021	BR430208	184	28	3	c	aggaggcgcggcca	c	ggg	14
SET	NM_001122821	5HSAR031177	BR430690	55	28	3	t	tgggatgaggctgg	a	ggg	14
ZNF219	NM_016423	5HSAR001751	BR349336	186	33	4	a	gcgggggccgggccg	c	gggg	15
CMTM6	NM_017801	5HSAR002704	BR350641	4	29	3	c	gcgggccaagggcgg	c	ggg	15
ZNF213	NM_004220	5HSAR013332	BR381942	46	33	4	c	gcgggggcgggggcc	c	gggg	15
DUSP18	NM_152511	5HSAR015730	BR389526	176	29	3	c	taacaggttgagcca	t	ggg	15
CD63	NM_001780	5HSAR018966	BR399214	72	29	3	c	gccgcgcggcaggcg	c	ggg	15
CD63	NM_001040034	5HSAR018966	BR399226	72	29	3	c	gccgcgcggcaggcg	c	ggg	15
G6PC3	NM_138387	5HSAR019408	BR400466	96	29	3	c	gcctggggctcagag	t	ggg	15
EPB41L2	NM_001431	5HSAR020432	BR402455	6	29	3	a	gcttccgccgcgagg	c	ggg	15
EPB41L2	NM_001135554	5HSAR020432	BR402465	6	29	3	a	gcttccgccgcgagg	c	ggg	15
PVRL2	NM_001042724	5HSAR020819	BR403214	83	33	4	c	tcagaacgccaggag	c	gggg	15
PVRL2	NM_002856	5HSAR020819	BR403229	83	33	4	c	tcagaacgccaggag	c	gggg	15
PDPK1	NM_002613	5HSAR023013	BR407661	6	29	3	c	gggcggcgggcgacg	c	ggg	15
CYP4F11	NM_021187	5HSAR024039	BR410024	109	29	3	a	gactgcccaaggttg	t	ggg	15
DDX43	NM_018665	5HSAR024206	BR410457	190	29	3	c	atagagagcgtgggc	g	ggg	15
PCNT	NM_006031	5HSAR025059	BR412624	6	29	3	a	cgagcccaagcgcgg	a	ggg	15
DDX6	NM_004397	5HSAR025875	BR415003	68	29	3	c	cgaacgggcgagcga	a	ggg	15
MSX1	NM_002448	5HSAR031545	BR431826	93	29	3	a	gcgggaggcgcgcgc	a	ggg	15
C15orf17	NM_020447	5HSAR000661	BR346829	284	30	3	c	gttgcaccatccggca	c	ggg	16
GLTPD1	NM_001029885	5HSAR000965	BR347474	7	30	3	c	gcgagggcggggcggt	c	ggg	16
PPP1R14B	NM_138689	5HSAR001528	BR348863	55	30	3	c	cggatcggcggggagg	c	ggg	16
BCL9L	NM_182557	5HSAR003516	BR352342	274	34	4	c	tgggggtgcagggcgg	a	gggg	16
LOC100133486	XM_001719610	5HSAR009221	BR370363	507	30	3	c	cgagaggctctcaact	c	ggg	16
FJX1	NM_014344	5HSAR012218	BR378883	140	34	4	c	agcggaggcggaggag	a	gggg	16
KCNK1	NM_002245	5HSAR013684	BR383059	61	30	3	c	agccaggcccgggcgg	c	ggg	16
DNPEP	NM_012100	5HSAR015124	BR387645	100	30	3	c	gcaggcggcgcggtgg	c	ggg	16
ANKRD13A	NM_033121	5HSAR015938	BR390164	28	30	3	c	aacgccgcggggcgcg	t	ggg	16
CD63	NM_001780	5HSAR018966	BR399214	46	34	4	a	accgtggctggagccc	c	gggg	16
CD63	NM_001040034	5HSAR018966	BR399226	46	34	4	a	accgtggctggagccc	c	gggg	16
NLGN2	NM_020795	5HSAR019096	BR399611	31	30	3	g	gggtcccagggaggga	g	ggg	16
WDR13	NM_017883	5HSAR019748	BR401137	204	34	4	a	cgttgctatggcgact	a	gggg	16
PIAS1	NM_016166	5HSAR020323	BR402247	12	30	3	c	gccaggccggctagag	c	ggg	16
CD2AP	NM_012120	5HSAR021596	BR404726	160	30	3	t	aaaaccgcggtcgggc	c	ggg	16
GCA	NM_012198	5HSAR021657	BR404846	6	30	3	c	gctggcctgcggaagg	c	ggg	16
KIF3A	NM_007054	5HSAR021918	BR405349	118	30	3	c	gacgtccgccgggcac	a	ggg	16
CLDN5	NM_001130861	5HSAR022348	BR406173	711	30	3	t	gctgggggcggctgcc	c	ggg	16
GSTZ1	NM_145871	5HSAR025511	BR413899	14	30	3	a	ccggccggcccggggc	g	ggg	16
HSPA6	NM_002155	5HSAR025861	BR414961	167	30	3	c	cgagaggctctcaact	c	ggg	16
KDM4D	NM_018039	5HSAR027697	BR420175	4	30	3	c	gccgaagcggcccagg	c	ggg	16
2009-09-01	NM_001113493	5HSAR028335	BR422096	92	34	4	c	cgggggcgcagcgcgc	a	gggg	16
PHACTR3	NM_080672	5HSAR029182	BR424638	43	30	3	g	tggggggtggggtggg	a	ggg	16
DRAP1	NM_006442	5HSAR002423	BR350161	1	31	3	c	agcggcggtccagactg	a	ggg	17
C7orf28B	XM_001720226	5HSAR005957	BR359845	78	31	3	a	tcccgaggtgggggtcg	c	ggg	17
KIAA0746	NM_015187	5HSAR009468	BR371076	68	31	3	c	cgggaaggtggcgcctc	c	ggg	17
SLITRK4	NM_173078	5HSAR009597	BR371449	38	35	4	t	gggggtggtggagagcg	c	gggg	17
ZNF706	NM_001042510	5HSAR010749	BR374729	14	31	3	c	gctgcgaggagcaggcg	c	ggg	17
FAM149B1	NM_173348	5HSAR011580	BR377098	113	31	3	a	gccgggccggagccggc	a	ggg	17
GDF7	NM_182828	5HSAR011906	BR378009	431	31	3	c	ggtggggtgggccagga	g	ggg	17
APPL1	NM_012096	5HSAR016922	BR393032	57	31	3	c	ccggggtcagctgcggc	c	ggg	17
THRA	NM_003250	5HSAR017029	BR393378	392	31	3	t	tggcctgtgggtgtgcc	g	ggg	17
HOXC8	NM_022658	5HSAR017730	BR395533	124	31	3	c	gtactcgtgagccagag	a	ggg	17
THRA	NM_199334	5HSAR017733	BR395542	489	31	3	t	tggcctgtgggtgtgcc	g	ggg	17
ANKRD40	NM_052855	5HSAR018247	BR397080	206	31	3	c	gcggggcaggcgggcct	c	ggg	17
JUND	NM_005354	5HSAR022312	BR406100	45	31	3	c	cgcagggccgagcggac	g	ggg	17
DENND5A	NM_015213	5HSAR023046	BR407742	163	31	3	a	gcggcctgagggcggac	c	ggg	17
RHOQ	NM_012249	5HSAR023319	BR408453	79	31	3	c	cgcggcgaccggggccg	c	ggg	17
CPT1B	NM_152247	5HSAR024969	BR412402	517	31	3	c	gcggggccggcctggcc	a	ggg	17
IRS2	NM_003749	5HSAR029493	BR425612	401	31	3	c	cggccgggcgcaagggt	a	ggg	17
CD44	NM_000610	5HSAR031425	BR431459	132	31	3	c	ggcagaggggcccgccc	a	ggg	17
CD44	NM_001001389	5HSAR031425	BR431482	132	31	3	c	ggcagaggggcccgccc	a	ggg	17
CD44	NM_001001390	5HSAR031425	BR431506	132	31	3	c	ggcagaggggcccgccc	a	ggg	17
CD44	NM_001001391	5HSAR031425	BR431531	132	31	3	c	ggcagaggggcccgccc	a	ggg	17
CD44	NM_001001392	5HSAR031425	BR431554	132	31	3	c	ggcagaggggcccgccc	a	ggg	17
PSME4	NM_014614	5HSAR001939	BR349616	12	32	3	a	ttcgggtgggagggggtg	g	ggg	18
FBXW11	NM_033644	5HSAR001988	BR349665	222	32	3	a	cggagctgccggcggccc	c	ggg	18
FBXW11	NM_033645	5HSAR001988	BR350893	222	32	3	a	cggagctgccggcggccc	c	ggg	18
ELL2	NM_012081	5HSAR003023	BR351203	154	32	3	c	gcgcggggccggagggtg	c	ggg	18
MAGIX	NM_001099680	5HSAR003171	BR351469	97	32	3	t	gccaaggggcgcgacttg	c	ggg	18
RAP2C	NM_021183	5HSAR003644	BR352697	37	32	3	t	ggtgggggtgggggtggg	t	ggg	18
LOC100134328	XM_001717526	5HSAR008198	BR367065	1177	32	3	t	gcacaccattcaaagaag	a	ggg	18
PHF23	NM_024297	5HSAR010309	BR373528	189	36	4	a	ggcgccggaccgggagga	a	gggg	18
CYP4X1	NM_178033	5HSAR015393	BR388480	159	32	3	t	cgaccctacgccagctcc	c	ggg	18
LRRC27	NM_001143757	5HSAR018255	BR397106	4	32	3	c	gacgcggcaggtgagacg	c	ggg	18
FBXW11	NM_012300	5HSAR001988	BR397248	222	32	3	a	cggagctgccggcggccc	c	ggg	18
EMP3	NM_001425	5HSAR020376	BR402347	145	32	3	a	tgaaaggagggaggagaa	c	ggg	18
PKP4	NM_003628	5HSAR023339	BR408508	112	32	3	c	ggccggtgggggagggag	c	ggg	18
PKP4	NM_001005476	5HSAR023339	BR408515	112	32	3	c	ggccggtgggggagggag	c	ggg	18
CASP9	NM_001229	5HSAR024815	BR412011	8	32	3	c	ggcgggtcctggggactg	c	ggg	18
CASP9	NM_032996	5HSAR024815	BR412047	8	32	3	c	ggcgggtcctggggactg	c	ggg	18
UBTF	NM_001076684	5HSAR025481	BR413818	41	32	3	a	cgccgccactcagagcca	a	ggg	18
TEAD1	NM_021961	5HSAR026355	BR416427	321	32	3	a	agccgggcaccgagcaga	c	ggg	18
CUL4B	NM_001079872	5HSAR027279	BR419058	28	32	3	g	agagagatcgaaaagcag	a	ggg	18
ANTXR2	NM_058172	5HSAR027488	BR419556	348	32	3	g	acttcagccctccaggcg	t	ggg	18
ANTXR2	NM_001145794	5HSAR027488	BR419568	348	32	3	g	acttcagccctccaggcg	t	ggg	18
STRA6	NM_022369	5HSAR029141	BR424513	54	32	3	a	gctcaagggagcccagct	a	ggg	18
TCEA2	NM_198723	5HSAR002795	BR350799	379	33	3	a	aaagttcttcagctgccga	c	ggg	19
SLC35F5	NM_025181	5HSAR003489	BR352262	136	37	4	c	ccgcgcggagggcaagccg	c	gggg	19
LOC650770	XM_001718594	5HSAR009245	BR370430	270	33	3	t	tgtgggttttccctgggtg	t	ggg	19
EMX1	NM_004097	5HSAR010059	BR372802	341	33	3	c	cgggggaggtgaggggtgc	c	ggg	19
LRRC1	NM_018214	5HSAR010409	BR373808	42	33	3	t	agtggaggcaccggctggc	c	ggg	19
UCK1	NM_031432	5HSAR014682	BR386232	35	33	3	c	cgcgccgggcctggggaag	c	ggg	19
MAN2A1	NM_002372	5HSAR014752	BR386453	224	33	3	a	ggaaggtaggggcggcggg	c	ggg	19
PIGP	NM_153682	5HSAR015170	BR387783	35	33	3	a	tcgttgtgcgcctgcgcca	t	ggg	19
POTEB	NM_207355	5HSAR016405	BR391395	182	33	3	t	tgtgggttttccctgggtg	t	ggg	19
DMTF1	NM_001142326	5HSAR016524	BR391782	17	33	3	a	gcagcgtgcggggagctgg	c	ggg	19
FMO5	NM_001461	5HSAR018663	BR398310	165	33	3	a	agaatgggtgccgctgagt	c	ggg	19
FMO5	NM_001144830	5HSAR018666	BR398318	165	33	3	a	agaatgggtgccgctgagt	c	ggg	19
G6PC3	NM_138387	5HSAR019408	BR400466	67	37	4	c	cttggtggtgaccgctggc	c	gggg	19
PPFIBP1	NM_003622	5HSAR019904	BR401437	11	33	3	a	aggagagaagggcggcagt	a	ggg	19
PPFIBP1	NM_177444	5HSAR019904	BR402345	11	33	3	a	aggagagaagggcggcagt	a	ggg	19
C12orf75	NM_001145199	5HSAR022813	BR407136	1	33	3	t	tccggcgggtccccgggcg	c	ggg	19
HNF4A	NM_178849	5HSAR026016	BR415451	14	33	3	a	cggagggcgggggccttcg	t	ggg	19
HNF4A	NM_178850	5HSAR026016	BR415471	14	33	3	a	cggagggcgggggccttcg	t	ggg	19
CAV2	NM_001233	5HSAR030305	BR428086	182	33	3	c	gaggggcggcggggcgccg	c	ggg	19
CAV2	NM_198212	5HSAR030305	BR428103	182	33	3	c	gaggggcggcggggcgccg	c	ggg	19
HOXB9	NM_024017	5HSAR030932	BR429932	65	33	3	t	ggtgggagggtggggggct	g	ggg	19
GPR157	NM_024980	5HSAR003331	BR351825	1	34	3	c	ggagcggccggacgcgggcg	c	ggg	20
LOC100131054	XM_001721621	5HSAR007067	BR363591	52	34	3	c	gacctcgcacgggagggtgc	c	ggg	20
LOC100131054	XM_001725026	5HSAR007211	BR364026	52	34	3	c	gacctcgcacgggagggtgc	c	ggg	20
LOC100131054	XM_001725841	5HSAR007310	BR364337	52	34	3	c	gacctcgcacgggagggtgc	c	ggg	20
EFEMP2	NM_016938	5HSAR011444	BR376661	32	34	3	t	ccgcgccgcggcaggcgggc	c	ggg	20
NOTO	NM_001134462	5HSAR013208	BR381548	135	34	3	t	catttttaaaagcggaggaa	a	ggg	20
C3orf23	NM_173826	5HSAR014293	BR384997	96	34	3	a	tgttgggggcaggtggagcc	a	ggg	20
CYB5R2	NM_016229	5HSAR015398	BR388496	35	34	3	c	accgcgaagggcggggagtg	c	ggg	20
TFCP2	NM_005653	5HSAR017561	BR395038	16	34	3	a	aggggtcctccagcagaaag	c	ggg	20
ANKRD40	NM_052855	5HSAR018247	BR397080	104	34	3	c	cgcgggcagcggcgcgagca	c	ggg	20
CLK2	NM_003993	5HSAR028693	BR423190	152	34	3	c	aggtcccagggtcccgggtt	g	ggg	20
WRN	NM_000553	5HSAR029940	BR426972	468	38	4	c	aaaggggtggggcaggaacg	c	gggg	20
TPI1	NM_001159287	5HSAR031489	BR431654	1	34	3	c	gggcagggctccgggggact	c	ggg	20
KIAA1305	NM_025081	5HSAR003605	BR352585	278	35	3	c	cgcccgagccgtgcggggagc	c	ggg	21
LASS2	NM_022075	5HSAR009930	BR372428	201	35	3	a	cgagggcgggcgcgggccggc	c	ggg	21
LASS2	NM_181746	5HSAR009931	BR372431	201	35	3	a	cgagggcgggcgcgggccggc	c	ggg	21
C11orf84	NM_138471	5HSAR012118	BR378603	95	35	3	c	cggcggggagggggctgcgcg	c	ggg	21
UHRF1BP1	NM_017754	5HSAR012769	BR380633	29	35	3	c	cggccgcggcgccgcgctggt	t	ggg	21
RABGGTA	NM_004581	5HSAR015141	BR387693	69	35	3	c	ggtgcccgggagccgtgggac	c	ggg	21
NAB1	NM_005966	5HSAR020429	BR402450	39	35	3	c	aagaagcggcgggcccgaggt	g	ggg	21
KCNIP1	NM_014592	5HSAR021323	BR404186	106	35	3	a	gagccgagtgtgcggcaggag	c	ggg	21
KIRREL	NM_018240	5HSAR021346	BR404234	35	35	3	a	aggcaggcaggcagggaggca	a	ggg	21
CHD1L	NM_004284	5HSAR021664	BR404859	14	35	3	a	aggtgcgcgcttggccgcgcg	c	ggg	21
KCNIP1	NM_001034837	5HSAR021323	BR404993	106	35	3	a	gagccgagtgtgcggcaggag	c	ggg	21
RRM2B	NM_015713	5HSAR023801	BR409485	104	39	4	c	ccggccgagtccctagagctg	c	gggg	21
NEDD4L	NM_001144970	5HSAR024368	BR410871	90	35	3	t	tggctgcgcagggccctacct	c	ggg	21
ERLIN2	NM_001003790	5HSAR024633	BR411543	238	35	3	c	gaaggggcgcgagtgacctcg	a	ggg	21
ADAP2	NM_018404	5HSAR027103	BR418678	135	35	3	a	gcggacagtcctgacggtgcg	c	ggg	21
MAF	NM_005360	5HSAR029537	BR425750	619	35	3	c	cgcggggggcgcgggcagggc	g	ggg	21
MAF	NM_001031804	5HSAR029537	BR425762	619	35	3	c	cgcggggggcgcgggcagggc	g	ggg	21
RNF31	NM_017999	5HSAR030905	BR429846	141	35	3	t	cctcaaagccgggcaccagac	a	ggg	21
OGG1	NM_002542	5HSAR031060	BR430323	75	35	3	c	agaagataagtcgcaaggagg	c	ggg	21
OGG1	NM_016820	5HSAR031060	BR430370	75	35	3	c	agaagataagtcgcaaggagg	c	ggg	21
OGG1	NM_016826	5HSAR031060	BR430396	75	35	3	c	agaagataagtcgcaaggagg	c	ggg	21
OGG1	NM_016827	5HSAR031060	BR430422	75	35	3	c	agaagataagtcgcaaggagg	c	ggg	21
OGG1	NM_016828	5HSAR031060	BR430457	75	35	3	c	agaagataagtcgcaaggagg	c	ggg	21
ATP5S	NM_015684	5HSAR001175	BR347866	223	36	3	c	attacggtgaaaattcttgttt	c	ggg	22
ATP5S	NM_001003803	5HSAR001175	BR347900	223	36	3	c	attacggtgaaaattcttgttt	c	ggg	22
PRRT2	NM_145239	5HSAR001576	BR348977	49	40	4	c	gcggcgacggcggcggagcgta	a	gggg	22
RNF44	NM_014901	5HSAR001603	BR349032	338	36	3	t	gaggggagcacattgttccgca	c	ggg	22
ATP5S	NM_001003805	5HSAR001175	BR351430	223	36	3	c	attacggtgaaaattcttgttt	c	ggg	22
MTA3	NM_020744	5HSAR009458	BR371048	175	36	3	c	gctcggctcgggctccgcgggc	c	ggg	22
LARP1	NM_033551	5HSAR011075	BR375632	141	36	3	t	ggcgtcttgcgaggaacgggcg	g	ggg	22
FBXL7	NM_012304	5HSAR014215	BR384754	367	36	3	g	atgtgcagctaacggtcccgtc	c	ggg	22
CSNK1G1	NM_022048	5HSAR015419	BR388562	177	36	3	t	tagagaagcacttggcgcctcg	a	ggg	22
LRP5L	NM_182492	5HSAR015781	BR389683	1943	36	3	c	aagggtgagcccctgcaaggtg	t	ggg	22
2002-09-01	NM_004404	5HSAR016951	BR393129	37	36	3	c	ctgtgagcggaccgcgagcgct	c	ggg	22
2002-09-01	NM_001008492	5HSAR016965	BR393178	37	36	3	c	ctgtgagcggaccgcgagcgct	c	ggg	22
SPNS1	NM_001142448	5HSAR020540	BR402661	88	36	3	t	atcgtcggtgggaccggagcgc	c	ggg	22
GPX4	NM_001039848	5HSAR020966	BR403495	49	36	3	t	ggagccaggaggggcgggagac	c	ggg	22
SCAP	NM_012235	5HSAR021419	BR404379	11	36	3	c	cacccggcggccaggagagaga	a	ggg	22
HOOK1	NM_015888	5HSAR023253	BR408288	43	36	3	a	ggcgaacgctggagcgaggcgg	c	ggg	22
EN1	NM_001426	5HSAR030907	BR429852	132	36	3	a	acgcgggtgcgggcgcgggtgg	a	ggg	22
SYNCRIP	NM_006372	5HSAR031548	BR431836	296	36	3	a	gagggaagggaagggaagggaa	g	ggg	22
SYNCRIP	NM_001159677	5HSAR031548	BR431935	296	36	3	a	gagggaagggaagggaagggaa	g	ggg	22
LANCL3	NM_198511	5HSAR000076	BR345690	22	37	3	c	ttcagcgagggcgcagcctctga	g	ggg	23
FLJ45079	NM_001001685	5HSAR000082	BR345705	957	41	4	c	cctgctgaccttgacagcaatca	a	gggg	23
LAGE3	NM_006014	5HSAR001394	BR348504	256	37	3	c	gcttcgggaaggagccacagaga	c	ggg	23
CLDND1	NM_001040183	5HSAR001495	BR348769	89	37	3	c	cggaggcgcgggagttatggagg	c	ggg	23
BTF3	NM_001037637	5HSAR001635	BR349098	181	37	3	c	aagttccctgaaggagcgagaca	a	ggg	23
ISLR	NM_005545	5HSAR001852	BR349529	101	37	3	a	cacaggcctgcacatcgaaggtg	t	ggg	23
CLDND1	NM_001040181	5HSAR002429	BR350170	89	37	3	c	cggaggcgcgggagttatggagg	c	ggg	23
CLDND1	NM_001040182	5HSAR003425	BR352084	89	37	3	c	cggaggcgcgggagttatggagg	c	ggg	23
CLDND1	NM_001040199	5HSAR003536	BR352394	89	37	3	c	cggaggcgcgggagttatggagg	c	ggg	23
LOC100132093	XM_001714197	5HSAR003955	BR353537	9	37	3	c	ggcggtccctccggggacggggc	t	ggg	23
LOC100132093	XM_001717747	5HSAR004097	BR353981	9	37	3	c	ggcggtccctccggggacggggc	t	ggg	23
LOC100132093	XM_001714075	5HSAR004104	BR354000	9	37	3	c	ggcggtccctccggggacggggc	t	ggg	23
SMTNL2	NM_198501	5HSAR009256	BR370467	12	37	3	a	gacagcgcgtagtcgcagagtca	a	ggg	23
CLDND1	NM_001040200	5HSAR003425	BR374659	89	37	3	c	cggaggcgcgggagttatggagg	c	ggg	23
STRADB	NM_018571	5HSAR013643	BR382922	27	37	3	a	aggcggggccgcgaccccggcgc	t	ggg	23
LOC730130	NM_001136002	5HSAR014801	BR386600	199	37	3	c	cggcacctcgcccgggactggaa	a	ggg	23
ZNF451	NM_001031623	5HSAR015777	BR389671	116	37	3	c	tcccggtagcgccaggcggtgca	c	ggg	23
ZNF451	NM_015555	5HSAR015777	BR389695	116	37	3	c	tcccggtagcgccaggcggtgca	c	ggg	23
ACADSB	NM_001609	5HSAR016137	BR390781	10	37	3	g	tgtgtgcggggcgggtactgagt	c	ggg	23
KIAA1586	NM_020931	5HSAR016413	BR391421	62	37	3	c	tcccggtagcgcgaggcggtgca	c	ggg	23
BCAN	NM_021948	5HSAR020251	BR402106	87	41	4	c	gcggccccggggagggcggggca	c	gggg	23
CACYBP	NM_014412	5HSAR021138	BR403830	142	37	3	t	gctaggctcggcgaggcgaggaa	t	ggg	23
SPIN1	NM_006717	5HSAR021163	BR403879	26	37	3	c	cggcgtccgcggcgagggagcgg	c	ggg	23
NSF	NM_006178	5HSAR021429	BR404398	19	37	3	c	cggcgggggcgcgcgcgcggcgg	c	ggg	23
PMVK	NM_006556	5HSAR021915	BR405344	27	37	3	c	gctggactgttctaagtgagttc	t	ggg	23
BMP7	NM_001719	5HSAR025804	BR414786	353	41	4	c	gtccgggcagagcgcggccggcc	a	gggg	23
AUTS2	NM_015570	5HSAR027118	BR418723	284	37	3	c	gggcgcggcggagaatggccgcg	a	ggg	23
AUTS2	NM_001127231	5HSAR027118	BR418733	284	37	3	c	gggcgcggcggagaatggccgcg	a	ggg	23
AUTS2	NM_001127232	5HSAR027118	BR418742	284	37	3	c	gggcgcggcggagaatggccgcg	a	ggg	23
FZD2	NM_001466	5HSAR028765	BR423412	82	37	3	c	ggcggggggggcgccaaggagcc	t	ggg	23
MAPK3	NM_002746	5HSAR030886	BR429785	53	37	3	c	gccgccgtggggaggagggcggt	a	ggg	23
MAPK3	NM_001040056	5HSAR030886	BR429798	53	37	3	c	gccgccgtggggaggagggcggt	a	ggg	23
KAT2B	NM_003884	5HSAR031198	BR430758	316	37	3	t	cgaagggggcgggagggcgtggg	a	ggg	23
MAPK3	NM_001109891	5HSAR030886	BR430905	53	37	3	c	gccgccgtggggaggagggcggt	a	ggg	23
STK11	NM_000455	5HSAR031399	BR431372	299	41	4	c	cgcgcgctcgggcagacgtttgc	a	gggg	23
GLTPD1	NM_001029885	5HSAR000965	BR347474	144	38	3	a	gacgtcgtcctagagggccggagc	c	ggg	24
LOC100131178	XM_001718060	5HSAR008378	BR367589	127	38	3	a	cctggggcacctgggctgagctgt	a	ggg	24
LOC100131178	XM_001721798	5HSAR008434	BR367761	127	38	3	a	cctggggcacctgggctgagctgt	a	ggg	24
LOC100131178	XM_001721775	5HSAR008463	BR367848	127	38	3	a	cctggggcacctgggctgagctgt	a	ggg	24
RASGRP2	NM_001098670	5HSAR010576	BR374255	21	38	3	c	agccgcagccgcagcgaggccggc	c	ggg	24
C8orf42	NM_175075	5HSAR014624	BR386033	384	38	3	a	tttggggcgggcctggtggggagg	c	ggg	24
NXPH3	NM_007225	5HSAR016717	BR392386	128	38	3	c	gtcggccctgggcgacccgctgag	a	ggg	24
UGP2	NM_001001521	5HSAR017766	BR395639	100	38	3	g	ttagcagctgggctgcgaccgtta	a	ggg	24
NAGA	NM_000262	5HSAR018138	BR396749	97	38	3	a	ggctctgcggttttggggagccca	c	ggg	24
NUCKS1	NM_022731	5HSAR020222	BR402048	178	38	3	g	gtggggcgccgagcgcgcggggtg	g	ggg	24
ELOVL2	NM_017770	5HSAR021230	BR404005	19	38	3	c	tgtgcgcgcgccgggcgtgggtgt	t	ggg	24
GPR83	NM_016540	5HSAR022066	BR405628	121	38	3	a	gacgcccggcccgcaggctcccag	a	ggg	24
MPDU1	NM_004870	5HSAR024690	BR411690	73	38	3	t	tagcgtcagaaagagcggggcacg	c	ggg	24
S100A6	NM_014624	5HSAR028064	BR421288	150	38	3	t	gcgcgggcgggacttgggcgggcg	t	ggg	24
ATP2A2	NM_001135765	5HSAR030325	BR428144	208	38	3	c	gcctctgatcgcctcaagagagcg	a	ggg	24
ATP2A2	NM_170665	5HSAR030325	BR430413	208	38	3	c	gcctctgatcgcctcaagagagcg	a	ggg	24
ATP2A2	NM_001681	5HSAR030325	BR430443	208	38	3	c	gcctctgatcgcctcaagagagcg	a	ggg	24
C16orf72	NM_014117	5HSAR000386	BR346324	159	43	4	c	gtcgtccctggttgcacggggccgc	c	gggg	25
HOMEZ	NM_020834	5HSAR002273	BR349950	32	39	3	g	gcagtcccggtttcggccatcgctg	t	ggg	25
HS3ST4	NM_006040	5HSAR018022	BR396397	147	39	3	g	ccacccggactcggcgggcagcgtg	c	ggg	25
SLC25A13	NM_014251	5HSAR018899	BR399007	4	39	3	c	cagcatccacatgacccgcgccggc	a	ggg	25
TDRD7	NM_014290	5HSAR001313	BR348265	29	44	4	c	cgaagcggggcggggccgagcagggc	c	gggg	26
ZNF219	NM_016423	5HSAR001751	BR349336	172	48	5	c	accggggagggggcgggggccgggcc	c	ggggg	26
LOC642755	XM_001732876	5HSAR007608	BR365343	54	40	3	g	agggggacgctaggacctgcggggcc	c	ggg	26
LOC642755	XM_926382	5HSAR007719	BR365705	54	40	3	g	agggggacgctaggacctgcggagcc	c	ggg	26
HEXDC	NM_173620	5HSAR010159	BR373087	275	40	3	c	gctcagagcggaggcggcggccgcga	c	ggg	26
APCDD1	NM_153000	5HSAR011220	BR376030	75	40	3	c	acgcggggccgggcgcggagaagtcg	c	ggg	26
FOSL2	NM_005253	5HSAR013408	BR382181	514	40	3	a	accgagagacgcgccgactttttaga	a	ggg	26
C16orf48	NM_032140	5HSAR014135	BR384504	191	40	3	a	ggcccggggttggggaagggggcccg	a	ggg	26
XPR1	NM_004736	5HSAR014355	BR385195	3	40	3	c	gctatggagaggaggaggaagatggc	c	ggg	26
2004-03-01	NM_020814	5HSAR016110	BR390696	703	40	3	a	cgccacggatttgccgactgcagcag	t	ggg	26
PIAS1	NM_016166	5HSAR020323	BR402247	2	40	3	c	ccggggcggggccaggccggctagag	c	ggg	26
CAPN1	NM_005186	5HSAR021671	BR404873	10	40	3	a	cggagggcggaggggcggcgggagga	c	ggg	26
ST6GALNAC2	NM_006456	5HSAR022339	BR406156	114	40	3	c	caggcgccgcaggcacccggcgggca	c	ggg	26
KAT	NM_001113205	5HSAR022864	BR407277	15	40	3	a	aacgggagatgttgcaggcgccgaga	c	ggg	26
KAT	NM_001113207	5HSAR022864	BR407348	15	40	3	a	aacgggagatgttgcaggcgccgaga	c	ggg	26
VLDLR	NM_003383	5HSAR023129	BR407969	190	40	3	t	tggggaggagactgtgcaagttgtag	a	ggg	26
IGSF1	NM_001555	5HSAR023236	BR408244	3	40	3	a	gaggaggttggggcgggccggcaggc	c	ggg	26
IGSF1	NM_205833	5HSAR023236	BR408258	3	40	3	a	gaggaggttggggcgggccggcaggc	c	ggg	26
ACCN2	NM_001095	5HSAR023793	BR409477	23	40	3	c	cggacagatcggagccgagcggggcc	c	ggg	26
ACCN2	NM_020039	5HSAR023793	BR409633	23	40	3	c	cggacagatcggagccgagcggggcc	c	ggg	26
XAGE2	NM_130777	5HSAR024274	BR410629	5	40	3	a	gagggaggactgcatgacgcgggatg	t	ggg	26
U2AF2	NM_007279	5HSAR027051	BR418535	869	40	3	c	tgagggggcggagcccgggcggggcg	a	ggg	26
U2AF2	NM_001012478	5HSAR027051	BR418545	869	40	3	c	tgagggggcggagcccgggcggggcg	a	ggg	26
LRP1	NM_002332	5HSAR030514	BR428729	188	44	4	a	gaaagagcagcgaggagtgaagcggg	t	gggg	26
DHFR	NM_000791	5HSAR030830	BR429615	373	44	4	c	cctcgcctgcacaaatggggacgagg	c	gggg	26
FGF11	NM_004112	5HSAR001289	BR348196	97	41	3	g	ggtctggggcttatcctcaggtcctgt	t	ggg	27
LOC152586	XM_001725473	5HSAR005011	BR356894	8	41	3	c	tgtgctggggacccacgcggcaccgcg	a	ggg	27
LOC152586	XM_001720248	5HSAR005215	BR357523	8	41	3	c	tgtgctggggacccacgcggcaccgcg	a	ggg	27
LOC648576	XM_001720207	5HSAR009199	BR370297	53	41	3	c	ggtcggggctgcaggcggggcagggct	t	ggg	27
LGI4	NM_139284	5HSAR011678	BR377368	551	41	3	t	ccgggagaagcgggtgcctcagagtgg	t	ggg	27
PSD2	NM_032289	5HSAR014048	BR384228	47	41	3	c	cgcgggcagctccgaccggcggcggcg	c	ggg	27
NXPH3	NM_007225	5HSAR016717	BR392386	91	45	4	a	ggcggcggctgcacagctggaccgaag	c	gggg	27
PNMA2	NM_007257	5HSAR017323	BR394297	14	41	3	a	ctggaggggagggaaggagagagagag	a	ggg	27
SLC37A2	NM_198277	5HSAR021772	BR405066	103	41	3	c	cgctgccgtactcaggccgcggggcca	c	ggg	27
SLC37A2	NM_001145290	5HSAR021772	BR405070	103	41	3	c	cgctgccgtactcaggccgcggggcca	c	ggg	27
TTC9	NM_015351	5HSAR024235	BR410527	83	41	3	c	agcgggcggcgcggagccgggaggcgg	a	ggg	27
PAX7	NM_001135254	5HSAR025289	BR413246	438	41	3	t	gggtgggggtagggagtgtgtgtggag	a	ggg	27
PAX7	NM_013945	5HSAR025289	BR413273	438	41	3	t	gggtgggggtagggagtgtgtgtggag	a	ggg	27
PAX7	NM_002584	5HSAR025289	BR413299	438	41	3	t	gggtgggggtagggagtgtgtgtggag	a	ggg	27
HDAC11	NM_001136041	5HSAR029911	BR426886	55	41	3	c	cgcgctagggcgagggcggggacggcc	c	ggg	27
PRPF40B	NM_012272	5HSAR000128	BR345813	125	42	3	a	gggatgggggcggggactgggggcgaag	c	ggg	28
C6orf204	NM_206921	5HSAR000327	BR346196	46	42	3	c	aggatggagacagagggatgcggcggga	c	ggg	28
WDR59	NM_030581	5HSAR000385	BR346322	57	42	3	t	agggcgccgtcctggggccgcggcggcc	c	ggg	28
PLEKHA6	NM_014935	5HSAR000758	BR347000	120	46	4	c	gaggaggaccccagctggcctgagctgg	a	gggg	28
LOC100134487	XM_001718305	5HSAR005769	BR359257	880	46	4	a	gcgcctccgccggaacgcgggtggggga	a	gggg	28
LOC100128524	XM_001717300	5HSAR005882	BR359620	880	46	4	a	gcgcctccgccggaacgcgggtggggga	a	gggg	28
C7orf28B	XM_001720226	5HSAR005957	BR359845	67	42	3	c	ccgtgggagggtcccgaggtgggggtcg	c	ggg	28
LOC100128524	XM_001716075	5HSAR005968	BR359881	880	46	4	a	gcgcctccgccggaacgcgggtggggga	a	gggg	28
LOC652200	XM_001716208	5HSAR006120	BR360400	67	42	3	c	ccgtgggaggctcccgaggtgggggccg	c	ggg	28
LOC100128524	XM_001717588	5HSAR006133	BR360441	880	46	4	a	gcgcctccgccggaacgcgggtggggga	a	gggg	28
C6orf204	NM_001042475	5HSAR000327	BR373804	46	42	3	c	aggatggagacagagggatgcggcggga	c	ggg	28
PATZ1	NM_014323	5HSAR011306	BR376279	610	42	3	a	ggcgggcaggtgcagcggccgggctagt	a	ggg	28
PATZ1	NM_032050	5HSAR011306	BR376284	610	42	3	a	ggcgggcaggtgcagcggccgggctagt	a	ggg	28
PATZ1	NM_032051	5HSAR011306	BR376290	610	42	3	a	ggcgggcaggtgcagcggccgggctagt	a	ggg	28
PATZ1	NM_032052	5HSAR011306	BR376301	610	42	3	a	ggcgggcaggtgcagcggccgggctagt	a	ggg	28
ACCN1	NM_183377	5HSAR012238	BR378939	676	42	3	c	cgcccgcggaggcggcagcggcggcgcc	c	ggg	28
MST4	NM_016542	5HSAR014837	BR386720	175	42	3	c	cgccagaaaggccccgatcgaaaagcct	a	ggg	28
CISD3	NM_001136498	5HSAR015905	BR390055	42	42	3	c	gaggtgacccggcgggggcggagccagc	c	ggg	28
RDH8	NM_015725	5HSAR016592	BR391996	121	42	3	a	cagaggctttgccctgcaggggatctgt	a	ggg	28
ATF1	NM_005171	5HSAR017209	BR393933	184	42	3	t	gaagtgggtagtgaattcggatctacct	a	ggg	28
GLP-1	NM_001103167	5HSAR017815	BR395781	14	42	3	t	cccagcgggacagggccgggtgaaatta	a	ggg	28
TRAPPC4	NM_016146	5HSAR018727	BR398498	174	46	4	t	ccggcggcaagtgctgtgatgcggttcc	a	gggg	28
BCAN	NM_021948	5HSAR020251	BR402106	120	42	3	c	gggaagaaagggggttttgtgctgcgcc	a	ggg	28
BCAN	NM_198427	5HSAR020251	BR402112	120	42	3	c	gggaagaaagggggttttgtgctgcgcc	a	ggg	28
SHD	NM_020209	5HSAR020516	BR402615	102	42	3	c	agcggggcacagagcagagccctcttgg	a	ggg	28
RBM9	NM_014309	5HSAR022535	BR406492	108	42	3	t	gcttccttcagccatctgcctgagatat	a	ggg	28
RBM9	NM_001031695	5HSAR022535	BR406493	108	42	3	t	gcttccttcagccatctgcctgagatat	a	ggg	28
RBM9	NM_001082576	5HSAR022535	BR406495	108	42	3	t	gcttccttcagccatctgcctgagatat	a	ggg	28
RBM9	NM_001082577	5HSAR022535	BR406501	108	42	3	t	gcttccttcagccatctgcctgagatat	a	ggg	28
CDKN2D	NM_001800	5HSAR025782	BR414716	4	42	3	a	tgagttagggggagacccggcccccaag	c	ggg	28
SH3BP2	NM_001122681	5HSAR026787	BR417728	7	42	3	c	acggagctgcggcggcggcgggtcccgc	c	ggg	28
CTBP2	NM_001329	5HSAR028348	BR422140	139	42	3	a	gcgggagacgccgccgccgccgcctcca	t	ggg	28
GSK3B	NM_002093	5HSAR028670	BR423125	153	42	3	c	agggcggccgagctgttgccgcggacgg	a	ggg	28
GSK3B	NM_001146156	5HSAR028670	BR423336	153	42	3	c	agggcggccgagctgttgccgcggacgg	a	ggg	28
HAND2	NM_021973	5HSAR029331	BR425073	805	42	3	c	cccgggcgcccgggggctggggggtggg	t	ggg	28
WRN	NM_000553	5HSAR029940	BR426972	73	42	3	a	aaggggaggcggggagagcgacggcggg	c	ggg	28
EXOC3L	NM_178516	5HSAR000428	BR346408	20	43	3	a	aggagcctcggtgggaagaaggggcttct	t	ggg	29
KCTD9	NM_017634	5HSAR002563	BR350404	81	43	3	c	aggagaaaaaggtgggaggaggaccaggt	a	ggg	29
LOC647013	XM_001726034	5HSAR006544	BR361873	57	43	3	c	aggagaaaaaggtgggaagaggaccaggt	a	ggg	29
LOC100134333	XM_001713762	5HSAR007982	BR366549	20	43	3	a	aggagcctcggtgggaagaaggggcttct	t	ggg	29
LOC100130525	XM_001713763	5HSAR008016	BR366646	20	43	3	a	aggagcctcggtgggaagaaggggcttct	t	ggg	29
FJX1	NM_014344	5HSAR012218	BR378883	124	51	5	c	agcggggggcggggagcggaggcggagga	a	ggggg	29
TMTC4	NM_032813	5HSAR014126	BR384476	34	43	3	c	tgcctggagccgccagagtttccgcaccc	a	ggg	29
SERP1	NM_014445	5HSAR014144	BR384534	43	43	3	a	tgcgcctgctttcgccctccttctccagc	a	ggg	29
ME2	NM_002396	5HSAR015650	BR389270	146	43	3	a	ccgggcggcgcgggagctgagcatcgcca	c	ggg	29
DGCR6	NM_005675	5HSAR016454	BR391555	37	43	3	c	gcgcgctgcgctagggactgtcataaaag	c	ggg	29
GSX2	NM_133267	5HSAR017216	BR393957	43	43	3	t	gggctataaaatacccgagccggggcgcc	c	ggg	29
NAB1	NM_005966	5HSAR020429	BR402450	31	43	3	c	tgggcgggaagaagcggcgggcccgaggt	g	ggg	29
RAB33B	NM_031296	5HSAR022345	BR406167	193	43	3	c	cgggtgccacacctgtgcgggcaagggcg	c	ggg	29
FUT1	NM_000148	5HSAR023766	BR409450	717	43	3	c	gctccaccttccagccatccgcccggccc	a	ggg	29
RAD51L3	NM_002878	5HSAR025646	BR414298	37	43	3	c	ctctgggcgcgggaatcccggcggatccc	c	ggg	29
RAD51L3	NM_001142571	5HSAR025646	BR414805	37	43	3	c	ctctgggcgcgggaatcccggcggatccc	c	ggg	29
LOXL4	NM_032211	5HSAR028596	BR422902	15	43	3	c	aggcggataaaaaggccccagggcgcccg	a	ggg	29
MAF	NM_005360	5HSAR029537	BR425750	611	43	3	a	agggcgggcgcggggggcgcgggcagggc	g	ggg	29
MAF	NM_001031804	5HSAR029537	BR425762	611	43	3	a	agggcgggcgcggggggcgcgggcagggc	g	ggg	29
EPHB6	NM_004445	5HSAR030181	BR427699	2	43	3	c	ccgggccggcttgggaggggacgcggagg	c	ggg	29
PRRX2	NM_016307	5HSAR001968	BR349645	50	44	3	a	cggaaagtttgtttccccgacgtcagcgcc	c	ggg	30
C20orf39	NM_024893	5HSAR002295	BR349972	386	44	3	c	gagaggcgtggggagcagagcggcgctgag	a	ggg	30
LOC728789	XM_001132880	5HSAR004076	BR353909	525	44	3	c	agccgctgctgaaaggaggcctgggttgtt	a	ggg	30
LOC728905	XM_001133071	5HSAR004081	BR353923	525	44	3	c	agccgctgctgaaaggaggcctgggttgtt	a	ggg	30
LOC100134600	XM_001725459	5HSAR005813	BR359388	3234	44	3	a	ggagaaggtgtatcgctttcggagggtgac	a	ggg	30
LOC100133169	XM_001725752	5HSAR005913	BR359716	3234	44	3	a	ggagaaggtgtatcgctttcggagggtgac	a	ggg	30
LOC100133169	XM_001723134	5HSAR005990	BR359962	3234	44	3	a	ggagaaggtgtatcgctttcggagggtgac	a	ggg	30
LOC100133169	XM_001719014	5HSAR006067	BR360220	3234	44	3	a	ggagaaggtgtatcgctttcggagggtgac	a	ggg	30
SLC27A4	NM_005094	5HSAR013131	BR381379	76	44	3	c	gtaggagcgcggcgggcggggccgggcggc	c	ggg	30
TNK2	NM_005781	5HSAR015725	BR389510	109	44	3	a	cccggccggtggggccccgggggcctgcgg	a	ggg	30
C1orf122	NM_198446	5HSAR016861	BR392832	515	48	4	c	cgcagccttgcgaagccctaacgcagcgct	a	gggg	30
PHF16	NM_014735	5HSAR020364	BR402326	130	44	3	c	ggcgaggaggggattaaggggcaggtgcga	a	ggg	30
APC	NM_001127511	5HSAR030750	BR429381	29	44	3	c	gtgtggccgccggaagcctagccgctgctc	g	ggg	30
SLC7A8	NM_182728	5HSAR010735	BR374689	39	45	3	a	acatgcctcaccccttttgctccagctggag	a	ggg	31
OAZ2	NM_002537	5HSAR010808	BR374892	2	45	3	c	gcggcggcggcggcggcggcggtggcggccg	a	ggg	31
NRSN2	NM_024958	5HSAR014020	BR384138	5	45	3	c	ggcccggcgaggagaagcggtttctacgctg	t	ggg	31
TESK1	NM_006285	5HSAR017927	BR396107	179	45	3	c	tccaggatcttcggcggatcttccattctca	c	ggg	31
PRKACA	NM_002730	5HSAR021483	BR404502	21	45	3	c	cgggcgcggagagacgcgggaagcaggggct	c	ggg	31
FUT7	NM_004479	5HSAR023791	BR409475	632	49	4	t	acagtggttgatgccaaaggttgtgggggca	c	gggg	31
ADSS	NM_001126	5HSAR023928	BR409760	133	49	4	c	actggctggagggtggcggcccggcggggcg	c	gggg	31
WDTC1	NM_015023	5HSAR026362	BR416448	244	45	3	c	cggaggcgctgtccggccccggccaggcgcc	c	ggg	31
TOM1L2	NM_001033551	5HSAR003347	BR351867	15	50	4	c	ccaaaggccctaagctcggcgttccagagagt	a	gggg	32
TOM1L2	NM_001082968	5HSAR003347	BR373910	15	50	4	c	ccaaaggccctaagctcggcgttccagagagt	a	gggg	32
PATZ1	NM_014323	5HSAR011306	BR376279	402	46	3	c	cggagaggagagagtggcgcgcagtccagcga	c	ggg	32
PATZ1	NM_032050	5HSAR011306	BR376284	402	46	3	c	cggagaggagagagtggcgcgcagtccagcga	c	ggg	32
PATZ1	NM_032051	5HSAR011306	BR376290	402	46	3	c	cggagaggagagagtggcgcgcagtccagcga	c	ggg	32
PATZ1	NM_032052	5HSAR011306	BR376301	402	46	3	c	cggagaggagagagtggcgcgcagtccagcga	c	ggg	32
STBD1	NM_003943	5HSAR012214	BR378873	38	46	3	a	agcccggggctgcagcccaggggcggggagcg	c	ggg	32
2002-09-01	NM_004404	5HSAR016951	BR393129	27	46	3	c	ctggggcgggctgtgagcggaccgcgagcgct	c	ggg	32
2002-09-01	NM_001008492	5HSAR016965	BR393178	27	46	3	c	ctggggcgggctgtgagcggaccgcgagcgct	c	ggg	32
EIF6	NM_181468	5HSAR021351	BR404245	82	46	3	c	acccgaggacggaggggccgggaggccgagag	c	ggg	32
CCDC85C	NM_001144995	5HSAR021856	BR405224	121	46	3	t	cggggcggcgggggctccgggagctgggccgg	c	ggg	32
POU2F2	NM_002698	5HSAR023526	BR408984	18	46	3	t	gagatgacacagttgttcccccagccctggcg	c	ggg	32
SLC15A3	NM_016582	5HSAR026639	BR417276	95	46	3	t	ccaaagcggtgagaaaggagggccagccagtt	t	ggg	32
F11R	NM_016946	5HSAR027094	BR418654	123	46	3	t	gagctggccaatcaggcgcggagggcggggcc	c	ggg	32
PKM2	NM_182470	5HSAR029758	BR426416	46	46	3	c	gcccgggtcgcccggagccgggattgggcaga	c	ggg	32
C6orf120	NM_001029863	5HSAR000107	BR345772	108	47	3	a	gttaacccacccctcctccccggggcctcacgc	t	ggg	33
LOC100129467	XM_001722346	5HSAR006882	BR363005	231	47	3	t	actcatggggacctcgctgctaactcttgttgt	g	ggg	33
LOC100129467	XM_001722248	5HSAR007020	BR363441	231	47	3	t	actcatggggacctcgctgctaactcttgttgt	g	ggg	33
ANAPC4	NM_013367	5HSAR010881	BR375091	26	47	3	c	gcggcctggaggctgtggcgcgcggccggcaga	a	ggg	33
CBX1	NM_006807	5HSAR014419	BR385399	137	47	3	c	gcgcgaatcctgagccagagactgagtgcttgg	t	ggg	33
RBCK1	NM_031229	5HSAR017603	BR395161	44	47	3	c	agtccggggacccgcgatcagccccggaggacg	t	ggg	33
RBCK1	NM_006462	5HSAR017610	BR395180	44	47	3	c	agtccggggacccgcgatcagccccggaggacg	t	ggg	33
ITSN1	NM_003024	5HSAR017903	BR396035	7	47	3	a	agcgaaggaggtagagaagagtggaggcgccag	a	ggg	33
ITSN1	NM_001001132	5HSAR017903	BR396048	7	47	3	a	agcgaaggaggtagagaagagtggaggcgccag	a	ggg	33
ANKRD30B	NM_001145029	5HSAR020524	BR402631	38	47	3	c	tgcgggaactgaagacgggcgagtgcgagccgg	c	ggg	33
CACYBP	NM_014412	5HSAR021138	BR403830	132	47	3	c	gaggggtggggctaggctcggcgaggcgaggaa	t	ggg	33
APOBEC3F	NM_145298	5HSAR023145	BR408009	163	47	3	a	gccatgactacgaggccctgggaggtcacttta	a	ggg	33
APOBEC3F	NM_001006666	5HSAR023145	BR408340	163	47	3	a	gccatgactacgaggccctgggaggtcacttta	a	ggg	33
PLEKHG4	NM_015432	5HSAR024473	BR411132	2140	47	3	g	cgcgcggtaggccctgcaacaaggccagggcct	g	ggg	33
PLEKHG4	NM_001129731	5HSAR024560	BR411353	61	47	3	g	cgcgcggtaggccctgcaacaaggccagggcct	g	ggg	33
SLC18A3	NM_003055	5HSAR026329	BR416353	25	47	3	a	gagcgcagcggcggggctaacgggcgggcaagc	c	ggg	33
ALDH7A1	NM_001182	5HSAR028881	BR423745	91	47	3	a	gtcgggtctgcccaatgggttctcccgggcggg	c	ggg	33
APOBEC3G	NM_021822	5HSAR029445	BR425471	212	47	3	a	gccatgactacgaggccctgggaggtcacttta	a	ggg	33
DENND1A	NM_020946	5HSAR000413	BR346377	136	48	3	c	gagagcgccagagggaggccggtcggccgcgggc	c	ggg	34
DENND1A	NM_024820	5HSAR000413	BR346576	136	48	3	c	gagagcgccagagggaggccggtcggccgcgggc	c	ggg	34
C7orf51	NM_173564	5HSAR000655	BR346817	50	48	3	g	ccggcgcccggcaggccagtggatccgggaccca	a	ggg	34
CAPN7	NM_014296	5HSAR001625	BR349076	12	48	3	c	gcgagggccgctggggccgcgaagtggggcggcc	t	ggg	34
LOC730351	XM_001131419	5HSAR005740	BR359191	782	48	3	t	gccgaagcaatctgaaatgagccacgttgggggt	t	ggg	34
LOC730351	XM_001721303	5HSAR005862	BR359558	782	48	3	t	gccgaagcaatctgaaatgagccacgttgggggt	t	ggg	34
LOC730351	XM_001718985	5HSAR005951	BR359828	782	48	3	t	gccgaagcaatctgaaatgagccacgttgggggt	t	ggg	34
LOC730351	XM_001721476	5HSAR006117	BR360393	782	48	3	t	gccgaagcaatctgaaatgagccacgttgggggt	t	ggg	34
FTSJ3	NM_017647	5HSAR013171	BR381460	289	48	3	c	gtgtgcggcgagaccacactaagggaaccatgat	a	ggg	34
GTPBP1	NM_004286	5HSAR016025	BR390429	74	48	3	c	gctctgtgcatagattagtcaaatgagcctggga	a	ggg	34
TRIM13	NM_213590	5HSAR019659	BR400964	193	48	3	t	gagttgcccaggtcagcagggatctgcgtgggtt	g	ggg	34
GNG4	NM_001098722	5HSAR021216	BR403978	162	48	3	c	gccggtgacgggacgcggagaccccgcgggcggc	a	ggg	34
U2AF2	NM_007279	5HSAR027051	BR418535	861	48	3	c	cgggcgggtgagggggcggagcccgggcggggcg	a	ggg	34
U2AF2	NM_001012478	5HSAR027051	BR418545	861	48	3	c	cgggcgggtgagggggcggagcccgggcggggcg	a	ggg	34
AHCYL1	NM_006621	5HSAR030208	BR427775	261	48	3	t	cgatcgcgtgtcggagggcgccgcgcgggcaggc	c	ggg	34
DHFR	NM_000791	5HSAR030830	BR429615	365	52	4	c	gggcggggcctcgcctgcacaaatggggacgagg	c	gggg	34
LOC100130930	XM_001726287	5HSAR008517	BR368007	3033	49	3	t	accctgcctcctccacatgttccccaaggaagcca	t	ggg	35
LOC100130930	XM_001726431	5HSAR008556	BR368127	3033	49	3	t	accctgcctcctccacatgttccccaaggaagcca	t	ggg	35
LOC100130930	XM_001723136	5HSAR008623	BR368336	3033	49	3	t	accctgcctcctccacatgttccccaaggaagcca	t	ggg	35
TLE3	NM_005078	5HSAR009437	BR370987	948	49	3	c	cgcccgactctgggatttcgctgcgagaacgagct	g	ggg	35
TLE3	NM_020908	5HSAR009437	BR370990	948	49	3	c	cgcccgactctgggatttcgctgcgagaacgagct	g	ggg	35
TLE3	NM_001105192	5HSAR009437	BR370996	948	49	3	c	cgcccgactctgggatttcgctgcgagaacgagct	g	ggg	35
TFEB	NM_007162	5HSAR012788	BR380674	5	49	3	c	catgggccttcccggcccggagctgggagtcgaag	c	ggg	35
TMEM26	NM_178505	5HSAR013114	BR381344	13	49	3	c	gataccggacagggatggagactggccccgagatt	a	ggg	35
CBLN1	NM_004352	5HSAR013300	BR381839	278	49	3	g	gcggctggcgcgagcagccctgggggtggggggcg	t	ggg	35
MOV10	NM_020963	5HSAR016378	BR391308	224	49	3	a	gtcagacgctttaggaaagagttaatgcgaagagg	a	ggg	35
RAB43	NM_198490	5HSAR017672	BR395361	71	49	3	c	gccgagccgggccggggcgggagccagccggggtg	c	ggg	35
ARID1A	NM_139135	5HSAR019982	BR401590	275	49	3	a	cagcccgggggactgggccccggggcggggtggga	g	ggg	35
ARID1A	NM_006015	5HSAR019982	BR401598	275	49	3	a	cagcccgggggactgggccccggggcggggtggga	g	ggg	35
PHPT1	NM_014172	5HSAR023495	BR408900	188	49	3	a	ggagagagggaggcctttgggcggtgggggccacg	a	ggg	35
PHPT1	NM_001135861	5HSAR023495	BR408956	188	49	3	a	ggagagagggaggcctttgggcggtgggggccacg	a	ggg	35
FKBP6	NM_003602	5HSAR023678	BR409362	74	49	3	a	cagcggggcgcaccaggccgaaggctcacgccaca	a	ggg	35
SLC12A4	NM_005072	5HSAR024013	BR409969	7	49	3	c	cggaggaagtgagcgcagcggggaggaatgcgagc	c	ggg	35
PPP1CA	NM_002708	5HSAR028134	BR421508	28	49	3	c	cggaaggagagccaggccggaaggaggctgccgga	c	ggg	35
PPP1CA	NM_001008709	5HSAR028134	BR423183	28	49	3	c	cggaaggagagccaggccggaaggaggctgccgga	c	ggg	35
TJP2	NM_004817	5HSAR030087	BR427412	17	49	3	c	ctgacgccgccgccgccgcgggaggagggacaaag	t	ggg	35
MAPK3	NM_002746	5HSAR030886	BR429785	41	49	3	c	gcctcgggcggggccgccgtggggaggagggcggt	a	ggg	35
MAPK3	NM_001040056	5HSAR030886	BR429798	41	49	3	c	gcctcgggcggggccgccgtggggaggagggcggt	a	ggg	35
KAT2B	NM_003884	5HSAR031198	BR430758	304	49	3	c	gaggggggtgggcgaagggggcgggagggcgtggg	a	ggg	35
CREBL2	NM_001310	5HSAR001199	BR347932	196	50	3	c	ggccgggccaggccggctgagccgggggagggctcc	a	ggg	36
LARP1	NM_033551	5HSAR011075	BR375632	95	54	4	c	gggagggagggacgggactagaagcctgccgggctc	t	gggg	36
UBP1	NM_001128160	5HSAR011234	BR376075	76	50	3	c	ccgggggcaaggagtcaaggcttgggggcgggtgac	c	ggg	36
LYNX1	NM_177477	5HSAR016123	BR390736	19	50	3	c	gcctgcggtgagctcgcgctgggcgggctgttccgg	c	ggg	36
CELSR3	NM_001407	5HSAR017732	BR395539	201	50	3	a	ggcccgagcggcggggccagcccaaggcccggaccg	c	ggg	36
CTDSP2	NM_005730	5HSAR018765	BR398603	151	50	3	t	cgctgcagccgcgggttgtttatctggagtacggag	a	ggg	36
ZBTB22	NM_005453	5HSAR021821	BR405159	15	50	3	a	gcccaggttgctgctctggccgccgagtgaggggcg	g	ggg	36
PCNX	NM_014982	5HSAR027033	BR418479	396	50	3	c	gacggcggcggcggcggcggcgacggcggcggcgcc	t	ggg	36
NRAS	NM_002524	5HSAR029556	BR425805	77	50	3	c	gactcaggcgcctggggcgccgactgattacgtagc	c	ggg	36
SFI1	NM_014775	5HSAR029996	BR427133	174	50	3	c	gtggtcctcgtgcgcgccgcgtcgccgtggagacga	c	ggg	36
RNASE4	NM_002937	5HSAR002281	BR349958	230	51	3	c	tgctgctgcggcgccagctccaagggcggatccaggc	a	ggg	37
CTGLF6	XM_001716810	5HSAR006655	BR362242	1292	51	3	t	gcactgtgaggtgtcggggagggcattgtgaagtgtg	t	ggg	37
CTGLF7	XM_001714786	5HSAR006659	BR362254	1292	51	3	t	gcactgtgaggtgtcggggagggcattgtgaagtgtg	t	ggg	37
LOC100133472	XM_001714530	5HSAR006750	BR362566	850	51	3	t	gcactgtgaggtgtcggggagggcattgtgaagtgtg	t	ggg	37
LOC650155	XM_939236	5HSAR006765	BR362623	1642	51	3	t	gcactgtgaggtgtcggggagggcattgtgaagtgtg	t	ggg	37
LOC727804	XM_001125843	5HSAR008080	BR366841	1202	51	3	a	cagaggaggtggggaaggagtctgcagcaactgggct	t	ggg	37
GDF7	NM_182828	5HSAR011906	BR378009	135	51	3	a	ggcgggtgtttctctgcgggggagtggggaggaagct	c	ggg	37
KLRAQ1	NM_001135629	5HSAR014331	BR385122	128	51	3	c	agacaggctgagccgcctgggcggcctggcctgtacg	c	ggg	37
DENND2C	NM_198459	5HSAR015942	BR390176	10	51	3	t	gctgcagccgggacggggccttcggcagggcctgcgg	c	ggg	37
SLC30A4	NM_013309	5HSAR019319	BR400273	159	51	3	c	gagatgagttgcggccccgcggcagcgccccaggatg	a	ggg	37
CBFB	NM_001755	5HSAR021020	BR403600	125	51	3	c	cgcctgaaacaaagggaagcgggcgtccgggcgccgc	t	ggg	37
CBFB	NM_022845	5HSAR021020	BR403619	125	51	3	c	cgcctgaaacaaagggaagcgggcgtccgggcgccgc	t	ggg	37
NGB	NM_021257	5HSAR021438	BR404415	56	55	4	c	gccgtggcggctttaaagcgcccagcccaggcgtcgc	t	gggg	37
KCNAB1	NM_172159	5HSAR021463	BR404462	281	51	3	a	gtcttgaggagcccccacgtcctcccggagcggaggc	a	ggg	37
GPC1	NM_002081	5HSAR024861	BR412128	145	51	3	c	aactgcgcaggacccggccaggatccgagagaggcgc	c	ggg	37
XPO1	NM_003400	5HSAR025618	BR414216	450	51	3	c	agcatttattccccagattaattccccttttgggggg	c	ggg	37
ANG	NM_001145	5HSAR027608	BR419912	266	51	3	c	tgctgctgcggcgccagctccaagggcggatccaggc	a	ggg	37
CTBP2	NM_001329	5HSAR028348	BR422140	130	51	3	t	gtgggaggggcgggagacgccgccgccgccgcctcca	t	ggg	37
RASAL2	NM_170692	5HSAR029051	BR424241	436	51	3	a	cgagcctcccctcccgggttcttctgcgtcctctccc	a	ggg	37
SLC29A1	NM_001078177	5HSAR031328	BR431149	95	51	3	a	cgggcctgacggctccgcagcccggagaagggacgcc	t	ggg	37
CLDND1	NM_001040199	5HSAR003536	BR352394	318	52	3	c	ttccgagcggcggatttgtcccagggccgagccctcta	c	ggg	38
EFEMP2	NM_016938	5HSAR011444	BR376661	14	52	3	c	cggaggcgccggggtgggccgcgccgcggcaggcgggc	c	ggg	38
AGXT2L2	NM_153373	5HSAR012725	BR380535	116	56	4	c	ccgagtgcgaacctgagccccaaatcccgacccaggca	c	gggg	38
LYL1	NM_005583	5HSAR012786	BR380670	84	52	3	c	gagaaggcgggccggcccgggagccgctcactttccct	g	ggg	38
RPP25	NM_017793	5HSAR015653	BR389281	573	52	3	c	cccggccgggccgggtcaggggaggggcctggcggcag	c	ggg	38
HOXC8	NM_022658	5HSAR017730	BR395533	100	56	4	a	agtttcgggggtactgggcggggtactcgtgagccaga	a	gggg	38
DENND4A	NM_005848	5HSAR018622	BR398185	79	52	3	a	ggagtcccgtctgactgagacggcaggcctgggcgggc	c	ggg	38
OSBPL10	NM_017784	5HSAR019682	BR401009	41	52	3	t	tgaggctgcccctccctccaggtcccgaggtggataag	t	ggg	38
ELOVL2	NM_017770	5HSAR021230	BR404005	5	52	3	c	gaggcgcgggcgggtgtgcgcgcgccgggcgtgggtgt	t	ggg	38
PLEKHG4	NM_015432	5HSAR024473	BR411132	1805	52	3	c	gctggcgggctgtccgggcccacggagaggacggcggc	c	ggg	38
KIF14	NM_014875	5HSAR026943	BR418202	99	52	3	a	cgtgcggacgctttccctacaggcgaccactgctctgc	c	ggg	38
PEX5	NM_001131025	5HSAR028491	BR422577	196	52	3	a	accgggccgagccgggggaagggctccggtgacttaag	a	ggg	38
MFSD5	NM_032889	5HSAR000831	BR347129	63	53	3	c	agcgctgctggaacccgagccggagccggagccacagcg	a	ggg	39
APOL3	NM_014349	5HSAR002194	BR349871	8	53	3	t	accaagggtgctgctggaccaaggatgggactgggccaa	t	ggg	39
KCTD9	NM_017634	5HSAR002563	BR350404	71	53	3	a	gaagggcgggaggagaaaaaggtgggaggaggaccaggt	a	ggg	39
APOL3	NM_030644	5HSAR002884	BR350960	8	53	3	t	accaagggtgctgctggaccaaggatgggactgggccaa	t	ggg	39
APOL3	NM_145639	5HSAR003028	BR351213	8	53	3	t	accaagggtgctgctggaccaaggatgggactgggccaa	t	ggg	39
LOC647013	XM_001726034	5HSAR006544	BR361873	47	53	3	a	gaagggcgggaggagaaaaaggtgggaagaggaccaggt	a	ggg	39
CNTROB	NM_001037144	5HSAR011572	BR377077	11	53	3	c	tgacgtcatcgaggcgagagaggcggagccgtggacagt	c	ggg	39
ACOT7	NM_181864	5HSAR014899	BR386909	3	53	3	a	gcggtcctaggaggagcaggagcctggtgctttctatca	a	ggg	39
ACSS1	NM_032501	5HSAR015376	BR388427	747	53	3	a	ggccctggaggaatggatggtggcggaagggcggagcag	c	ggg	39
RASA1	NM_002890	5HSAR027390	BR419259	35	53	3	t	gctgctcggagcccgggcctggtggcccctggggctccc	c	ggg	39
EPHB4	NM_004444	5HSAR029873	BR426769	149	53	3	a	ggggagaccgcgagcggccggctcagcccccgccacccg	c	ggg	39
TLN1	NM_006289	5HSAR030375	BR428296	190	53	3	t	ggacgttcccaggacggaagtggccgagagagtgtcgaa	a	ggg	39
NHLRC3	NM_001012754	5HSAR000963	BR347468	38	54	3	c	aaagggtggtcactgggtcagcccgaagcacctgacatga	c	ggg	40
MAGED2	NM_201222	5HSAR009382	BR370832	9	54	3	c	gtcctcagagctgccgcgctggcacatcttcctggagaag	a	ggg	40
GPSM2	NM_013296	5HSAR009761	BR371934	115	54	3	c	agcagggggcgcgccggcctcctgcggtgcccctgccttg	a	ggg	40
DARS	NM_001349	5HSAR017682	BR395389	102	54	3	a	agggagaagcccctttggcctgccttacggaagcctgcga	a	ggg	40
HS3ST4	NM_006040	5HSAR018022	BR396397	132	54	3	g	gcggtggtgggggggccacccggactcggcgggcagcgtg	c	ggg	40
ANKRD40	NM_052855	5HSAR018247	BR397080	84	54	3	a	agcggaagtcccggggcgggcgcgggcagcggcgcgagca	c	ggg	40
DUSP22	NM_020185	5HSAR020753	BR403085	101	54	3	c	cggagcgaggagggacgctgggcctgcccggtgcgcacgg	c	ggg	40
AKAP12	NM_144497	5HSAR021656	BR404843	52	54	3	a	gccagcgccagcccgcgtgtgggtggctgggtgggggcgt	t	ggg	40
ProSAPiP1	NM_014731	5HSAR023621	BR409234	391	54	3	a	caggcctgccacctactgcagccgcggcccccgtccatcc	a	ggg	40
SDC2	NM_002998	5HSAR024547	BR411324	37	54	3	a	agccagaggaaaagaagaggaggagaaggaggaggacccg	a	ggg	40
GADD45A	NM_001924	5HSAR025033	BR412563	98	54	3	a	gtggccggagctgcggcggctggcacaggaggaggagccc	c	ggg	40
PTEN	NM_000314	5HSAR030124	BR427523	520	54	3	g	agaagcggcggcggcggcggccgcggcggctgcagctcca	a	ggg	40
RBPMS	NM_001008711	5HSAR001523	BR348850	16	55	3	a	cggagggaggaggagaggcgcggagaggagggaggggagag	a	ggg	41
RBPMS	NM_006867	5HSAR001523	BR350188	16	55	3	a	cggagggaggaggagaggcgcggagaggagggaggggagag	a	ggg	41
RBPMS	NM_001008712	5HSAR001523	BR351073	16	55	3	a	cggagggaggaggagaggcgcggagaggagggaggggagag	a	ggg	41
RBPMS	NM_001008710	5HSAR001523	BR352157	16	55	3	a	cggagggaggaggagaggcgcggagaggagggaggggagag	a	ggg	41
RSPO1	NM_001038633	5HSAR010691	BR374567	140	55	3	c	cggagcgcaggcgagccgggcgcccaggacagtcccgcagc	c	ggg	41
UBAP2L	NM_014847	5HSAR011048	BR375559	5	55	3	c	ggaaggcgcgagagcgagcgcgagagggaaaaggagggagg	t	ggg	41
DNAJC28	NM_017833	5HSAR011634	BR377250	28	55	3	c	agccgcggaacccctaccccaggtctgcgcaggtgaggagg	c	ggg	41
DNAJC4	NM_005528	5HSAR011935	BR378088	136	55	3	c	gcctggttgtggcccctccttctcccgtccccaagttccct	t	ggg	41
KATNB1	NM_005886	5HSAR013606	BR382801	295	55	3	g	gatccacccccaccccacgaggaaagcacagtttattttgt	t	ggg	41
C8orf42	NM_175075	5HSAR014624	BR386033	367	55	3	c	ccgggtcctggggagggtttggggcgggcctggtggggagg	c	ggg	41
NRD1	NM_002525	5HSAR016663	BR392215	152	55	3	a	cggagggacgagggaagtcggcgagagggagactgggttgg	a	ggg	41
SLC37A2	NM_198277	5HSAR021772	BR405066	89	55	3	c	cgcaagggggcgggcgctgccgtactcaggccgcggggcca	c	ggg	41
SLC37A2	NM_001145290	5HSAR021772	BR405070	89	55	3	c	cgcaagggggcgggcgctgccgtactcaggccgcggggcca	c	ggg	41
TRIM45	NM_025188	5HSAR022664	BR406750	183	55	3	t	gtcggcgcttgtcgcgtgtggcgcgcagtggggcgggcggc	a	ggg	41
TRIM45	NM_001145635	5HSAR022664	BR406754	183	55	3	t	gtcggcgcttgtcgcgtgtggcgcgcagtggggcgggcggc	a	ggg	41
SPTY2D1	NM_194285	5HSAR000298	BR346134	54	56	3	c	cagacggcataggaaggcgccggaagtggtcccgcagaggcg	t	ggg	42
C16orf72	NM_014117	5HSAR000386	BR346324	145	56	3	t	aaggcctggggcgggggtcgtccctggttgcacggggccgcg	c	ggg	42
LOC100127984	XM_001726904	5HSAR005507	BR358457	2371	56	3	t	gcctgtgtctccctccagcctccagctggactgagaaggttt	t	ggg	42
LOC100127984	XM_001719757	5HSAR005615	BR358847	2372	56	3	t	gcctgtgtctccctccagcctccagctggactgagaaggttt	t	ggg	42
LOC100127984	XM_001719916	5HSAR005695	BR359083	2371	56	3	t	gcctgtgtctccctccagcctccagctggactgagaaggttt	t	ggg	42
C6orf195	NM_152554	5HSAR010378	BR373725	684	56	3	a	aagttgcctctgaggaacggcctacagtggcttacaactccc	a	ggg	42
ARHGAP11A	NM_199357	5HSAR012993	BR381096	137	56	3	a	aacgagcagcctgtgagacggggtgacggcggctaccagccc	c	ggg	42
ARHGAP11A	NM_014783	5HSAR012993	BR381157	137	56	3	a	aacgagcagcctgtgagacggggtgacggcggctaccagccc	c	ggg	42
ADNP2	NM_014913	5HSAR014289	BR384985	289	56	3	t	cgcgcgctgaggcgggggtcccgccgcgcggggcggaggcgc	c	ggg	42
2002-09-01	NM_004404	5HSAR016951	BR393129	17	56	3	c	gcggggcgggctggggcgggctgtgagcggaccgcgagcgct	c	ggg	42
2002-09-01	NM_001008492	5HSAR016965	BR393178	17	56	3	c	gcggggcgggctggggcgggctgtgagcggaccgcgagcgct	c	ggg	42
MIA	NM_006533	5HSAR016986	BR393244	38	56	3	c	gacaagaccaagaacacaagtttccttgtactacgggagaga	a	ggg	42
ADK	NM_006721	5HSAR017401	BR394538	8	56	3	c	accagagagtggatggcagaggtgggctgtagagccaaagtg	t	ggg	42
FAM36A	NM_198076	5HSAR000691	BR346882	301	57	3	a	gcgcggccagccgggcttctgcttccgcgaccccggcggtgca	c	ggg	43
BCL9L	NM_182557	5HSAR003516	BR352342	459	61	4	c	cgtggccccaaccccgggccccctccacggctggagcgctctg	t	gggg	43
LNP1	NM_001085451	5HSAR010348	BR373641	248	57	3	c	agtggcagaagagttgtgaaggctattggctagcaagggtggt	c	ggg	43
DACT3	NM_145056	5HSAR012932	BR380970	4	61	4	c	aggtgggaccgggagaggggtggccgcggggcccggccgggct	c	gggg	43
HMHA1	NM_012292	5HSAR017064	BR393493	76	57	3	a	cccgccagtgacggccgggcctgtcacgtgggcctgacagctg	a	ggg	43
CBR3	NM_001236	5HSAR017506	BR394866	12	57	3	c	cccgggagttggaacagagggcacagacggcccctcctcggag	a	ggg	43
BCAN	NM_021948	5HSAR020251	BR402106	105	57	3	a	cggggcaggggcggggggaagaaagggggttttgtgctgcgcc	a	ggg	43
BCAN	NM_198427	5HSAR020251	BR402112	105	57	3	a	cggggcaggggcggggggaagaaagggggttttgtgctgcgcc	a	ggg	43
CLDN5	NM_001130861	5HSAR022348	BR406173	444	57	3	c	ctttctggagagcccccctacgagggcctctacggcggtgacg	t	ggg	43
LOC648245	XM_001720502	5HSAR006407	BR361424	802	58	3	t	cgtcctctagctcctcccggtgccctgggtgctgggtgctggat	t	ggg	44
LOC648245	XM_001723031	5HSAR006460	BR361594	802	58	3	t	cgtcctctagctcctcccggtgccctgggtgctgggtgctggat	t	ggg	44
LOC100129395	XM_001725489	5HSAR008118	BR366879	1291	58	3	t	aacacccaactccacatgctcacccactcacacctcctcactga	t	ggg	44
LOC100129395	XM_001722623	5HSAR008292	BR367337	1291	58	3	t	aacacccaactccacatgctcacccactcacacctcctcactga	t	ggg	44
LOC100129395	XM_001720520	5HSAR008341	BR367473	1291	58	3	t	aacacccaactccacatgctcacccactcacacctcctcactga	t	ggg	44
LOC648245	XM_001715437	5HSAR009185	BR370258	802	58	3	t	cgtcctctagctcctcccggtgccctgggtgctgggtgctggat	t	ggg	44
SEMA3B	NM_004636	5HSAR017496	BR394834	1	58	3	c	ggctgcttcttaaaggagccgtcagagggtccccagcggcccca	t	ggg	44
TREX1	NM_033629	5HSAR019143	BR399758	301	58	3	g	aacggatggtggtgagagggacagaccaggcaggctgacgagca	c	ggg	44
ARID1A	NM_139135	5HSAR019982	BR401590	266	58	3	c	tggggagggcagcccgggggactgggccccggggcggggtggga	g	ggg	44
ARID1A	NM_006015	5HSAR019982	BR401598	266	58	3	c	tggggagggcagcccgggggactgggccccggggcggggtggga	g	ggg	44
TREX1	NM_016381	5HSAR022135	BR405754	301	58	3	g	aacggatggtggtgagagggacagaccaggcaggctgacgagca	c	ggg	44
BRD2	NM_005104	5HSAR026267	BR416161	264	58	3	a	gctgggggctacgccccctcccccagcacggcttcgttttctgg	g	ggg	44
U2AF2	NM_007279	5HSAR027051	BR418535	843	62	4	a	caagctcgcgggcgggcgggcgggtgagggggcggagcccgggc	c	gggg	44
U2AF2	NM_001012478	5HSAR027051	BR418545	843	62	4	a	caagctcgcgggcgggcgggcgggtgagggggcggagcccgggc	c	gggg	44
ZFP91	NM_053023	5HSAR012811	BR380723	88	67	5	c	gagcagcgccgaggccgccgcctccgcctccgccgcctaggacta	t	ggggg	45
B3GNT9	NM_033309	5HSAR012828	BR380757	247	59	3	a	cggggctcgctgccccctgctgccgactgcgacccttacagggga	a	ggg	45
PICALM	NM_007166	5HSAR013622	BR382851	208	59	3	t	gaccctccggctcttgggggtcccagtccccgccggctgctgagc	t	ggg	45
RPP25	NM_017793	5HSAR015653	BR389281	270	59	3	c	ggaggaggggcaaggccccagcaagcctcttggaaatctctccct	a	ggg	45
PIP4K2B	NM_003559	5HSAR015676	BR389356	333	63	4	c	tgggaggtaacgggacgggcgcgaccatggcgcggtgagggagcg	t	gggg	45
FOXA2	NM_021784	5HSAR021309	BR404157	81	59	3	a	aggaggggacggtgctttggctgacttttttttaaaagagggtgg	t	ggg	45
BRSK1	NM_032430	5HSAR022532	BR406489	123	59	3	g	gccagcccagccccctggggacccccggagaggtggggggcagcc	g	ggg	45
KCNMB1	NM_004137	5HSAR027250	BR419029	261	59	3	c	gaggccaaacttcctgctgaagctctgtggcctcttttggggtgg	c	ggg	45
KAT2B	NM_003884	5HSAR031198	BR430758	294	59	3	a	cgggggcggggaggggggtgggcgaagggggcgggagggcgtggg	a	ggg	45
FAM150B	NM_001002919	5HSAR000949	BR347430	167	60	3	c	cgggttccgggggctcctttccgcaccagcggcggtcgctccccgt	c	ggg	46
STX16	NM_003763	5HSAR013200	BR381521	642	60	3	t	ccagccgggccacgagaaagaaagtgaataaatcaggaatataagt	c	ggg	46
STX16	NM_001134772	5HSAR013200	BR381524	642	60	3	t	ccagccgggccacgagaaagaaagtgaataaatcaggaatataagt	c	ggg	46
STX16	NM_001134773	5HSAR013200	BR381531	642	60	3	t	ccagccgggccacgagaaagaaagtgaataaatcaggaatataagt	c	ggg	46
FOSL2	NM_005253	5HSAR013408	BR382181	494	60	3	c	agggcgcgcgcaggggagggaccgagagacgcgccgactttttaga	a	ggg	46
PPP2CB	NM_001009552	5HSAR014935	BR387017	187	60	3	c	cgggggtctcctccaggctgcgcgctcggagccgcctgctgggctt	c	ggg	46
HEXIM1	NM_006460	5HSAR023382	BR408616	1193	60	3	a	aaagtcgggggaggacgcggaagaggagctgtgggaagggggagga	a	ggg	46
CAPG	NM_001747	5HSAR023757	BR409441	143	60	3	t	gctggtggttggggcagccagagaagtaagagggaagtgagaagcc	t	ggg	46
HCN4	NM_005477	5HSAR023861	BR409589	676	60	3	c	gcgcctggagccgggcggcgcgccgcgcccctgaacgccagaggga	a	ggg	46
BRUNOL6	NM_052840	5HSAR024012	BR409967	248	60	3	a	gacggcgggacaggcgggaccagtgggaccggcgggagggctgaca	c	ggg	46
VPS35	NM_018206	5HSAR024050	BR410056	9	60	3	c	gcttggaggggccgcagcgtcacatgaccgcgggaggctacgcgcg	c	ggg	46
RARA	NM_001024809	5HSAR024435	BR411032	3	64	4	c	cggtggaaagggggtggtgcccggaggggagggggcgcgcagagct	t	gggg	46
STX16	NM_001001433	5HSAR013200	BR420522	642	60	3	t	ccagccgggccacgagaaagaaagtgaataaatcaggaatataagt	c	ggg	46
HSP90AA1	NM_005348	5HSAR030403	BR428382	34	60	3	a	ttcttccggaaggttcgggaggcttctggaaaaagcgccgcgcgct	c	ggg	46
PRRT2	NM_145239	5HSAR001576	BR348977	27	61	3	a	gccggaggctcgcgaggggcgggggcggcgacggcggcggagcgtag	a	ggg	47
NAB2	NM_005967	5HSAR003324	BR351803	205	61	3	g	cagaggcacagacagaggcgcggaggctcggagagagaagacgtgga	a	ggg	47
C21orf57	NM_058181	5HSAR003421	BR352074	18	61	3	a	tccgcccgctctcgcgtcctttgctgggtccagacaccggtacgtcc	c	ggg	47
UBE3C	NM_014671	5HSAR011337	BR376367	165	61	3	c	ctcgggtcgcctcccggccgccgcgtcctcgctgccccgggccgggc	c	ggg	47
KCNK1	NM_002245	5HSAR013684	BR383059	30	61	3	c	cgggcgcgcgggggagcgggcggcgggcgggagccaggcccgggcgg	c	ggg	47
AAK1	NM_014911	5HSAR014746	BR386435	90	61	3	a	gcggcgggtcagtctccgcccggcgctcccgggatcagctggcgggc	c	ggg	47
OBFC1	NM_024928	5HSAR018286	BR397195	46	61	3	c	ctcaggccggaactccagagacgacctcagccaactgctcctgcgcc	c	ggg	47
FGF19	NM_005117	5HSAR020239	BR402083	101	61	3	c	gtcaccccggctgggacaagaagccgccgcctgcctgcccgggcccg	a	ggg	47
BCL10	NM_003921	5HSAR030368	BR428274	332	61	3	c	aacaggatcggcccgcgggctggcgtcgataggctgccgcagagaca	c	ggg	47
MYO9A	NM_006901	5HSAR003177	BR351479	161	62	3	c	gtgcggcgggggatgtgcctgctcaggccgggcggagtctctctgaca	c	ggg	48
FAM108A2	XM_001722787	5HSAR004079	BR353917	45	62	3	c	cggccgggagccatggagcgcggccctggggcccgggggcgcgggccg	t	ggg	48
FAM108A1	NM_031213	5HSAR011971	BR378188	109	62	3	c	cggccgggagccatggagcgcggccctggggcccgggggcgcgggccg	t	ggg	48
SSBP3	NM_001009955	5HSAR013328	BR381931	258	62	3	a	gagcgcggcgaggagagcgccagcgagcgagagagcgagcgagcgccg	a	ggg	48
SSBP3	NM_018070	5HSAR013395	BR382139	145	62	3	a	gagcgcggcgaggagagcgccagcgagcgagagagcgagcgagcgccg	a	ggg	48
SSBP3	NM_145716	5HSAR013395	BR382146	145	62	3	a	gagcgcggcgaggagagcgccagcgagcgagagagcgagcgagcgccg	a	ggg	48
TARS	NM_152295	5HSAR014816	BR386654	97	62	3	a	cccgccttcccccgttatccattggctgctcgttccgccgcaagttgg	c	ggg	48
MOV10	NM_020963	5HSAR016378	BR391308	211	62	3	a	ccctgagggaggggtcagacgctttaggaaagagttaatgcgaagagg	a	ggg	48
APPL1	NM_012096	5HSAR016922	BR393032	26	62	3	c	gacggctgcagcccttgccggagagggcgggccggggtcagctgcggc	c	ggg	48
GPM6A	NM_005277	5HSAR017753	BR395600	5	62	3	a	gtctgtgcgcccgcagagtcgccaggcgccctgcgagttgtctccgct	a	ggg	48
ING1	NM_198219	5HSAR026981	BR418321	757	62	3	g	cgccgggagagcgagggctttgcattttgcagtgctattttttgaggg	c	ggg	48
CCND3	NM_001136017	5HSAR027990	BR421060	6	62	3	c	ggtgcgcggcgccggatgagcctcctggcctcgccgagggtgtacagg	t	ggg	48
PTEN	NM_000314	5HSAR030124	BR427523	465	62	3	c	agccggctgaggcgcggcggcggcggcggcacctcccgctcctggagc	g	ggg	48
SMAD6	NM_005585	5HSAR031551	BR431842	139	62	3	a	ggggcgacctcggcagcctcggcgcacgaagcgtccgagggcagcgtg	c	ggg	48
GLT8D3	NM_173601	5HSAR012343	BR379238	19	63	3	c	tagtccttcggctccggagccgcgactgcgctcgcctaggtggtgggcg	a	ggg	49
ZFP91	NM_053023	5HSAR012811	BR380723	31	67	4	a	ggaaagaggagcgcagggtgagagtgagccgcaggcttcgggaggcgag	c	gggg	49
USP32	NM_032582	5HSAR015356	BR388361	174	71	5	c	acgccgacaccgtcaccgtcacccagggacgccgaggagaaggcgggag	t	ggggg	49
ERLIN1	NM_001100626	5HSAR024853	BR412107	15	63	3	c	gccggctgttggcggcggttggctcggcgcgggagtcggctgcacgtgc	c	ggg	49
FBXW5	NM_018998	5HSAR029710	BR426270	38	63	3	c	ggcggcggtccgagcggctgcggcagcggaagcgggtccgggtcgcgca	c	ggg	49
REG3A	NM_138938	5HSAR029745	BR426375	1	63	3	a	tcccttcctcagggagcacaggaactctgagactcagcaagggtgtcct	a	ggg	49
C1orf51	NM_144697	5HSAR000188	BR345922	229	64	3	c	ggtgggggtagaaatgtctttttctattgtgtttgagaccggtaatattg	a	ggg	50
C2orf67	NM_152519	5HSAR009259	BR370476	35	64	3	c	agcggggcgcgctctggagacgagtcagcggcgccccgggtgggggaggc	c	ggg	50
RSPO1	NM_001038633	5HSAR010691	BR374567	83	64	3	t	gcgctggccccgagggcgtgagccgtccgcagattgagcaacttgggaac	c	ggg	50
GULP1	NM_016315	5HSAR011490	BR376793	43	64	3	t	gaggcgcgaagctccgaggccgggccgcggatactttaaagctcagagct	a	ggg	50
DNAJC4	NM_005528	5HSAR011935	BR378088	79	64	3	c	gcctgaatagacgcaggaaatggcgacggccgcgggtctgtgagcagcgg	c	ggg	50
KAAG1	NM_181337	5HSAR013215	BR381568	471	64	3	g	tagggatctgcatttcttcatatcaaccccacactatagggcacctaaat	t	ggg	50
C8orf42	NM_175075	5HSAR014624	BR386033	253	64	3	t	tctggtcctggggaaggtttgggggcgggtctggtcttcggaagggtttg	c	ggg	50
ACSS1	NM_032501	5HSAR015376	BR388427	736	64	3	c	ctccgggagggggccctggaggaatggatggtggcggaagggcggagcag	c	ggg	50
FLJ20674	NM_019086	5HSAR018425	BR397607	28	64	3	a	atcccgctcctgttgttttccgccggcaggagtaggctggcgggcgcagg	c	ggg	50
ARFGAP3	NM_014570	5HSAR020015	BR401654	25	64	3	c	gagggaaagcgagcggcgcctgcgccccggcggtggacgggcccggtcgt	c	ggg	50
ROM1	NM_000327	5HSAR022200	BR405883	58	64	3	g	ccgggccgcttggtaacccctccctgtccgggcctcgccgctcagtacgg	c	ggg	50
RPA1	NM_002945	5HSAR025253	BR413146	3	64	3	c	agcggtgcgcgcaacttctcgggccaataactgcgcagcgcgcgggaccc	t	ggg	50
CD34	NM_001773	5HSAR027358	BR419165	124	64	3	a	gagaagagaggaaaaaagcaagaatcccccacccctctcccgggcggagg	c	ggg	50
CD34	NM_001025109	5HSAR027358	BR419178	124	64	3	a	gagaagagaggaaaaaagcaagaatcccccacccctctcccgggcggagg	c	ggg	50
SH3YL1	NM_015677	5HSAR029895	BR426839	17	64	3	c	gcagcgcgccttcctcttcctgggcagcctcgggacggggcgccgcggcc	c	ggg	50
CUTA	NM_001014837	5HSAR001221	BR347992	298	65	3	c	ctcccgcggtcctgctcggcggagtggggcattcttcgggggtgcatcaga	a	ggg	51
PSD	NM_002779	5HSAR001738	BR349309	287	65	3	g	attagcgttgcctgagcggcgcgtagggggtagggggagggactgagaggc	c	ggg	51
LOC100132902	XM_001719496	5HSAR004401	BR354944	456	65	3	c	aggcggggccgagccgtaattgacgagctcttcattagaaaccaggcggga	c	ggg	51
LOC100132902	XM_001724458	5HSAR004746	BR356052	456	65	3	c	aggcggggccgagccgtaattgacgagctcttcattagaaaccaggcggga	c	ggg	51
C20orf201	NM_001007125	5HSAR012912	BR380928	73	65	3	c	cagggcccggtgccagccccggcaccgacgggacgccctcctccctccgca	c	ggg	51
AP3M2	NM_001134296	5HSAR013023	BR381159	102	65	3	c	gcggggcctgtccgcgcctaggagcagtgggcgctgagagcagcaaggcca	a	ggg	51
FIT1	NM_203402	5HSAR015858	BR389912	31	65	3	g	ccccatcagcccctcctcagctgcccagcaaagcaagcagttagtggggag	a	ggg	51
YY1AP1	NM_139119	5HSAR020175	BR401958	4	65	3	t	ggtgctggcggcggctgctttggcggcggttggtggccgtgcgggcgggga	a	ggg	51
OSBPL1A	NM_018030	5HSAR021044	BR403651	275	65	3	c	tctgcggccgagccagcggcggcggaggggcagcgcagacctctgcggccc	c	ggg	51
MTCH2	NM_014342	5HSAR021849	BR405211	29	65	3	g	cggggactgggcggagaggcgcgtgctgctgcgtgcgtgcgcgcgcgccgc	c	ggg	51
UBTF	NM_001076684	5HSAR025481	BR413818	8	65	3	a	agctgcggctgtgcccggccgagcgggggagggcgccgccactcagagcca	a	ggg	51
RASGRP4	NM_001146202	5HSAR026561	BR417042	12	69	4	a	ggccttcggtctctccccagcctcttccttccccctggcctgagggtgggt	a	gggg	51
RASGRP4	NM_001146203	5HSAR026561	BR417045	12	69	4	a	ggccttcggtctctccccagcctcttccttccccctggcctgagggtgggt	a	gggg	51
RASGRP4	NM_001146204	5HSAR026561	BR417049	12	69	4	a	ggccttcggtctctccccagcctcttccttccccctggcctgagggtgggt	a	gggg	51
RASGRP4	NM_001146205	5HSAR026561	BR417052	12	69	4	a	ggccttcggtctctccccagcctcttccttccccctggcctgagggtgggt	a	gggg	51
RASGRP4	NM_001146206	5HSAR026561	BR417058	12	69	4	a	ggccttcggtctctccccagcctcttccttccccctggcctgagggtgggt	a	gggg	51
RASGRP4	NM_001146207	5HSAR026561	BR417061	12	69	4	a	ggccttcggtctctccccagcctcttccttccccctggcctgagggtgggt	a	gggg	51
RASGRP4	NM_170604	5HSAR026561	BR417107	12	69	4	a	ggccttcggtctctccccagcctcttccttccccctggcctgagggtgggt	a	gggg	51
TLN1	NM_006289	5HSAR030375	BR428296	236	65	3	a	cgaggccggagcccgagggcgacccgagaagcggcggggcggcgggccggc	c	ggg	51
D4S234E	NM_014392	5HSAR002654	BR350557	620	66	3	c	cgcgtggtcccaggggaggctcccgcccagccccgcactcctttgtgcggcc	c	ggg	52
LOC100131824	XM_001724367	5HSAR004166	BR354192	577	66	3	t	ctgcagcagcagaaggcgccttaaaaaacagaagaaaggaaaagcagcctag	a	ggg	52
LOC100131824	XM_001721377	5HSAR004248	BR354448	577	66	3	t	ctgcagcagcagaaggcgccttaaaaaacagaagaaaggaaaagcagcctag	a	ggg	52
LOC100131824	XM_001724345	5HSAR004289	BR354577	572	66	3	t	ctgcagcagcagaaggcgccttaaaaaacagaagaaaggaaaagcagcctag	a	ggg	52
CTGLF6	XM_001716810	5HSAR006655	BR362242	1274	70	4	a	tggcaggcagggtggggcactgtgaggtgtcggggagggcattgtgaagtgt	t	gggg	52
CTGLF7	XM_001714786	5HSAR006659	BR362254	1274	70	4	a	tggcaggcagggtggggcactgtgaggtgtcggggagggcattgtgaagtgt	t	gggg	52
LOC100133472	XM_001714530	5HSAR006750	BR362566	832	70	4	a	tggcaggcagggtggggcactgtgaggtgtcggggagggcattgtgaagtgt	t	gggg	52
LOC650155	XM_939236	5HSAR006765	BR362623	1624	70	4	a	tggcaggcagggtggggcactgtgaggtgtcggggagggcattgtgaagtgt	t	gggg	52
HUNK	NM_014586	5HSAR015569	BR389021	74	66	3	c	atcctggtgtcctgaaaggggcccgggcgaccctaagaggaagaacttttgg	c	ggg	52
LOC390205	NM_001145077	5HSAR020587	BR402751	81	70	4	c	ggcccgggggccggcgcggctccggcaccgtcggggcggctggggggcggcc	c	gggg	52
BRSK1	NM_032430	5HSAR022532	BR406489	175	66	3	g	ccgggacggagcggtcgccggcccccaccggagagacggggcgacggccgca	g	ggg	52
OSTF1	NM_012383	5HSAR025327	BR413354	19	66	3	c	gcggagcactcggcggagccgctctgcctgcgtccgctcttcccgcagccaa	t	ggg	52
TEAD1	NM_021961	5HSAR026355	BR416427	287	66	3	t	gtggccgggcccagggaccgggagccggggagggagccgggcaccgagcaga	c	ggg	52
C9orf98	NM_152572	5HSAR027081	BR418622	409	66	3	c	ggcgacccgcgcgaccgaggatcgggtatctgggcccggcgcggagcctgca	c	ggg	52
P2RX7	NM_002562	5HSAR028153	BR421560	20	66	3	a	ggcttgctgtggccctgtcaggaagagtagagctctggtccagctccgcgca	a	ggg	52
BMP1	NM_006129	5HSAR029533	BR425738	85	66	3	c	agacaggaaggagggaggcgagcagagggaaggggaagaggtcggggagcga	c	ggg	52
BMP1	NM_006128	5HSAR029533	BR425934	85	66	3	c	agacaggaaggagggaggcgagcagagggaaggggaagaggtcggggagcga	c	ggg	52
BMP1	NM_001199	5HSAR029533	BR425993	85	66	3	c	agacaggaaggagggaggcgagcagagggaaggggaagaggtcggggagcga	c	ggg	52
ACTR3	NM_005721	5HSAR030703	BR429282	46	66	3	t	ggcaggagtgaggaggagggaagagagagggggaggaggccgcggcggggca	c	ggg	52
FAM36A	NM_198076	5HSAR000691	BR346882	291	67	3	c	acggggaggggcgcggccagccgggcttctgcttccgcgaccccggcggtgca	c	ggg	53
TMTC1	NM_175861	5HSAR002257	BR349934	293	67	3	c	tgagagaaagcccgggcaggagagcacagagccggcgactggacgcgagcgcg	c	ggg	53
ARL8A	NM_138795	5HSAR003886	BR353337	84	67	3	a	gccgctccgggccgcagcgcgagggcagcgaggggcggcggggacctggcacc	c	ggg	53
SEMA5B	NM_001031702	5HSAR009630	BR371545	46	67	3	c	tcggcagcgcatccagcggctgctgggagcccgagcgcagcgggcgcgggccc	t	ggg	53
ARHGAP11A	NM_199357	5HSAR012993	BR381096	186	67	3	c	caccgggactggaagagttgcctgagcagccggctggtccggcggccaggcta	c	ggg	53
ARHGAP11A	NM_014783	5HSAR012993	BR381157	186	67	3	c	caccgggactggaagagttgcctgagcagccggctggtccggcggccaggcta	c	ggg	53
GNG4	NM_001098722	5HSAR021216	BR403978	143	67	3	c	aggcgcggcgcggggcggggccggtgacgggacgcggagaccccgcgggcggc	a	ggg	53
CLK2	NM_003993	5HSAR028693	BR423190	119	67	3	c	cgggactgaagcggagcccgggaacggggcgggaggtcccagggtcccgggtt	g	ggg	53
PYCARD	NM_145182	5HSAR030116	BR427503	54	67	3	t	aggggaccaagggtgtagtaaggaagcgccttttgctggagggcaacggaccg	c	ggg	53
PYCARD	NM_013258	5HSAR030116	BR428290	54	67	3	t	aggggaccaagggtgtagtaaggaagcgccttttgctggagggcaacggaccg	c	ggg	53
CGREF1	NM_006569	5HSAR010792	BR374851	67	68	3	c	gcggcggctggcactggctccggactctgcccggccagggcggcggctccagcc	a	ggg	54
NR2F1	NM_005654	5HSAR012533	BR379760	1386	68	3	g	ctgcaaaaagagagaaagaaaacagcaggaaccacaacaaaacgccagcagggc	c	ggg	54
SH3GLB2	NM_020145	5HSAR012612	BR380239	2	68	3	c	caggcgggcaggccggcaggcgggtgcgcggagggctggtaccccgcagcaggt	c	ggg	54
EMP3	NM_001425	5HSAR020376	BR402347	109	68	3	a	aggaaggcggtgagagaggcgggggcctcgggagggtgaaaggagggaggagaa	c	ggg	54
RFWD2	NM_001001740	5HSAR021075	BR403709	182	68	3	a	gaggcggcggagggtcgaggtcgcggtccctctcctccgagcgcccggctggag	a	ggg	54
RFWD2	NM_022457	5HSAR021075	BR403721	182	68	3	a	gaggcggcggagggtcgaggtcgcggtccctctcctccgagcgcccggctggag	a	ggg	54
MBD2	NM_003927	5HSAR027387	BR419248	156	68	3	c	gcgggtctccgggattccaagggctcggttacggaagaagcgcagcgccggctg	a	ggg	54
MBD2	NM_015832	5HSAR027387	BR419306	156	68	3	c	gcgggtctccgggattccaagggctcggttacggaagaagcgcagcgccggctg	a	ggg	54
NAB2	NM_005967	5HSAR003324	BR351803	197	69	3	a	tgggggggcagaggcacagacagaggcgcggaggctcggagagagaagacgtgga	a	ggg	55
LOC727804	XM_001125843	5HSAR008080	BR366841	1140	69	3	g	aggcggggttggggggagatcggagcaggatgcacagcacacgagtgagcaaggg	a	ggg	55
MEIS3	NM_001009813	5HSAR010831	BR374955	240	77	5	c	ccggggtccatgcgcggagtccccacccggcccggcgcctgccgctgacggcggc	t	ggggg	55
MEIS3	NM_020160	5HSAR010831	BR374958	240	77	5	c	ccggggtccatgcgcggagtccccacccggcccggcgcctgccgctgacggcggc	t	ggggg	55
LYSMD1	NM_212551	5HSAR016041	BR390478	413	69	3	a	actgaatactcaagggacagatttgtggataagtagcttggagggaggagaaacc	a	ggg	55
POTEC	NM_001137671	5HSAR016397	BR391373	228	69	3	t	cgttgggtccccctggtgggcgtgggctttccccgggtgggtgtgggttttccct	t	ggg	55
DARS	NM_001349	5HSAR017682	BR395389	87	69	3	a	cggagactgggagggagggagaagcccctttggcctgccttacggaagcctgcga	a	ggg	55
CCDC85C	NM_001144995	5HSAR021856	BR405224	18	69	3	c	cgcaccgcgcagggggacggcgggggccgcgcctctgctccccagtcgccctcgg	c	ggg	55
PSME3	NM_176863	5HSAR021904	BR405320	20	69	3	a	cgagcgagagagcaagcaggcagcaggctgccggcgggcgggcggacggcacaga	a	ggg	55
PSME3	NM_005789	5HSAR021904	BR405440	20	69	3	a	cgagcgagagagcaagcaggcagcaggctgccggcgggcgggcggacggcacaga	a	ggg	55
GCNT1	NM_001490	5HSAR024720	BR411761	22	69	3	c	ccacgctggtgtgagggctgcaggcgcagctccggagcgcctagagcgcggcgcg	c	ggg	55
XPO1	NM_003400	5HSAR025618	BR414216	166	77	5	a	gaaccaccagtcgctgaggaacaagagaaggggggaaagtttaggcgagccttgg	g	ggggg	55
CDKN2D	NM_001800	5HSAR025782	BR414716	208	69	3	a	ctgttcgggccagcgcccgccggctgctccgcgctgacagcgccgggctggggcg	c	ggg	55
NRAS	NM_002524	5HSAR029556	BR425805	15	69	3	a	gcgggtctgggtgcggcctgccgcatgactcgtggttcggaggcccacgtggccg	c	ggg	55
FAM108A2	XM_001724669	5HSAR009214	BR370345	319	70	3	t	agctggtggtgctgaggtggccgaggacttgtccactcccaagggaaggtgctggt	a	ggg	56
NOMO3	NM_001004067	5HSAR010419	BR373828	24	70	3	c	gcctgggctgtcagccggcctaggaggaggaaggagcctgcggcgtgcagtgtgag	c	ggg	56
GDF7	NM_182828	5HSAR011906	BR378009	309	70	3	t	ggcgtagcgctgcggtgggaggaggcggctccggccctggtctccactctaggccg	t	ggg	56
GDF7	NM_182828	5HSAR011906	BR378009	371	74	4	t	ggcgcatagcggccgccggagctttcagcagggggcgctgctccgggcgttgggcg	t	gggg	56
C19orf12	NM_031448	5HSAR012372	BR379314	275	70	3	c	gccagcgccggggccgccaccaaggcctgcgcgaccctccgcggggctggggagct	c	ggg	56
SSBP3	NM_001009955	5HSAR013328	BR381931	250	70	3	g	agggaggggagcgcggcgaggagagcgccagcgagcgagagagcgagcgagcgccg	a	ggg	56
SSBP3	NM_018070	5HSAR013395	BR382139	137	70	3	g	agggaggggagcgcggcgaggagagcgccagcgagcgagagagcgagcgagcgccg	a	ggg	56
SSBP3	NM_145716	5HSAR013395	BR382146	137	70	3	g	agggaggggagcgcggcgaggagagcgccagcgagcgagagagcgagcgagcgccg	a	ggg	56
EED	NM_003797	5HSAR013598	BR382774	180	70	3	a	cggcgggaaaagggcaagacgggagttggggaagggaaggagccaggaagccgcgc	a	ggg	56
EED	NM_152991	5HSAR013598	BR382777	180	70	3	a	cggcgggaaaagggcaagacgggagttggggaagggaaggagccaggaagccgcgc	a	ggg	56
PPP2CB	NM_001009552	5HSAR014935	BR387017	177	70	3	c	gaagggcgggcgggggtctcctccaggctgcgcgctcggagccgcctgctgggctt	c	ggg	56
DOCK10	NM_014689	5HSAR017236	BR394019	61	70	3	t	aagagtgggggtgcaagagagaaaaacccgcctcttgcgagttgagcgaggaagag	g	ggg	56
STAT5B	NM_012448	5HSAR023019	BR407674	37	70	3	c	gacccagcgcaggcaactccgcgcggcggcccggccgagggagggagcgagcgggc	c	ggg	56
PSD	NM_002779	5HSAR001738	BR349309	125	71	3	t	gcacgtgagggtctggggaatagaaccaggggttccatgcgccctcctccttgtctg	c	ggg	57
LOC100132703	XM_001714789	5HSAR007710	BR365679	3062	71	3	a	gcaggcagcctggctctgaggctccaggtatgccccctgtgtggagctggggcagcg	c	ggg	57
RARA	NM_000964	5HSAR024422	BR411005	269	71	3	t	ggctccaggagactgagattagcctgccctctttggacagcagctccaggacagggc	t	ggg	57
RARA	NM_001145301	5HSAR024550	BR411331	380	71	3	t	ggctccaggagactgagattagcctgccctctttggacagcagctccaggacagggc	t	ggg	57
HDAC11	NM_001136041	5HSAR029911	BR426886	25	71	3	c	ggtgggctcccaggggtcccggtgggcgggcgcgctagggcgagggcggggacggcc	c	ggg	57
SLC25A23	NM_024103	5HSAR002231	BR349908	67	72	3	g	gagggggagccgcgaagcccccactgaggccgccgctgccgggcctcccctccccccc	c	ggg	58
TMEM30B	NM_001017970	5HSAR003095	BR351337	396	72	3	c	cgaggtgcggctcccggtgacccgcgggggtgcagcgcacctgggcggaggcggaact	a	ggg	58
RAB7L1	NM_003929	5HSAR014351	BR385182	59	72	3	a	cgtctagggaatcgaggtgccggctgctccttcctcacaatttggtttgtgctgcaag	a	ggg	58
FKBP2	NM_004470	5HSAR015239	BR387996	33	72	3	c	gctcgggaaagacccgtgccagcgggcgtgtggccgcgggtttcgcacggtccaataa	a	ggg	58
GNG4	NM_001098722	5HSAR021216	BR403978	97	72	3	a	tccgcctgcgcccccaggcccgcgtggtcgggccctgcagggcgggaggcgcggcgcg	c	ggg	58
RBM9	NM_014309	5HSAR022535	BR406492	43	72	3	a	ggtggggggaggaggaagaggtggggctctactctgattaattaccttaggcattcag	t	ggg	58
RBM9	NM_001031695	5HSAR022535	BR406493	43	72	3	a	ggtggggggaggaggaagaggtggggctctactctgattaattaccttaggcattcag	t	ggg	58
RBM9	NM_001082576	5HSAR022535	BR406495	43	72	3	a	ggtggggggaggaggaagaggtggggctctactctgattaattaccttaggcattcag	t	ggg	58
RBM9	NM_001082577	5HSAR022535	BR406501	43	72	3	a	ggtggggggaggaggaagaggtggggctctactctgattaattaccttaggcattcag	t	ggg	58
RDH10	NM_172037	5HSAR024322	BR410756	65	72	3	c	agtggccccgcgcaggcagggagcggcgccgcgcactccaacccggcgggcacctcgg	c	ggg	58
ATP2A2	NM_001135765	5HSAR030325	BR428144	323	72	3	t	tcaggagcccccaacccgccctgcggagctcggggccgcgcgaggggcggttgtctgg	a	ggg	58
ATP2A2	NM_170665	5HSAR030325	BR430413	323	72	3	t	tcaggagcccccaacccgccctgcggagctcggggccgcgcgaggggcggttgtctgg	a	ggg	58
ATP2A2	NM_001681	5HSAR030325	BR430443	323	72	3	t	tcaggagcccccaacccgccctgcggagctcggggccgcgcgaggggcggttgtctgg	a	ggg	58
LOC100132902	XM_001719496	5HSAR004401	BR354944	448	73	3	c	cgggcgggaggcggggccgagccgtaattgacgagctcttcattagaaaccaggcggga	c	ggg	59
LOC100132902	XM_001724458	5HSAR004746	BR356052	448	73	3	c	cgggcgggaggcggggccgagccgtaattgacgagctcttcattagaaaccaggcggga	c	ggg	59
LARP1	NM_033551	5HSAR011075	BR375632	104	73	3	a	agggacgggactagaagcctgccgggctcggggtgggggcgtcttgcgaggaacgggcg	g	ggg	59
C14orf180	NM_001008404	5HSAR012782	BR380662	112	73	3	c	cctggcccgttcacctgtgtgccctgcagttctgcccgaggctcaactctcaagggcct	a	ggg	59
MDGA1	NM_153487	5HSAR016966	BR393180	229	73	3	c	ggcggggacgaccaacttggggcgcggcgtagccccgctctcccgagagctcggagccc	a	ggg	59
C1orf65	NM_152610	5HSAR022744	BR406971	31	73	3	c	tgtctgcagcgtcctcgggaggtctcaggccccttgggcagacgctgcgcgtgcccaga	a	ggg	59
BACE2	NM_138991	5HSAR026949	BR418221	72	73	3	t	gagggcaggcgcaggtggaccccggcgccccccgagccccgctgtgaccttggccgcgg	a	ggg	59
BACE2	NM_138992	5HSAR026949	BR418240	72	73	3	t	gagggcaggcgcaggtggaccccggcgccccccgagccccgctgtgaccttggccgcgg	a	ggg	59
BACE2	NM_012105	5HSAR026949	BR419545	72	73	3	t	gagggcaggcgcaggtggaccccggcgccccccgagccccgctgtgaccttggccgcgg	a	ggg	59
MZF1	NM_198055	5HSAR031205	BR430777	394	73	3	t	ggaagggcaaggaggcgctcgagctggtgcgcggagcatcctgggagacgtagtccagc	a	ggg	59
LOC650770	XM_001718594	5HSAR009245	BR370430	229	74	3	t	cctggggtccccctggtgggcgtgggctttccccgggtgggtgtgggttttccctgggtg	t	ggg	60
POTEB	NM_207355	5HSAR016405	BR391395	141	74	3	t	cgtggggtccccctggtgggcgtgggctttccccgggtgggtgtgggttttccctgggtg	t	ggg	60
MTCH2	NM_014342	5HSAR021849	BR405211	20	74	3	c	acgggggggcggggactgggcggagaggcgcgtgctgctgcgtgcgtgcgcgcgcgccgc	c	ggg	60
PHPT1	NM_014172	5HSAR023495	BR408900	163	74	3	a	gggaggccttcgggcggtgggagggggagagagggaggcctttgggcggtgggggccacg	a	ggg	60
PHPT1	NM_001135861	5HSAR023495	BR408956	163	74	3	a	gggaggccttcgggcggtgggagggggagagagggaggcctttgggcggtgggggccacg	a	ggg	60
TAOK2	NM_016151	5HSAR025439	BR413698	148	74	3	c	agtgggggctgtcaccctcggaccccggcgtgagaggggccgtgcggccggacgtcctcg	t	ggg	60
TAOK2	NM_004783	5HSAR025439	BR413720	148	74	3	c	agtgggggctgtcaccctcggaccccggcgtgagaggggccgtgcggccggacgtcctcg	t	ggg	60
ROCK2	NM_004850	5HSAR028666	BR423113	199	74	3	c	gacgccgtctgttccccgccgctcccggcagggccgggccgggctgggccgggctgggcc	c	ggg	60
ADAM10	NM_001110	5HSAR030474	BR428608	170	74	3	g	agagaagagggaacgagcaagggaaggaaagcggggaaaggaggaaggaaacgaacgagg	a	ggg	60
MAGIX	NM_001099680	5HSAR003171	BR351469	291	75	3	c	cacgcagcgaaggggcaggcctgaaatgtgagtcacgggggtggagcctatagtcccatgg	c	ggg	61
LOC728125	XM_001718554	5HSAR007662	BR365540	363	75	3	a	aagtgagacagccagcagcacaaggacagaaagaggaaagagcaagtctgcagctctagaa	a	ggg	61
LOC100132703	XM_001714789	5HSAR007710	BR365679	2994	75	3	a	aagtgagacagccagcagcacaaggacagaaagaggaaagagcaaggctgcagctctagaa	a	ggg	61
FLJ36031	NM_175884	5HSAR011388	BR376505	47	75	3	t	cgccggccgccatcttgtaccgggcagcaggatattcgcccgcgtcctccgccctcggagg	a	ggg	61
PANK3	NM_024594	5HSAR014748	BR386440	45	75	3	g	ccccggagcggcgaggccggcggccttccccagcttgctcggtcccggccacccctcgcgg	t	ggg	61
ACSS1	NM_032501	5HSAR015376	BR388427	725	75	3	t	acccgggcgggctccgggagggggccctggaggaatggatggtggcggaagggcggagcag	c	ggg	61
LRP5L	NM_182492	5HSAR015781	BR389683	1904	75	3	a	agagagcttcagggatgaggtggcgttgagctgggcgggaagggtgagcccctgcaaggtg	t	ggg	61
SAR1A	NM_020150	5HSAR016685	BR392285	2	75	3	a	gtgtgacgtacatccggcgagtagctggcggtcccgggtgctgctggttagtgtgctctga	a	ggg	61
ACBD5	NM_145698	5HSAR024709	BR411736	65	75	3	a	cacggactgacagacggactccggcggaatggggggtgtggctgctccgccagggtcccca	t	ggg	61
LAPTM4A	NM_014713	5HSAR024863	BR412134	323	75	3	t	taagccgaagtcgctgcgctcagtgcgcaggcgcgaagaagctggcaggggcacgagccgg	c	ggg	61
GATA2	NM_001145661	5HSAR026736	BR417570	163	75	3	a	aacggtctgggagtcggcagctggcgccagggcggccggaggatgccgaggggccggagcc	a	ggg	61
VEGFC	NM_005429	5HSAR029339	BR425095	238	75	3	a	cgccctgcaaagttgggaacgcggagccccggacccgctcccgccgcctccggctcgccca	g	ggg	61
PSD	NM_002779	5HSAR001738	BR349309	276	76	3	c	gggtgggggggattagcgttgcctgagcggcgcgtagggggtagggggagggactgagaggc	c	ggg	62
TMBIM6	NM_001098576	5HSAR015985	BR390306	251	76	3	c	tcctttggtcgggctgaccctgggtgagcggcccggagccaagactcgaggtagggcctggc	c	ggg	62
AGPAT1	NM_006411	5HSAR021137	BR403828	19	76	3	a	gtggcgggggaatagcggcggcagcagccccagccctcagagagacagcagaaagggaggga	a	ggg	62
ROM1	NM_000327	5HSAR022200	BR405883	46	76	3	c	cccgagggggggccgggccgcttggtaacccctccctgtccgggcctcgccgctcagtacgg	c	ggg	62
CLDN5	NM_001130861	5HSAR022348	BR406173	425	76	3	t	gcttggaccccggggcgggctttctggagagcccccctacgagggcctctacggcggtgacg	t	ggg	62
TADA3L	NM_006354	5HSAR027190	BR418931	355	76	3	c	ggtcgcactagggtgtccctagagaacgaggactctgaaggcgggacatttgggcgaccccc	c	ggg	62
TADA3L	NM_133480	5HSAR027190	BR418946	355	76	3	c	ggtcgcactagggtgtccctagagaacgaggactctgaaggcgggacatttgggcgaccccc	c	ggg	62
LMO4	NM_006769	5HSAR028129	BR421492	303	76	3	a	aggaaggcggcggcggaggaggaggaggagcgggaggagcgcgggcgggggcgggggccccc	c	ggg	62
KIAA0494	NM_014774	5HSAR010823	BR374931	149	77	3	c	agcgctttcggtcggccgagccgccgtcgcccgcggcaccgtgtccccaaggcccagacagcg	c	ggg	63
ABHD1	NM_032604	5HSAR012197	BR378830	17	77	3	c	gccagcagcgcaaactgcctgcagcggggaccggacctgcacaggccgcctatggcgggcggc	t	ggg	63
GAP43	NM_002045	5HSAR013823	BR383496	249	77	3	a	agggagagagagcgcgctagcgcgagagagcgagtgagcaagcgagcagaaaagaggtggaga	g	ggg	63
AASDHPPT	NM_015423	5HSAR015896	BR390028	12	77	3	a	ctgtcggtgggccagtctgcgtagcgacggcccgtcccctgcgcacggacgccgggaagaagg	t	ggg	63
RALB	NM_002881	5HSAR017731	BR395536	9	77	3	t	aaagcgagcccggcagctcaatgacaaatcggtggaggacggctggggtccggccccgggagg	c	ggg	63
OSBPL10	NM_017784	5HSAR019682	BR401009	16	77	3	c	tccatatccgggtggaccgggtgggtgaggctgcccctccctccaggtcccgaggtggataag	t	ggg	63
TAL1	NM_003189	5HSAR021984	BR405472	146	77	3	a	gttgttgttgctgttggactaaatagctattcctgattggtcatgtatagggttttttaaggc	t	ggg	63
ZNF496	NM_032752	5HSAR001141	BR347772	219	78	3	c	ctgggaggatgaggacggctgccctggacttccgccgccacaggagggttttcggccggacgcc	a	ggg	64
UBE3C	NM_014671	5HSAR011337	BR376367	148	78	3	a	tacagcccgggggcgggctcgggtcgcctcccggccgccgcgtcctcgctgccccgggccgggc	c	ggg	64
SREBF2	NM_004599	5HSAR024352	BR410827	72	78	3	c	ggttgtcgggtgtcatgggcggtggcgacggcaccgcccccgcgtctccctgagcgggacggca	g	ggg	64
JAG2	NM_002226	5HSAR026807	BR417788	316	78	3	c	cgggcgctgggaggccggcgcggcggctgggagccgggcgcgggcggcggcggcggggccgggc	c	ggg	64
THAP11	NM_020457	5HSAR027301	BR419080	96	78	3	c	ccggctgcgccgagcggcagtggtgggataccacccaaggcctcgcgcggcgccgcccgtcgag	c	ggg	64
JAG2	NM_145159	5HSAR026807	BR419795	316	78	3	c	cgggcgctgggaggccggcgcggcggctgggagccgggcgcgggcggcggcggcggggccgggc	c	ggg	64
LOC100132902	XM_001719496	5HSAR004401	BR354944	384	79	3	t	agcagacgggctgtgcgcaggtttcagcgggccaatggaaggccggccaggcgcccggggcgggc	c	ggg	65
LOC100132902	XM_001724458	5HSAR004746	BR356052	384	79	3	t	agcagacgggctgtgcgcaggtttcagcgggccaatggaaggccggccaggcgcccggggcgggc	c	ggg	65
ITPRIPL2	NM_001034841	5HSAR012845	BR380790	223	79	3	c	gagggccgctgggccggactcagcgcgcagccggggcagggcgcggcccggggcccgagagcgca	c	ggg	65
AAK1	NM_014911	5HSAR014746	BR386435	72	79	3	c	agcgcgcgcgggggaggggcggcgggtcagtctccgcccggcgctcccgggatcagctggcgggc	c	ggg	65
MT3	NM_005954	5HSAR017726	BR395520	25	79	3	c	cgacagatgcagtgcgtgcgccggagcccaagcgcacaaacggaaagagcgggcgcggtgcgcag	c	ggg	65
CELSR3	NM_001407	5HSAR017732	BR395539	169	83	4	c	gcccggggcggcggcaggggcccgggagggggcccgagcggcggggccagcccaaggcccggacc	c	gggg	65
THSD1	NM_018676	5HSAR018690	BR398392	232	79	3	c	aaccgaccacgcccggtcccgtgtgccccccgccctcccggcgcccgccctccccacgccgtcgg	c	ggg	65
THSD1	NM_199263	5HSAR018690	BR398395	232	79	3	c	aaccgaccacgcccggtcccgtgtgccccccgccctcccggcgcccgccctccccacgccgtcgg	c	ggg	65
PRKD2	NM_001079882	5HSAR023548	BR409039	172	79	3	a	ggcaggcaggaagcgagggcctgcggggtctctgcgtttccgggggaaacagccggccctgccct	a	ggg	65
SFXN3	NM_030971	5HSAR000375	BR346304	321	80	3	t	cgcggccgggaagctcctgcccctccctgctggtcggcgtcacgcgtgacgtcccgcgtgatggct	a	ggg	66
DENND1A	NM_020946	5HSAR000413	BR346377	104	80	3	c	ccccagcctgagggaagggaggaaggggcggggagagcgccagagggaggccggtcggccgcgggc	c	ggg	66
DENND1A	NM_024820	5HSAR000413	BR346576	104	80	3	c	ccccagcctgagggaagggaggaaggggcggggagagcgccagagggaggccggtcggccgcgggc	c	ggg	66
RFX2	NM_000635	5HSAR011829	BR377795	9	80	3	c	ccgttaggaaggtggggcgcggagcctggtaaccgttgccggtaacaacgccccgccccgtcgggc	c	ggg	66
MDS1	NM_004991	5HSAR012488	BR379631	233	80	3	a	agagagagagagagagagagagagagagagagagagagagagagagagagagagacaggagagaga	a	ggg	66
POLR1B	NM_019014	5HSAR017197	BR393897	268	80	3	c	gagcgggtttccacctgcggcatctttcgcgagcggggagatgagtggggcggaatatgggagaaa	a	ggg	66
POLR1B	NM_001137604	5HSAR017197	BR393907	268	80	3	c	gagcgggtttccacctgcggcatctttcgcgagcggggagatgagtggggcggaatatgggagaaa	a	ggg	66
TTC39A	NM_001080494	5HSAR018629	BR398209	14	80	3	a	aggaggccttggagaaggaggagggaaaaaggggctgtgggatttagtggctgggctgcaccccct	g	ggg	66
DBF4	NM_006716	5HSAR021562	BR404656	144	84	4	c	cgcgcagcgcgagaaggcaggcacgaggggcgagcgcgaggcggggcacggcgcgtggcgtgagac	c	gggg	66
A2BP1	NM_001142333	5HSAR028886	BR423758	311	80	3	t	gaaacccgaactcgcggaggggaatccctccccctccgccccagccccccagcagcacccgcggtg	c	ggg	66
A2BP1	NM_018723	5HSAR028886	BR424122	311	80	3	t	gaaacccgaactcgcggaggggaatccctccccctccgccccagccccccagcagcacccgcggtg	c	ggg	66
ATP2A2	NM_001135765	5HSAR030325	BR428144	315	80	3	a	agggtgggtcaggagcccccaacccgccctgcggagctcggggccgcgcgaggggcggttgtctgg	a	ggg	66
ATP2A2	NM_170665	5HSAR030325	BR430413	315	80	3	a	agggtgggtcaggagcccccaacccgccctgcggagctcggggccgcgcgaggggcggttgtctgg	a	ggg	66
ATP2A2	NM_001681	5HSAR030325	BR430443	315	80	3	a	agggtgggtcaggagcccccaacccgccctgcggagctcggggccgcgcgaggggcggttgtctgg	a	ggg	66
PRPF40B	NM_012272	5HSAR000128	BR345813	86	81	3	a	cgagggaggccaagggtgagggaagagagcccgggaggggggatgggggcggggactgggggcgaag	c	ggg	67
ZNF7	NM_003416	5HSAR001142	BR347776	13	81	3	c	gcggacgcgggtggccaaggcccgtttccggcggcgtcgcgcgtttgcgagcctcgggtggtcctca	a	ggg	67
NLE1	NM_001014445	5HSAR002011	BR349688	65	81	3	c	gggcgtcgccgcggggcgctagggcccgggtccctgaggcctgagagaggcgaagtggggcccttct	c	ggg	67
ZNF436	NM_030634	5HSAR002242	BR349919	100	81	3	a	acccagccagggggctgtcctagtagattccggcattgcctccaccccgctgtggcggagacgcaga	c	ggg	67
ATP8B2	NM_001005855	5HSAR015244	BR388013	42	81	3	c	agcccgtggggagccgagccgagcgccccccgccccagcccccggcatgggcagtacggggccgccg	c	ggg	67
ZADH2	NM_175907	5HSAR019448	BR400544	139	81	3	a	cgccggccggaggaggggcggacccgcccgccctagccgagcagagcacagccgagccgagcggccc	c	ggg	67
PHF16	NM_014735	5HSAR020364	BR402326	93	81	3	c	agctgaggcgcggggggcggccccggcggggggcgggggcgaggaggggattaaggggcaggtgcga	a	ggg	67
PNMT	NM_002686	5HSAR021244	BR404038	79	81	3	t	gaggatgcggcgcacatggccccgggcggctcggcggtcagctgccgcccccacagcggaccggtcg	c	ggg	67
ZBTB22	NM_005453	5HSAR021821	BR405159	53	81	3	c	gggggcccgggggcgcgcggcccgagacccccccggccgccctcctcctttctttgttcctgtggct	g	ggg	67
ZNF165	NM_003447	5HSAR024188	BR410412	782	85	4	t	gctgtcctactgatcctgaatttggggtcactggtaagaggagttgcccattccagccaggtggaac	a	gggg	67
CDKN2D	NM_001800	5HSAR025782	BR414716	134	81	3	a	ccggggtctcgggctggggagccgggacgggagagcagcgcagccgggtgcaccgcggccgcgcccc	a	ggg	67
RAB28	NM_004249	5HSAR029973	BR427063	31	81	3	c	gaggtgggcaagatggcgcttgccgagtgattctcctcgaatacctcctgccggcgcggagacaccg	c	ggg	67
RAB28	NM_001017979	5HSAR029973	BR427065	31	81	3	c	gaggtgggcaagatggcgcttgccgagtgattctcctcgaatacctcctgccggcgcggagacaccg	c	ggg	67
RAB28	NM_001159601	5HSAR029973	BR427078	31	81	3	c	gaggtgggcaagatggcgcttgccgagtgattctcctcgaatacctcctgccggcgcggagacaccg	c	ggg	67
AP4B1	NM_006594	5HSAR001800	BR349438	75	82	3	a	gtctgcggtcagtcggacgcggcgctggaaatccggcggaggacctagaagtagcgggagcgatctgt	c	ggg	68
PIP4K2B	NM_003559	5HSAR015676	BR389356	256	86	4	c	tgcggagcgggccggcgggctccccggggcggggcgggagggcggggcgtggggcggacggaaccacc	c	gggg	68
MOV10	NM_020963	5HSAR016378	BR391308	191	82	3	a	agcttggggtaaggggagggccctgagggaggggtcagacgctttaggaaagagttaatgcgaagagg	a	ggg	68
IRF2BP1	NM_015649	5HSAR017614	BR395192	108	82	3	c	ggcgccgacgtgcctcagcctgccttcgcgagggaggcgggagtgagcagaaaggcttagggcccagg	c	ggg	68
OBFC1	NM_024928	5HSAR018286	BR397195	100	82	3	c	gtcgtcgccgccagcggctccgagcgccggaagggccaggtctcagggctcctggagctgcaggcggc	a	ggg	68
STX4	NM_004604	5HSAR019790	BR401221	128	82	3	a	aggggagtgtcagagtgtgagcggggtacgggaattccaaatttgagggcctcccggctctggcgccg	a	ggg	68
WDTC1	NM_015023	5HSAR026362	BR416448	169	82	3	a	gagtgcgtgtgtgagagcgcgcgagggagtgtgagtgtgtgtgagcgcgggtgtgaggcggtgcgcag	c	ggg	68
S100A10	NM_002966	5HSAR029337	BR425090	138	82	3	t	gatgccctgaaatattcgagagcaggaccgtttctactgaagagaagtttacaagaacgctctgtctg	c	ggg	68
PRNP	NM_001080123	5HSAR029693	BR426218	29	82	3	c	ggcaggggagccgcgggggccgagtgaggaccccgggcctcgggtcccaggcgcaagggtgcccggcc	c	ggg	68
LRRC37A3	NM_199340	5HSAR001057	BR347639	407	83	3	c	attgtgacataagagtgccctggtgacatggagcagatctgtggcataaataaaggtgtcataaagaca	c	ggg	69
FOXA3	NM_004497	5HSAR001256	BR348100	19	83	3	c	ggtgtcccggctataaagcgtggccgcctcccgcggcgctcgggacagccgtaccccgggcggtcggac	c	ggg	69
NUS1	NM_138459	5HSAR003911	BR353405	107	83	3	c	gggacgcggagcgatggcccgcgccggccgcaggggcggataaaaagccgtcgcgctgcgggagtgggc	a	ggg	69
CBLB	NM_170662	5HSAR018270	BR397152	23	83	3	t	gtgtccagcgagcggtctcctcctcctgctagtgctgctgcggcgtcccgcggcctccccgagtcgggc	a	ggg	69
NDUFA4L2	NM_020142	5HSAR001370	BR348432	121	84	3	t	gtgagtccaaagaagcacgggctgggccaagctaagctgctctgggctgggctgatccctccccactcag	c	ggg	70
C9orf64	NM_032307	5HSAR010344	BR373629	132	84	3	c	accttgtttaggccctgtgatcgcgcggttcgtagtagcgcaaggcgcagagtggaccttgacccgccta	c	ggg	70
ZWILCH	NM_017975	5HSAR016440	BR391510	163	84	3	c	gccatgacccctgacgtcgccggtccggcgcgcagttcagtttggcggttccggtaccgctctcacattg	c	ggg	70
ZNF696	NM_030895	5HSAR017686	BR395402	18	84	3	c	gaccgtagcgggtgcagtccagctgctctggacgctgaggccccggcttctcttgctggggtgtcgattc	a	ggg	70
ROM1	NM_000327	5HSAR022200	BR405883	38	84	3	a	ggggcgggcccgagggggggccgggccgcttggtaacccctccctgtccgggcctcgccgctcagtacgg	c	ggg	70
INTS6	NM_012141	5HSAR024231	BR410515	251	84	3	t	gtggggagccaggcccgtctcccgctgggacacacacaggggccgggagcggggacgggacccccgaggc	g	ggg	70
INTS6	NM_001039938	5HSAR024231	BR416758	251	84	3	t	gtggggagccaggcccgtctcccgctgggacacacacaggggccgggagcggggacgggacccccgaggc	g	ggg	70
GRIN3A	NM_133445	5HSAR027088	BR418641	295	84	3	c	cagggaacgggcgctccagctgcgggtgacaggcgccggcccgcccgcctgcctgctcagcgcagtgacc	c	ggg	70
CLK2	NM_003993	5HSAR028693	BR423190	102	84	3	c	gacggagccggggcgggcgggactgaagcggagcccgggaacggggcgggaggtcccagggtcccgggtt	g	ggg	70
KCNIP2	NM_173191	5HSAR030864	BR429719	4	84	3	t	gggcgggggtagggggagccaatcccggcagcgccaaagaggggaggaggcggtgacagccgcggggagg	c	ggg	70
KCNIP2	NM_014591	5HSAR030864	BR429748	4	84	3	t	gggcgggggtagggggagccaatcccggcagcgccaaagaggggaggaggcggtgacagccgcggggagg	c	ggg	70
KCNIP2	NM_173193	5HSAR030864	BR429813	4	84	3	t	gggcgggggtagggggagccaatcccggcagcgccaaagaggggaggaggcggtgacagccgcggggagg	c	ggg	70
KCNIP2	NM_173192	5HSAR030864	BR430294	4	84	3	t	gggcgggggtagggggagccaatcccggcagcgccaaagaggggaggaggcggtgacagccgcggggagg	c	ggg	70
KCNIP2	NM_173197	5HSAR030864	BR430351	4	84	3	t	gggcgggggtagggggagccaatcccggcagcgccaaagaggggaggaggcggtgacagccgcggggagg	c	ggg	70
C1orf144	NM_001114600	5HSAR003855	BR353251	62	85	3	c	gtccattgagtaaagccttgcgtgcctgcgcccgcgacggaggcgcgcttcaaagcgcaggcgcggggagg	t	ggg	71
CTGLF6	XM_001716810	5HSAR006655	BR362242	1237	85	3	t	gcagccaaggcaggggcattctgagctgttggggaggggtggcaggcagggtggggcactgtgaggtgtcg	a	ggg	71
CTGLF7	XM_001714786	5HSAR006659	BR362254	1237	85	3	t	gcagccaaggcaggggcattctgagctgttggggaggggtggcaggcagggtggggcactgtgaggtgtcg	a	ggg	71
LOC100133472	XM_001714530	5HSAR006750	BR362566	795	85	3	t	gcagccaaggcaggggcattctgagctgttggggaggggtggcaggcagggtggggcactgtgaggtgtcg	a	ggg	71
LOC650155	XM_939236	5HSAR006765	BR362623	1587	85	3	t	gcagccaaggcaggggcattctgagctgttggggaggggtggcaggcagggtggggcactgtgaggtgtcg	a	ggg	71
C1orf2	NM_006589	5HSAR009363	BR370777	490	85	3	t	ctctagagcgagtggggtggagaggagaaaggacggggccttgggcgcctctgagatgctcccaagtgcca	a	ggg	71
C1orf2	NM_198264	5HSAR009363	BR370780	490	85	3	t	ctctagagcgagtggggtggagaggagaaaggacggggccttgggcgcctctgagatgctcccaagtgcca	a	ggg	71
C1orf144	NM_015609	5HSAR010577	BR374258	62	85	3	c	gtccattgagtaaagccttgcgtgcctgcgcccgcgacggaggcgcgcttcaaagcgcaggcgcggggagg	t	ggg	71
FTSJD1	NM_018348	5HSAR012249	BR378975	282	85	3	c	tccggacagccttccccccagtccggcgcaccatctccctgccttgtggctggaggcgccgcggacccaaa	a	ggg	71
FTSJD1	NM_001099642	5HSAR012250	BR378977	88	85	3	c	tccggacagccttccccccagtccggcgcaccatctccctgccttgtggctggaggcgccgcggacccaaa	a	ggg	71
MDS1	NM_004991	5HSAR012488	BR379631	155	85	3	a	agagagagtgaaagaagaaaatacagagagtgagtgtgtggaagagagagagaaacaggagagaaacagga	a	ggg	71
MUT	NM_000255	5HSAR017066	BR393498	39	85	3	a	cggtgtcggcctacgcccccagagtcgtccggctgacgctggcggtggcgcggtttgtgtgggcttggtga	c	ggg	71
RAB11FIP2	NM_014904	5HSAR017439	BR394658	1	85	3	c	cgggaggcgcggaggcagcggaggctgctcggccgcaaggaggcaggcgggaggccaggggtgcagaattg	c	ggg	71
ADCY6	NM_020983	5HSAR020988	BR403541	16	85	3	c	acggccaggacgcgcgggctcggaggaccgcgggacggccggccggccggccggagcccgcgggggcggcg	c	ggg	71
RHOQ	NM_012249	5HSAR023319	BR408453	194	85	3	g	cggccctgcggcgcggagcggcggcgacggcggcggaccccccaggcgggctggggctgagcccggggccg	c	ggg	71
ARRB2	NM_004313	5HSAR025141	BR412837	22	85	3	c	cagcgccgcggcgcgcgcgatccggctgacgcatctggccccggttccccaagaccagagcggggccggga	a	ggg	71
PIM3	NM_001001852	5HSAR025596	BR414158	196	85	3	c	gtcccgattcgccccgcccccgcggagggatacgcggcgccgcggcccaaaacccccgggcgaggcggccg	c	ggg	71
NFE2L2	NM_006164	5HSAR029604	BR425944	284	85	3	t	ggattttcggaagctcagcccgcgcggccggcgggggaaggaagggcccggactcttgccccgcccttgtg	c	ggg	71
BAG5	NM_001015048	5HSAR001870	BR349547	110	86	3	c	gctgccgggcccgggcgactgccggagctgcggaagtcgtggaagcgtcggcgacgcatcgcgcgatggcgc	c	ggg	72
NUS1	NM_138459	5HSAR003911	BR353405	25	90	4	c	ctgccaagggaggaggaagatggcggcgggggcgaggtgaggtgttggcagtggaaaggggttcgggctcgg	c	gggg	72
AASDHPPT	NM_015423	5HSAR015896	BR390028	3	86	3	c	ctgggagggctgtcggtgggccagtctgcgtagcgacggcccgtcccctgcgcacggacgccgggaagaagg	t	ggg	72
SACM1L	NM_014016	5HSAR022533	BR406490	87	86	3	t	aagaggctgggagctgcggccgctgtgccagggtgaccggtagagttgtagccgaggtggcggcgcggggcg	c	ggg	72
CLDN9	NM_020982	5HSAR026677	BR417386	23	86	3	c	agtgtgcgatactcggggagctggggcatgtttgcatcacgaaactcggctgggggagagcagaggcagctg	a	ggg	72
FOXA3	NM_004497	5HSAR001256	BR348100	95	87	3	c	cgccggtgggagctcgggccgtgcccgctgagagatccagagcgctccgttcccccggggccggagcgggggc	t	ggg	73
LOC100132675	XM_001720128	5HSAR006390	BR361363	200	87	3	t	cagcaggggtgcagggagaggcaggtgcatgctgggagatcggaccctgtgagggctgtgggggcgtcaggtg	t	ggg	73
LOC100132165	XM_001718028	5HSAR006424	BR361483	200	87	3	t	cagtaggggtgcagggagaggcaggtgcatgctgggaggtcggaccctgtgagggctgtgggggcgtcaggtg	t	ggg	73
LOC647515	XM_001714180	5HSAR006517	BR361783	200	87	3	t	cagcaggggtgcagggagaggcaggtgcatgctgggagatcggaccctgtgagggctgtgggggcgtcaggtg	t	ggg	73
LOC647515	XM_001718750	5HSAR006588	BR362019	200	87	3	t	cagcaggggtgcagggagaggcaggtgcatgctgggagatcggaccctgtgagggctgtgggggcgtcaggtg	t	ggg	73
LOC100133217	XM_001720995	5HSAR006596	BR362046	200	87	3	t	cagtaggggtgcagggagaggcaggtgcatgctgggaggtcggaccctgtgagggctgtgggggcgtcaggtg	t	ggg	73
LOC100129803	XM_001715297	5HSAR008885	BR369177	26	87	3	c	aactgtcactacccgggtccgccgtcccctaggaaagagctccgacgattggagctttgggggccggggatgg	t	ggg	73
NR2F1	NM_005654	5HSAR012533	BR379760	1286	87	3	t	gaggggggaaggagagcgcggcccccccaggaacggagcgcggggggagcgggcgaggggagcaggggtgttg	g	ggg	73
CDS2	NM_003818	5HSAR014818	BR386660	77	87	3	t	gccgagctccagggctggctgctgggctgctaagggaactgtgagccgctcagagccgcgcgcctcccgggcg	c	ggg	73
RDH8	NM_015725	5HSAR016592	BR391996	156	87	3	a	ggttaggagggagcagatgagcccaggatgaatggtcagagtcaggtgctgcccggcggaggtcacgagtcca	a	ggg	73
NAIF1	NM_197956	5HSAR016806	BR392667	125	87	3	t	tgaggggcgaggctgaggaagaagagaaggggaattggggcgcttgaggggattataatttctttaaaaagag	a	ggg	73
ANKRD40	NM_052855	5HSAR018247	BR397080	131	87	3	c	cgagttccgcgctccctccccatggccgggagcgggccgcggcgacggcggcggcgctgacaggccccgggcg	c	ggg	73
SMARCC1	NM_003074	5HSAR021343	BR404228	3	87	3	c	gccgggaagcggcagtggcggctacgcgcgcgggggtgcgcgcgggaacgaccgggaaacaccgcgagggccg	t	ggg	73
EIF6	NM_181468	5HSAR021351	BR404245	2	87	3	a	tcagctccggtcctgggtcgggaggggtgggggccagaggattcagggccggaggttctggtgggggcccagt	c	ggg	73
CCDC85C	NM_001144995	5HSAR021856	BR405224	80	87	3	c	gccgggcctcggagacccgcccactctccgcccggggtgggcggggcggcgggggctccgggagctgggccgg	c	ggg	73
RDH10	NM_172037	5HSAR024322	BR410756	130	87	3	c	cgcggggcgcagccttctcgtcccggcctctgtgacaagcgccccggagccgggagcccgattgccgggctcg	t	ggg	73
PODNL1	NM_024825	5HSAR026621	BR417223	42	87	3	g	accaaggggacgggctggcctgtcctcaccaccccatccggccgcctgcccgtcctccccagggcggggaagg	t	ggg	73
SMARCA4	NM_003072	5HSAR027019	BR418436	25	87	3	a	gagccggcgagcgcgcgcgcagcgggggcgcgggtggcgcgcgtgtgtgtgaagggggggcggtggccgaggc	c	ggg	73
SMARCA4	NM_001128844	5HSAR027026	BR418456	25	87	3	a	gagccggcgagcgcgcgcgcagcgggggcgcgggtggcgcgcgtgtgtgtgaagggggggcggtggccgaggc	c	ggg	73
WASL	NM_003941	5HSAR031258	BR430935	28	87	3	a	ttgggggaggagttgggagtttagcgcagtcgccggagtgcgaggacaacgaccatccggccctagcctggcc	c	ggg	73
XPO6	NM_015171	5HSAR013991	BR384042	202	88	3	c	ggtcccgagcagctgccctcctcgccggcatccgagcctcatttcctgctttttcagtttccttggggaggggc	t	ggg	74
PAK3	NM_002578	5HSAR015445	BR388645	50	88	3	c	cagctgtgccagctaaccgtctgggatctcgcactgggggctgcagcttttccccgcctcgagccagtgtgcgg	c	ggg	74
PPAP2A	NM_003711	5HSAR017194	BR393888	218	88	3	a	ccccgggcgccattgctggcggtgggagcgccgcccggtctcagcccgccctcggctgctctcctcctccggct	a	ggg	74
PPAP2A	NM_176895	5HSAR017194	BR393900	218	88	3	a	ccccgggcgccattgctggcggtgggagcgccgcccggtctcagcccgccctcggctgctctcctcctccggct	a	ggg	74
PBX2	NM_002586	5HSAR020794	BR403167	161	88	3	c	ggttggggcggagggagcagcggccccagcgagtttggggggagaagtaaccaggcggggggaggggcggagca	a	ggg	74
KIRREL	NM_018240	5HSAR021346	BR404234	298	88	3	c	ctcccgggctcccgggctcccctcctccccagcccgctcctctggctcgctcgccaactccgggccccagccgc	c	ggg	74
ACBD5	NM_145698	5HSAR024709	BR411736	52	88	3	c	gctgtggggagggcacggactgacagacggactccggcggaatggggggtgtggctgctccgccagggtcccca	t	ggg	74
LOC100130155	XM_001720202	5HSAR006180	BR360622	25	89	3	a	gagaggagaggagggagaaggaaatgacagagagagagagagaaaggagagagagaacgcagagggagggaggca	a	ggg	75
LOC100130155	XM_001720219	5HSAR006309	BR361059	25	89	3	a	gagaggagaggagggagaaggaaatgacagagagagagagagaaaggagagagagaacgcagagggagggaggca	a	ggg	75
LOC100130155	XM_001720201	5HSAR006352	BR361229	25	89	3	a	gagaggagaggagggagaaggaaatgacagagagagagagagaaaggagagagagaacgcagagggagggaggca	a	ggg	75
LOC100128997	XM_001721816	5HSAR008706	BR368602	1958	93	4	t	ctgcgcctccagggctcccgggggaccgacgggccctgggagccgggaacgaggaagaggcgggaggcggaagtg	a	gggg	75
LOC100128997	XM_001722206	5HSAR008754	BR368759	1958	93	4	t	ctgcgcctccagggctcccgggggaccgacgggccctgggagccgggaacgaggaagaggcgggaggcggaagtg	a	gggg	75
LOC100128997	XM_001721784	5HSAR008794	BR368880	1958	93	4	t	ctgcgcctccagggctcccgggggaccgacgggccctgggagccgggaacgaggaagaggcgggaggcggaagtg	a	gggg	75
CDC16	NM_003903	5HSAR011000	BR375431	44	89	3	t	gacctgcggccttcgagtccgcggccttcgagtcctggggcggcggcggcggctgcaggcacgggcacgggcacg	c	ggg	75
CDC16	NM_001078645	5HSAR011000	BR375437	44	89	3	t	gacctgcggccttcgagtccgcggccttcgagtcctggggcggcggcggcggctgcaggcacgggcacgggcacg	c	ggg	75
FLJ10404	NM_019057	5HSAR011962	BR378161	357	89	3	c	gttggggatgggccatcctgccgcggctggggtagcagccttcccccgggtccggcgccgaagctttctcccccg	c	ggg	75
NR2F1	NM_005654	5HSAR012533	BR379760	1365	89	3	g	gagcctgagagcctgggggggctgcaaaaagagagaaagaaaacagcaggaaccacaacaaaacgccagcagggc	c	ggg	75
ORAI2	NM_032831	5HSAR017146	BR393743	10	89	3	a	ggccgcgctcggcgccccggccgggccactgggccacaggccacgcggccacgcagtccgagcgggagccgagcc	c	ggg	75
ORAI2	NM_001126340	5HSAR017164	BR393799	10	89	3	a	ggccgcgctcggcgccccggccgggccactgggccacaggccacgcggccacgcagtccgagcgggagccgagcc	c	ggg	75
GEFT	NM_182947	5HSAR017783	BR395691	362	89	3	a	ggggtgtgcgcccggcgccgtccccgccccgccccccgtgattccccctgcatggccggcccgggtggggggcgc	g	ggg	75
CTBP2	NM_001329	5HSAR028348	BR422140	92	89	3	g	ccgcacagccgccgccaccgccaccgccgccgggtggggtgggaggggcgggagacgccgccgccgccgcctcca	t	ggg	75
FAM36A	NM_198076	5HSAR000691	BR346882	268	90	3	c	aggcggcggcgcgtgggggcgggacggggaggggcgcggccagccgggcttctgcttccgcgaccccggcggtgca	c	ggg	76
VPS18	NM_020857	5HSAR001921	BR349598	14	90	3	c	agtcagctgagctgccggggcgaggttgggatcacctggcaccggctgaagggagcctgtgatttttttgtagcgg	c	ggg	76
KCNH4	NM_012285	5HSAR003435	BR352111	131	90	3	g	accgaaacggcgctgagccgagccgagagctacggggttcggagcagaggcagcggcagcggcagcggcagtaaga	a	ggg	76
MXD3	NM_031300	5HSAR018106	BR396654	269	90	3	t	ctgcggctccgtggcgggttccagaggggcggagccaagggctgggcgttcccgcgggcggggcgtcccgggggcg	c	ggg	76
MXD3	NM_001142935	5HSAR018106	BR396657	269	90	3	t	ctgcggctccgtggcgggttccagaggggcggagccaagggctgggcgttcccgcgggcggggcgtcccgggggcg	c	ggg	76
RHOC	NM_175744	5HSAR019093	BR399603	176	90	3	c	ccgagccaagggccgcccccggccgaccctccccctgccgggcccgccctccccgccgcggcgctggaggagggcg	c	ggg	76
RHOC	NM_001042678	5HSAR019098	BR399618	176	90	3	c	ccgagccaagggccgcccccggccgaccctccccctgccgggcccgccctccccgccgcggcgctggaggagggcg	c	ggg	76
CNTNAP5	NM_130773	5HSAR020977	BR403517	257	90	3	t	agggggtcaggctgtgcagaggagagagacagcgagaagaagccgcggctggctactgcgaatttgggattcgatt	a	ggg	76
CBFB	NM_001755	5HSAR021020	BR403600	169	90	3	t	cggtcagtcggtcagcgcggagccagccagcgggtgcccgcgcaagccccgagcgcggccggccggcgcggcctca	c	ggg	76
CBFB	NM_022845	5HSAR021020	BR403619	169	90	3	t	cggtcagtcggtcagcgcggagccagccagcgggtgcccgcgcaagccccgagcgcggccggccggcgcggcctca	c	ggg	76
CDKN2C	NM_001262	5HSAR024365	BR410863	180	90	3	a	agtgaaggaaaaaagcaaaaaagggggcgacacgcaagtgcctgtaggggtgaaaggagcagggaccggcgatcta	g	ggg	76
ZNF837	NM_138466	5HSAR026466	BR416745	43	94	4	c	accagggacccgtgcgggccgcctccagagaatgaggctgccagccttgagagcaccaccgttacctggttgaaga	a	gggg	76
C22orf13	NM_031444	5HSAR000495	BR346532	11	91	3	t	gccactcaacgctgaggcggcgaatggccggagcagacttaaatcaagaggctggggacctctaagatcaaagtttg	c	ggg	77
LOC100131824	XM_001724367	5HSAR004166	BR354192	552	91	3	a	actgcagcaggggagagagggtgggctgcagcagcagaaggcgccttaaaaaacagaagaaaggaaaagcagcctag	a	ggg	77
LOC100131824	XM_001721377	5HSAR004248	BR354448	552	91	3	a	actgcagcaggggagagagggtgggctgcagcagcagaaggcgccttaaaaaacagaagaaaggaaaagcagcctag	a	ggg	77
LOC100131824	XM_001724345	5HSAR004289	BR354577	547	91	3	a	actgcagcaggggagagagggtgggctgcagcagcagaaggcgccttaaaaaacagaagaaaggaaaagcagcctag	a	ggg	77
ITSN1	NM_003024	5HSAR017903	BR396035	47	91	3	a	agcgtagcttggttgctccgtagtacggcggctcgcgaggaagaatcccgagcgggctccgggacggacagagaggc	c	ggg	77
ITSN1	NM_001001132	5HSAR017903	BR396048	47	91	3	a	agcgtagcttggttgctccgtagtacggcggctcgcgaggaagaatcccgagcgggctccgggacggacagagaggc	c	ggg	77
SACM1L	NM_014016	5HSAR022533	BR406490	74	95	4	c	aaaggggtgggaagaggctgggagctgcggccgctgtgccagggtgaccggtagagttgtagccgaggtggcggcgc	c	gggg	77
RTN4	NM_020532	5HSAR026010	BR415410	19	91	3	a	tgagtcacgccaaactgggcggagagtccgctggcctcactcctagctcatctgggcggcggcggcaagtggggaca	c	ggg	77
ATP2A2	NM_001135765	5HSAR030325	BR428144	239	91	3	a	ggctcgggggccgcggcctgccctcccggcgggcggctgagggcgagggaggccctcccttctggcgaggggaggga	t	ggg	77
ATP2A2	NM_170665	5HSAR030325	BR430413	239	91	3	a	ggctcgggggccgcggcctgccctcccggcgggcggctgagggcgagggaggccctcccttctggcgaggggaggga	t	ggg	77
ATP2A2	NM_001681	5HSAR030325	BR430443	239	91	3	a	ggctcgggggccgcggcctgccctcccggcgggcggctgagggcgagggaggccctcccttctggcgaggggaggga	t	ggg	77
C6orf132	XM_941544	5HSAR005469	BR358345	405	92	3	c	gaggacggcgggggacatggcctggtagagtcccctggggagaccgtgctgagttcagtccggggcagggcagggcga	a	ggg	78
C6orf132	XM_001724313	5HSAR005538	BR358574	405	92	3	c	gaggacggcgggggacatggcctggtagagtcccctggggagaccgtgctgagttcagtccggggcagggcagggcga	a	ggg	78
C6orf132	XM_930012	5HSAR005647	BR358947	405	92	3	c	gaggacggcgggggacatggcctggtagagtcccctggggaaaccgtgctgagttcagtccggggcagggcagggcga	a	ggg	78
SPOPL	NM_001001664	5HSAR012672	BR380409	83	92	3	c	agtggcggaggtggccgcccctggcggcgggtttgtttatcccggggaagaagtttaggagcgggagatagggaagga	c	ggg	78
C8orf42	NM_175075	5HSAR014624	BR386033	282	92	3	c	tctggtcttcggaagggtttggggcgggcctggtcctgaggagggcttggagcgggcctggttctggggatggtttgg	c	ggg	78
C8orf42	NM_175075	5HSAR014624	BR386033	310	92	3	c	cctggtcctgaggagggcttggagcgggcctggttctggggatggtttgggggcgggccgggtcctggggagggtttg	c	ggg	78
USP21	NM_012475	5HSAR014715	BR386338	44	92	3	c	accaacaaagatggcggcggcccctgcggcgggagcgatctgggcaacggctgcggctaaagctgcagccgggcccac	g	ggg	78
HEXIM1	NM_006460	5HSAR023382	BR408616	1108	92	3	c	gcgaaaaagcttctatataaaaggggcgcagaggactgggagacagcagttggaagttggcaggtggagaggcaggtt	a	ggg	78
KDM3B	NM_016604	5HSAR027683	BR420133	84	92	3	g	aacggcggccgcgggtggtgcggagggaggccttgcgggcggatcgggcgcttggcggcggaggtggtgggaggcggc	c	ggg	78
FOXA3	NM_004497	5HSAR001256	BR348100	9	93	3	c	cgagggcgggggtgtcccggctataaagcgtggccgcctcccgcggcgctcgggacagccgtaccccgggcggtcggac	c	ggg	79
ARPC4	NM_001024959	5HSAR001351	BR348374	6	93	3	t	aagaaggtgggcctcgagcaaagccgctagaggtggggtgcgggtggtcggcctcaggcgagccccggggcacagcccg	c	ggg	79
ARPC4	NM_005718	5HSAR010379	BR373727	6	93	3	t	aagaaggtgggcctcgagcaaagccgctagaggtggggtgcgggtggtcggcctcaggcgagccccggggcacagcccg	c	ggg	79
UBP1	NM_014517	5HSAR011234	BR376072	213	93	3	c	gcggtcggcggcggctgcagcgctagcggcgcgggggctgggcggcggcgccggcatgaggcgcagggccggtgtccgc	a	ggg	79
UBP1	NM_001128160	5HSAR011234	BR376075	213	93	3	c	gcggtcggcggcggctgcagcgctagcggcgcgggggctgggcggcggcgccggcatgaggcgcagggccggtgtccgc	a	ggg	79
STBD1	NM_003943	5HSAR012214	BR378873	77	93	3	c	gctgggaaagttgagtactggtcgctcagggccgggctccgccggagtgcccggcgcagaaaccgtaaaaggctggagc	c	ggg	79
STX16	NM_003763	5HSAR013200	BR381521	556	93	3	a	gtctctacgccttggcgaagcgcacagctgcatctttttggcttgaggcctgaggccttgtcgagaagcttccgtgaaa	t	ggg	79
STX16	NM_001134772	5HSAR013200	BR381524	556	93	3	a	gtctctacgccttggcgaagcgcacagctgcatctttttggcttgaggcctgaggccttgtcgagaagcttccgtgaaa	t	ggg	79
STX16	NM_001134773	5HSAR013200	BR381531	556	93	3	a	gtctctacgccttggcgaagcgcacagctgcatctttttggcttgaggcctgaggccttgtcgagaagcttccgtgaaa	t	ggg	79
PPFIBP1	NM_003622	5HSAR019904	BR401437	37	93	3	a	ggaggtacctggaactgggagtgatgtcagctcccagctcggtgcctgcccggattcctgacatggtgtagtgcaggca	t	ggg	79
PPFIBP1	NM_177444	5HSAR019904	BR402345	37	93	3	a	ggaggtacctggaactgggagtgatgtcagctcccagctcggtgcctgcccggattcctgacatggtgtagtgcaggca	t	ggg	79
SIRPA	NM_001040023	5HSAR020907	BR403385	77	93	3	c	gagggggggtctccaaaaaccgcggcggcggcggcggccgctccaggcgcccgttccggagtcggggggaggcccagcc	a	ggg	79
STX16	NM_001001433	5HSAR013200	BR420522	556	93	3	a	gtctctacgccttggcgaagcgcacagctgcatctttttggcttgaggcctgaggccttgtcgagaagcttccgtgaaa	t	ggg	79
RAB28	NM_004249	5HSAR029973	BR427063	105	93	3	c	ggtcctgccgcaactacctcccttcctcctctcccccgcccccggagccttcatccttcccttccccccccacctcgag	c	ggg	79
RAB28	NM_001017979	5HSAR029973	BR427065	105	93	3	c	ggtcctgccgcaactacctcccttcctcctctcccccgcccccggagccttcatccttcccttccccccccacctcgag	c	ggg	79
RAB28	NM_001159601	5HSAR029973	BR427078	105	93	3	c	ggtcctgccgcaactacctcccttcctcctctcccccgcccccggagccttcatccttcccttccccccccacctcgag	c	ggg	79
C17orf28	NM_030630	5HSAR011064	BR375601	29	94	3	c	gcgcgccgcttgtctcctgcgagagccgcgggggccgcggagctggagccggagctgaagccggagccgggttggagtct	c	ggg	80
ZFP91	NM_053023	5HSAR012811	BR380723	3	94	3	g	gcgccctcggagccgggcggaggggaggggggaaagaggagcgcagggtgagagtgagccgcaggcttcgggaggcgagg	c	ggg	80
POTEC	NM_001137671	5HSAR016397	BR391373	203	94	3	a	ggggcttggcctttcctggggtgggcgttgggtccccctggtgggcgtgggctttccccgggtgggtgtgggttttccct	t	ggg	80
YY1AP1	NM_139119	5HSAR020175	BR401958	62	94	3	a	ggaggagagaagaggaggtggagaaggcttgggctcgcgccgctgaagtcggcttacccgctggccgcctcctgacaagc	a	ggg	80
NID2	NM_007361	5HSAR020806	BR403190	103	94	3	t	cctggagtcccgccccgcccaggcgcccgcggagatccaggttcgaggctggcgcggcgcggagagtgggctggaggccg	c	ggg	80
SEC63	NM_007214	5HSAR021080	BR403719	55	94	3	c	aactatctcctctcgcgagagctggcgacggcggcggcagcggcagaggtggcggcggcgtgtccgtgagagtggcgtgg	c	ggg	80
S100A2	NM_005978	5HSAR030405	BR428389	64	94	3	t	ctcaggggctgcccttgacctggcctagagccctcccccagctggtggtggagctggcactctctgggagggagggggct	a	ggg	80
PRPF40B	NM_012272	5HSAR000128	BR345813	160	95	3	c	ggaggccatgatggagcctggccgggggcgaaaggtgcgagagtggcgggactgggtgaagagtgggattgggagaggtgg	t	ggg	81
TMEM41B	NM_015012	5HSAR002637	BR350527	18	99	4	c	cactgaagggggcggtccaggaccctgacttgtctcgcggttactgggccggcgcgagcacgcgaggctcgggggcggcac	c	gggg	81
LOC100127940	XM_001720481	5HSAR005702	BR359101	449	95	3	t	acatttccctgcttctggtcctagagtggcccccgtggggctgacagggaggcatcttggtggtgggggggtggggtgcgt	t	ggg	81
LOC100127940	XM_001714084	5HSAR005944	BR359811	449	95	3	t	acatttccctgcttctggtcctagagtggcccccgtggggctgacagggaggcatcttggtggtgggggggtggggtgcgt	t	ggg	81
GALNT5	NM_014568	5HSAR015452	BR388667	135	95	3	a	ggtcactttctggcaactctgctgctgctgctgctgctgctgctacttcagcttcctctccactcaaggtaagcaggctaa	a	ggg	81
PIP4K2B	NM_003559	5HSAR015676	BR389356	300	95	3	a	cggggcgtggggcggacggaaccaccggggcggggtgggaggtaacgggacgggcgcgaccatggcgcggtgagggagcgg	t	ggg	81
HSD17B1	NM_000413	5HSAR022325	BR406127	821	95	3	t	gagagcgggccagggacccgcaggaaggcttatccttgagattgcgtgggagacacaacaaggggtgggggcccgcaggcg	c	ggg	81
NIPAL2	NM_024759	5HSAR024135	BR410270	113	95	3	c	agccaggtggcctcggcgcgcccgcctcgcccgggcaccgagcaggaagtggctgcggcgcggcctcctcgcggtgcaaca	c	ggg	81
CLK2	NM_003993	5HSAR028693	BR423190	64	95	3	c	ggcggtgcgagcggcgccaagcagatcttaggggcggggacggagccggggcgggcgggactgaagcggagcccgggaacg	c	ggg	81
ZNF251	NM_138367	5HSAR003530	BR352377	13	96	3	c	gaagcctgcgtgtgcgcagctcggcccggcccgccctcttcatcctagcccgccccctccccggctctggacccggttctgt	a	ggg	82
LOC650770	XM_001718594	5HSAR009245	BR370430	207	96	3	g	gcttggcctttcctggggtgggcctggggtccccctggtgggcgtgggctttccccgggtgggtgtgggttttccctgggtg	t	ggg	82
SIRPA	NM_001040023	5HSAR020907	BR403385	86	96	3	g	tctccaaaaaccgcggcggcggcggcggccgctccaggcgcccgttccggagtcggggggaggcccagccgggaggggggaa	g	ggg	82
CD2AP	NM_012120	5HSAR021596	BR404726	71	96	3	c	ctccgaggctaggcgggcgctcggggttggagccgagggtctgggcaaaccggtgggtccctccccactgcgggagcggcca	t	ggg	82
AKAP12	NM_144497	5HSAR021656	BR404843	10	96	3	c	gaagtttgcgctcccgaagtcctggagctcagcaagggaggggccagcgccagcccgcgtgtgggtggctgggtgggggcgt	t	ggg	82
ROM1	NM_000327	5HSAR022200	BR405883	298	96	3	c	gtcacaaaacgggccctcggcctaggggcggagtttctcgtaaggggcaaggccaaggcatcttgtattggggctgacaggg	c	ggg	82
WRN	NM_000553	5HSAR029940	BR426972	429	96	3	a	ttgcagcgccgcgagaaaggcgagccgggccgggggcggggaaaggggtggggcaggaacgggggcggggacggcgctggag	c	ggg	82
TRIM7	NM_203296	5HSAR003699	BR352850	336	97	3	c	gcggggaggctcgggcggcagtccccagtctctccttgctggcccatcctgctccaactctcccagccacggggcttcctggt	g	ggg	83
LOC100128600	XM_001715243	5HSAR005707	BR359110	2367	97	3	t	ggagtatgtgtgatgtgtgtgtgtggtgtatgtgtgtgtgtggtgtgtatgtatgtgtgtggtgtgtatgtatgtgagtgggt	t	ggg	83
LOC100134631	XM_001726251	5HSAR005760	BR359231	2367	97	3	t	ggagtatgtgtgatgtgtgtgtgtggtgtatgtgtgtgtgtggtgtgtatgtatgtgtgtggtgtgtatgtatgtgagtgggt	t	ggg	83
LOC100128600	XM_001719441	5HSAR006143	BR360474	2367	97	3	t	ggagtatgtgtgatgtgtgtgtgtggtgtatgtgtgtgtgtggtgtgtatgtatgtgtgtggtgtgtatgtatgtgagtgggt	t	ggg	83
CENPB	NM_001810	5HSAR009460	BR371053	99	97	3	c	gcgcgcgggagaggccgccaggtgccccccgccacgggcccgggccccccgccccggggcggcggcggcggcgccgggccccg	c	ggg	83
EED	NM_003797	5HSAR013598	BR382774	243	97	3	a	cgcgcgcgcgcgcccctttttcagcagtgtggcggggtcgcacgcacgcccgcctcggcggctgggcgcgatttgcgacagtg	g	ggg	83
EED	NM_152991	5HSAR013598	BR382777	243	97	3	a	cgcgcgcgcgcgcccctttttcagcagtgtggcggggtcgcacgcacgcccgcctcggcggctgggcgcgatttgcgacagtg	g	ggg	83
DNPEP	NM_012100	5HSAR015124	BR387645	7	101	4	c	cggcgcggccggggaagcgtgatgaaggcctacgagtgcggcgcggcctgaaggggcacgcgggggacctgcaaagctagtga	c	gggg	83
RAB11FIP2	NM_014904	5HSAR017439	BR394658	78	101	4	c	gctcccttcacccccgcagccctccgcccgggtccgtgtggccaggcctcacgtgccccgcaggcctggggaaggtggagaca	c	gggg	83
WDR13	NM_017883	5HSAR019748	BR401137	230	97	3	a	gcggtgtctgttctgaatcgctgtgtgtcacccgggcgctgcccaggaagggcagggctggggtgatgaccatggtaacaccc	t	ggg	83
ANKS1A	NM_015245	5HSAR021475	BR404486	21	97	3	a	ggtggtgtccccagccggtttggggggtgcgttgcccggagacggaaagtttgggagcccgagcaggctcggctgcagcctcg	a	ggg	83
C12orf75	NM_001145199	5HSAR022813	BR407136	22	97	3	c	gcggggccggggcgaggggtgccgggtggtttccgcccggcagcccgcagcccgctgcgccccgggccgcgtctcccggcggt	a	ggg	83
PRNP	NM_001080123	5HSAR029693	BR426218	14	97	3	t	aggaacgcgggcgggggcaggggagccgcgggggccgagtgaggaccccgggcctcgggtcccaggcgcaagggtgcccggcc	c	ggg	83
CAV2	NM_001233	5HSAR030305	BR428086	207	101	4	c	ctcgggacggccgggctgggagctggagcccacagcgggaagcggccgccgcccgggcctcgcagggctaggcgaggcgaggg	c	gggg	83
CAV2	NM_198212	5HSAR030305	BR428103	207	101	4	c	ctcgggacggccgggctgggagctggagcccacagcgggaagcggccgccgcccgggcctcgcagggctaggcgaggcgaggg	c	gggg	83
TIAF1	NM_004740	5HSAR001494	BR348766	1273	98	3	t	ggctctctcttcttggtgcctgctgtctttctactttttaatttaaatacccaacctctccatcacagctgcatccctgagagt	a	ggg	84
TEX261	NM_144582	5HSAR001682	BR349190	11	98	3	c	gacgcggcggcggcggcggcggtggcggctgtgtgtcgccggagccgaagcgcgcaggcccgtcccggtggccggggagcgggc	t	ggg	84
FAM72D	XM_001128582	5HSAR004351	BR354773	435	98	3	a	gcttaatgctggggaagggatgtcttaaaagaggagaagctttaaattagacgatcggagaaggctgagggaattgctatgaag	c	ggg	84
FAM72B	NM_001100910	5HSAR010190	BR373183	389	98	3	a	gcttaatgctggggaagggatgtcttaaaagaggagaagctttaaattagacgatcggagaaggctgagggaattgctatgaag	c	ggg	84
PATZ1	NM_014323	5HSAR011306	BR376279	311	98	3	c	aggggaggtggcaggcgcgtttgcaggaggggcgcacctcttcgctcgcgcacccccccggaaggtagaccgggaaggggaggc	c	ggg	84
PATZ1	NM_032050	5HSAR011306	BR376284	311	98	3	c	aggggaggtggcaggcgcgtttgcaggaggggcgcacctcttcgctcgcgcacccccccggaaggtagaccgggaaggggaggc	c	ggg	84
PATZ1	NM_032051	5HSAR011306	BR376290	311	98	3	c	aggggaggtggcaggcgcgtttgcaggaggggcgcacctcttcgctcgcgcacccccccggaaggtagaccgggaaggggaggc	c	ggg	84
PATZ1	NM_032052	5HSAR011306	BR376301	311	98	3	c	aggggaggtggcaggcgcgtttgcaggaggggcgcacctcttcgctcgcgcacccccccggaaggtagaccgggaaggggaggc	c	ggg	84
CRKRS	NM_016507	5HSAR020763	BR403106	431	98	3	a	aggaggagcctgggctaccgtccctgccctccccacccccttcccggggcgctttggtgggcgtggagttggggttgggggggt	t	ggg	84
BATF3	NM_018664	5HSAR022000	BR405501	96	102	4	c	ccggcgcgaggccgtgggtgcggcacgaggatgccggcggcgggacagcgcccgtaggcagccccacgggcagggcgcgcgggc	c	gggg	84
RHOQ	NM_012249	5HSAR023319	BR408453	103	98	3	c	gatccgggcggcgaccgcggcggcggcagcgccccgggcccgccgccccctcccctcctgcgaggggagccgctgcatggggcc	g	ggg	84
FUT1	NM_000148	5HSAR023766	BR409450	753	98	3	a	cggacgctgcgagactcccggccgcgccctctccttcctctcctccccaagccctcgctgccagtccggacaggctgcgcggag	a	ggg	84
FAM72D	NM_207418	5HSAR024184	BR410398	409	98	3	a	gcttaatgctggggaagggatgtcttaaaagaggagaagctttaaattagacgatcggagaaggctgagggaattgctatgaag	c	ggg	84
AUTS2	NM_015570	5HSAR027118	BR418723	193	98	3	c	tgaagttcattgcccccacttttcccgcgacctttttcggacccgattttggatcgagttgaggggggcgcgggcgttttcggg	c	ggg	84
AUTS2	NM_001127231	5HSAR027118	BR418733	193	98	3	c	tgaagttcattgcccccacttttcccgcgacctttttcggacccgattttggatcgagttgaggggggcgcgggcgttttcggg	c	ggg	84
AUTS2	NM_001127232	5HSAR027118	BR418742	193	98	3	c	tgaagttcattgcccccacttttcccgcgacctttttcggacccgattttggatcgagttgaggggggcgcgggcgttttcggg	c	ggg	84
RAB28	NM_004249	5HSAR029973	BR427063	11	102	4	c	ccgcgcgcagagggcggggaggtgggcaagatggcgcttgccgagtgattctcctcgaatacctcctgccggcgcggagacacc	c	gggg	84
RAB28	NM_001017979	5HSAR029973	BR427065	11	102	4	c	ccgcgcgcagagggcggggaggtgggcaagatggcgcttgccgagtgattctcctcgaatacctcctgccggcgcggagacacc	c	gggg	84
RAB28	NM_001159601	5HSAR029973	BR427078	11	102	4	c	ccgcgcgcagagggcggggaggtgggcaagatggcgcttgccgagtgattctcctcgaatacctcctgccggcgcggagacacc	c	gggg	84
HSPBP1	NM_012267	5HSAR031091	BR430419	133	98	3	a	gcggggccgagtgcagtatcccgccaggtgagaaggggataagagtcgggcaagcagcttcagccgcaaccacggcacgaagtt	t	ggg	84
POTEB	NM_207355	5HSAR016405	BR391395	116	99	3	a	ggggcttggcctttcctggggtgggcgtggggtccccctggtgggcgtgggctttccccgggtgggtgtgggttttccctgggtg	t	ggg	85
UBE2R2	NM_017811	5HSAR018088	BR396600	404	99	3	c	cccacgggccgtgtggggcctggtctggcccgccgggtgtgtgaagaccggggcccggtgctgcccggccggagggcgagcggag	a	ggg	85
KBTBD2	NM_015483	5HSAR020645	BR402869	134	99	3	a	tgcgaggggaaaccggaaggaagaggcggcggcgccagccttcctcggccggaggcggaggcgagaccccaggcgaggccgcggc	a	ggg	85
KIRREL	NM_018240	5HSAR021346	BR404234	287	99	3	c	cggggggcgggctcccgggctcccgggctcccctcctccccagcccgctcctctggctcgctcgccaactccgggccccagccgc	c	ggg	85
APOBEC3F	NM_145298	5HSAR023145	BR408009	71	99	3	a	ccccagagaaaaccagaaagagggtgagagactgaggaagataaagcgtcccagggcctcctacaccagcgcctgagcaggaagg	a	ggg	85
APOBEC3F	NM_001006666	5HSAR023145	BR408340	71	99	3	a	ccccagagaaaaccagaaagagggtgagagactgaggaagataaagcgtcccagggcctcctacaccagcgcctgagcaggaagg	a	ggg	85
APOBEC3G	NM_021822	5HSAR029445	BR425471	120	99	3	a	ccccagagaaaaccagaaagagggtgagagactgaggaagataaagcgtcccagggcctcctacaccagcgcctgagcaggaagc	a	ggg	85
KIFC1	NM_002263	5HSAR029579	BR425869	84	99	3	a	gtgagaagcataagtggcaccggaagtggaattaatccgcctacctctcctgcgcctgcgaaacagaaaagacaaggcgcctgtc	c	ggg	85
SLC41A3	NM_001008485	5HSAR002189	BR349866	94	100	3	c	gccagggaggcccggccttcccgcttcctgcctgagccgcaggcccgcccctgcgtcctccgcccgcctctttcccgccgccgcct	a	ggg	86
SLC41A3	NM_001008486	5HSAR002189	BR351222	94	100	3	c	gccagggaggcccggccttcccgcttcctgcctgagccgcaggcccgcccctgcgtcctccgcccgcctctttcccgccgccgcct	a	ggg	86
SLC41A3	NM_017836	5HSAR002189	BR374643	94	100	3	c	gccagggaggcccggccttcccgcttcctgcctgagccgcaggcccgcccctgcgtcctccgcccgcctctttcccgccgccgcct	a	ggg	86
ARID1A	NM_139135	5HSAR019982	BR401590	208	104	4	c	gggagaggagcgagcgcagcgcagcagcggagccccgcgaggcccgcccgggcgggtggggagggcagcccgggggactgggcccc	c	gggg	86
ARID1A	NM_006015	5HSAR019982	BR401598	208	104	4	c	gggagaggagcgagcgcagcgcagcagcggagccccgcgaggcccgcccgggcgggtggggagggcagcccgggggactgggcccc	c	gggg	86
EIF6	NM_181468	5HSAR021351	BR404245	28	100	3	a	gtgggggccagaggattcagggccggaggttctggtgggggcccagtgggcgggacccgaggacggaggggccgggaggccgagag	c	ggg	86
PTP4A1	NM_003463	5HSAR021932	BR405375	350	100	3	c	cctccgcccccgcctgtcggctcctggcccgcggttccaggccgcgattggtggctggagggttgcacgtcgcgccggctataaag	a	ggg	86
NSD1	NM_022455	5HSAR028174	BR421617	9	100	3	a	gggtgcggcgagcggccccgctctctccccaccgctccgctcgcaccccagtgtaatgagggtcaccccctccccccagctggccc	a	ggg	86
WRN	NM_000553	5HSAR029940	BR426972	405	100	3	c	gctggatgggctgtggtgggagggttgcagcgccgcgagaaaggcgagccgggccgggggcggggaaaggggtggggcaggaacgg	c	ggg	86
PSD	NM_002779	5HSAR001738	BR349309	189	101	3	c	tcttaggttggcgggagagcccagcggggacctagcgacaaggggggctggcagcctccggggctctgggccctgggagagggcggg	t	ggg	87
MAGIX	NM_001099680	5HSAR003171	BR351469	28	101	3	a	ttcggagaggagttgggttcagtgggacaggcctggggggtcagcagctactgccctgtcttgggtggggccaaggggcgcgacttg	c	ggg	87
LOC730032	XM_001132160	5HSAR004388	BR354896	331	101	3	c	atgatcccggcggcccctgggccgggtctgtggacggctctgctgtgtgcctgtgcgtgcccagtcccgcgggtgaccaaagcccag	c	ggg	87
LOC730032	XM_001132160	5HSAR004388	BR354896	425	101	3	c	cagggcaggagcctggacctcacgtgcctccagtggccaggtttgcgggggcggagcgtccgggcgagggcgcgggggcggacccta	c	ggg	87
LOC730032	XM_001717612	5HSAR004529	BR355357	331	101	3	c	atgatcccggcggcccctgggccgggtctgtggacggctctgctgtgtgcctgtgcgtgcccagtcccgcgggtgaccaaagcccag	c	ggg	87
LOC730032	XM_001717612	5HSAR004529	BR355357	425	101	3	c	cagggcaggagcctggacctcacgtgcctccagtggccaggtttgcgggggcggagcgtccgggcgagggcgcgggggcggacccta	c	ggg	87
LOC730032	XM_001126190	5HSAR004707	BR355924	331	101	3	c	atgatcccggcggcccctgggccgggtctgtggacggctctgctgtgtgcctgtgcgtgcccagtcccgcgggtgaccaaagcccag	c	ggg	87
LOC730032	XM_001126190	5HSAR004707	BR355924	425	101	3	c	cagggcaggagcctggacctcacgtgcctccagtggccaggtttgcgggggcggagcgtccgggtgagggcgcgggggcggacccta	c	ggg	87
RGS9BP	NM_207391	5HSAR009520	BR371229	325	101	3	a	agggatgggccacccacacgtgacctccccgcgtggagccccgcctaccactgatccagggggtggcagctccggccgggacgagcg	t	ggg	87
MEIS3	NM_001009813	5HSAR010831	BR374955	148	101	3	g	gcccagaggagggggcctcgggcgccccgcctgcgcctgctgcccccgccccggcggcgatgcgctcctggccgtgacccccgctgg	c	ggg	87
MEIS3	NM_020160	5HSAR010831	BR374958	148	101	3	g	gcccagaggagggggcctcgggcgccccgcctgcgcctgctgcccccgccccggcggcgatgcgctcctggccgtgacccccgctgg	c	ggg	87
UBP1	NM_014517	5HSAR011234	BR376072	119	101	3	c	cggagggcttgcccccgtgtggtcctcggagcggcccgaggtccagcctcccagcggtcccggaggaggatgcgaccggggggcccc	c	ggg	87
UBP1	NM_001128160	5HSAR011234	BR376075	119	101	3	c	cggagggcttgcccccgtgtggtcctcggagcggcccgaggtccagcctcccagcggtcccggaggaggatgcgaccggggggcccc	c	ggg	87
MESDC1	NM_022566	5HSAR012200	BR378838	418	101	3	a	cgtgccgccgcggcgccgggccgcgctctgtgaaccggcgaggcgggaaggggccgccgtggtgctcggcacgcccgggcgtgtggc	c	ggg	87
KIAA1949	NM_133471	5HSAR016227	BR390969	420	101	3	c	aagctggtgagggcccctggggacagagcggaggaccagtggttggggcgagaagagggcagtcccgcagcgagtcccacgcggggt	a	ggg	87
RUNDC3A	NM_006695	5HSAR018626	BR398198	13	101	3	c	cggctggaggagggggtgacggggccccggctcagcacctcggagagctccctccccggccttgttttgctctggcatcgccgccgg	a	ggg	87
RUNDC3A	NM_001144825	5HSAR018626	BR398201	13	101	3	c	cggctggaggagggggtgacggggccccggctcagcacctcggagagctccctccccggccttgttttgctctggcatcgccgccgg	a	ggg	87
RUNDC3A	NM_001144826	5HSAR018626	BR398204	13	101	3	c	cggctggaggagggggtgacggggccccggctcagcacctcggagagctccctccccggccttgttttgctctggcatcgccgccgg	a	ggg	87
RAB40B	NM_006822	5HSAR019400	BR400449	9	101	3	c	gccggaggcgagcaaggactcggggcccgcgcggcgcctctcggggccgggccgccgcctctgcgctcagccccgcaggccgggcat	t	ggg	87
MSI2	NM_138962	5HSAR022320	BR406117	54	101	3	g	aggaggagggggaggagggagcggagatctcggggctcggagccggccgccgctccgctccgatcgctgtggggcttggttttttgg	t	ggg	87
HSD17B12	NM_016142	5HSAR024730	BR411792	6	101	3	a	gcagtggaactggagtcagctaatggctgacgcactacgcgcagagggaaagacgggtcaccaatagcgacacggatatggccccgc	c	ggg	87
KDM3B	NM_016604	5HSAR027683	BR420133	75	101	3	g	gtgggggggaacggcggccgcgggtggtgcggagggaggccttgcgggcggatcgggcgcttggcggcggaggtggtgggaggcggc	c	ggg	87
SPATA22	NM_032598	5HSAR000855	BR347170	2	102	3	a	aaactgagggcgaaagttgtgtgtcgtgttggcaggagggcctagaagggaaagactgtgcgttgataccaaactgcccccactccgt	c	ggg	88
C1orf2	NM_006589	5HSAR009363	BR370777	395	102	3	a	agcactccgcggtccctccgtgacgcccctcgcttggccccccccacagctggcgtccctcggccatgccccaggggacccagccagg	t	ggg	88
C1orf2	NM_198264	5HSAR009363	BR370780	395	102	3	a	agcactccgcggtccctccgtgacgcccctcgcttggccccccccacagctggcgtccctcggccatgccccaggggacccagccagg	t	ggg	88
FAM105B	NM_138348	5HSAR010604	BR374333	1	102	3	c	ccacggtgacgcgcgcggaagcgctctgcgggccctcggaaaccgccccggcggctgagaggctgcggccactgcctggcaccccgac	a	ggg	88
C20orf201	NM_001007125	5HSAR012912	BR380928	36	102	3	c	agctggggcgcacgttggggccctgccgaggggcgggcagggcccggtgccagccccggcaccgacgggacgccctcctccctccgca	c	ggg	88
NRSN2	NM_024958	5HSAR014020	BR384138	42	106	4	t	ctccatgagggggatggagacctggaaaagggactgacggtgcagcgaggagaggaaggctcggttaagggatgggtcttccacggga	t	gggg	88
PIP4K2B	NM_003559	5HSAR015676	BR389356	290	106	4	c	cgggagggcggggcgtggggcggacggaaccaccggggcggggtgggaggtaacgggacgggcgcgaccatggcgcggtgagggagcg	t	gggg	88
DENND1B	NM_144977	5HSAR017711	BR395475	150	102	3	t	aggcggggaagtgccgggggcgcagccgacatgggcccgccgccacggctgctgtgagcagcctctttccctgtgtggccgccggcgt	c	ggg	88
MXD3	NM_031300	5HSAR018106	BR396654	249	106	4	c	cggctgccggagggtgggctgcggctccgtggcgggttccagaggggcggagccaagggctgggcgttcccgcgggcggggcgtcccg	c	gggg	88
MXD3	NM_001142935	5HSAR018106	BR396657	249	106	4	c	cggctgccggagggtgggctgcggctccgtggcgggttccagaggggcggagccaagggctgggcgttcccgcgggcggggcgtcccg	c	gggg	88
CDKN2D	NM_001800	5HSAR025782	BR414716	39	102	3	c	cgccgggcagggccccgcgggcggccgagggttgggcccggctcccagcccctcgccgtcctccggctgacagggggaggagcccgcc	a	ggg	88
NLE1	NM_001014445	5HSAR002011	BR349688	139	103	3	c	cgaccagactgactcccgccccacttgctcgcgcaggacgaggcggtggcgcgcgatgtgcagcggttgctagtgcagttccaggatga	c	ggg	89
C6orf132	XM_941544	5HSAR005469	BR358345	309	103	3	c	gcccggccaagcggctgccttttacctggccaggtagctcgcatttcccggcaagcggcggcgcccgcagcacctgttgcccggtgcgc	c	ggg	89
C6orf132	XM_001724313	5HSAR005538	BR358574	309	103	3	c	gcccggccaagcggctgccttttacctggccaggtagctcgcatttcccggcaagcggcggcgcccgcagcacctgttgcccggtgcgc	c	ggg	89
C6orf132	XM_930012	5HSAR005647	BR358947	309	103	3	c	gcccggccaagcggctgccttttacctggccaggtagctcgcatttcccggcaagcggcggcgcccgcagcacctgttgcccggtgcgc	c	ggg	89
LOC100134430	XM_001714510	5HSAR006518	BR361785	369	103	3	t	agaaaactttacaggaaggcagaagcaatctctgccgagagagtcagccgagcggccgcgcggagaggaggggcgggcggtccccaggc	c	ggg	89
CCDC109B	NM_017918	5HSAR011812	BR377745	34	103	3	c	agcgcccacagctcggagccaccaggcgctgacgaggagcccggctgagggaggatgcgccgctgacgcctgcgggagccgcgcgcctg	c	ggg	89
ZNF575	NM_174945	5HSAR012106	BR378568	220	103	3	c	gcagctccgctggtccgagggcagtgcagcagcggcgacagcggctgcggccgtggccgtggcgggaggagccggaagccccgcccccg	a	ggg	89
MAPK12	NM_002969	5HSAR014632	BR386061	32	103	3	c	cgagcggacgagcggcgcggagccggcccgaggcgcgcgccgagggagccccgtccccggtcgtgggggcaccgcccgcaggctctgcg	t	ggg	89
PIP4K2B	NM_003559	5HSAR015676	BR389356	161	103	3	c	cggggcggccgctgcctccccgggacgggccgtaccacgcggacggggaggacggggccaggggactgcagggcggctgcaccgcccgg	c	ggg	89
CCNYL1	NM_001142300	5HSAR016439	BR391507	187	103	3	c	cgggcgaaccgcgggcgaggcggcgtctgcttgcgcggtgcagccccagcgtagcccggggctgccggtgccggccgcgccattgttgg	a	ggg	89
NFATC4	NM_004554	5HSAR017082	BR393548	19	103	3	a	tgggggaggacgaggggcgcgtggttttcccatctcatccctggaggaggggctggagcatccccggcagccaatcagggacaggctgg	g	ggg	89
APLP1	NM_001024807	5HSAR019328	BR400302	2	103	3	c	gctggcggcgccggcgcagcccgggggcggcgggaggaggaggtggcggcggtggcgctgggagctcctgtcaccgctggggccgggcc	c	ggg	89
YY1AP1	NM_139119	5HSAR020175	BR401958	53	103	3	c	gagggagggggaggagagaagaggaggtggagaaggcttgggctcgcgccgctgaagtcggcttacccgctggccgcctcctgacaagc	a	ggg	89
BRSK1	NM_032430	5HSAR022532	BR406489	28	103	3	g	ccccgcagcccccctgggccatgctgactcccggggcctgacccccccgggccagccccccctcccccagctccgcggcccgccgactg	g	ggg	89
PEX5	NM_001131025	5HSAR028491	BR422577	145	103	3	c	gctggagcggcagcagggccggggagatgggcggtggggagcgcgggagggaccgggccgagccgggggaagggctccggtgacttaag	a	ggg	89
SLC29A1	NM_001078177	5HSAR031328	BR431149	139	103	3	t	gccccagtgcggagcgtgcggagccgcgcagcacgtggcgcgcacgggccagggagcctgaggaccctgcggggaccgggacccaagct	c	ggg	89
CCDC6	NM_005436	5HSAR011330	BR376347	329	104	3	c	tcccggagctttcagccagctttgctgggcggcctagggagcgcgcccagcccggctggagcgagccccagtgcaatactgcccaagccc	c	ggg	90
ST8SIA5	NM_013305	5HSAR012310	BR379145	218	104	3	a	gccgcctccggctcgtggcacctggcgtctcccctccgcggggaaatcggcggctacccggcaccggcgcctggaggtaaaggtacccgg	t	ggg	90
FAM55C	NM_001134456	5HSAR013073	BR381261	74	104	3	a	gaggcccgggtcgaaggcataggcagaattggagccctgggttgccaaagcgtcgcagctaagaagccggagcccaggctagtaccggcg	c	ggg	90
FAM76B	NM_144664	5HSAR013968	BR383967	107	104	3	t	ctggggcggaagtggaggcggagggagacggtggcgtcgtccgcggggccctgggctctcgcggcgaggccctggtgggcgcgaggcagg	a	ggg	90
TNK2	NM_005781	5HSAR015725	BR389510	49	104	3	c	aggcggtggtcctgggagcggccccggcgccccgaagccgccccgagctggtggggagggcccggccggtggggccccgggggcctgcgg	a	ggg	90
UGP2	NM_001001521	5HSAR017766	BR395639	34	104	3	a	gaggtgtttaggagaaagtaggggctgtgggtgtcgggagccggctgacgggtggacaagggggggttagcagctgggctgcgaccgtta	a	ggg	90
WASF1	NM_003931	5HSAR020915	BR403401	213	108	4	c	ggcaaggatgggaccataggcggaaagagtctcgcggtcccccctgcttctggcgcgggtccctgcgcccggttgtggagcgtctcgcgc	a	gggg	90
WASF1	NM_001024934	5HSAR020921	BR403413	213	108	4	c	ggcaaggatgggaccataggcggaaagagtctcgcggtcccccctgcttctggcgcgggtccctgcgcccggttgtggagcgtctcgcgc	a	gggg	90
WASF1	NM_001024935	5HSAR020927	BR403424	213	108	4	c	ggcaaggatgggaccataggcggaaagagtctcgcggtcccccctgcttctggcgcgggtccctgcgcccggttgtggagcgtctcgcgc	a	gggg	90
MBNL1	NM_021038	5HSAR021531	BR404595	719	104	3	a	cgccggcggaaagttgaagagcgtttttctcgccgccgcgtgcattaggagctcgacgagtccgccctgggcttcctggtggggctgggc	c	ggg	90
MBNL1	NM_207292	5HSAR021531	BR404632	719	104	3	a	cgccggcggaaagttgaagagcgtttttctcgccgccgcgtgcattaggagctcgacgagtccgccctgggcttcctggtggggctgggc	c	ggg	90
KCNJ12	NM_021012	5HSAR022503	BR406460	122	112	5	a	actggcgcggtcagagcctgcgaggaggtgcggggcgccggggcgtaggggagcgcgccgggccctgcccgagatcagataacagccggc	a	ggggg	90
FUT7	NM_004479	5HSAR023791	BR409475	536	104	3	t	ctgtgggggcgtcatattgccctggcttggcatccctcttgtggctgtacccctcccagcagccccaggactagcaagtccccgagatgg	t	ggg	90
PLEKHG4	NM_015432	5HSAR024473	BR411132	573	104	3	a	agggagcagaaggcagtgactcagtgggggtggccctgggacagaactggggaggaagccaaggttggatgatgcttcctgaagccagga	t	ggg	90
NME7	NM_013330	5HSAR026986	BR418337	43	104	3	c	tctgtcgattggatgaacgcagctgagattactcccagccactaaggacgaagaggtggggcggtggcgtcccacgcctcgtgcgacagt	c	ggg	90
