# Supplementary material
Source: HighWire-hosted journal article supplement (doi:10.1101/rna.044578.114)
Supplement: SuppTablesS1-S2.xlsx [file SuppTablesS1-S2.xlsx]

## Sheet: Feuil1
Table S1
Complete 5'-UTR RNA sequences used for in cellulo assays
Candidate	Construct
HIRA	WT	5’-GAUGCGGCUGUGGUGGCGGCGGCGGCGGCCGAGCGCGGGUGGCGGCUGUGGCGGCGGAGGGGGGCGCGGGCCGGCGAUGGCGCGGCGGCCCUGAGGGCGCGGGGCGGGCGGCGGCCGGAGGGCGGGUGGCGCGGGAGGAAGCGGCGGCGGUGGCUCCAUGGCCCGGGCGCGCUGAGGGACCCGGCGCUCGCCUCAGCCCGGCGGCGGCGGCGGCCGAACA-3’
	G/A-mut Central loop	5’-GAUGCGGCUGUGGUGGCGGCGGCGGCGGCCGAGCGCGGGUGGCGGCUGUGGCGGCGGAGGGGGGCGCGGGCCGGCGAUGGCGCGGCGGCCCUGAGGGCGCGGGGCGGGCaaCaaCCaaAGGGCGGGUGGCGCGGGAGGAAGCGGCGGCGGUGGCUCCAUGGCCCGGGCGCGCUGAGGGACCCGGCGCUCGCCUCAGCCCGGCGGCGGCGGCGGCCGAACA-3’
	G/A-mut G-tracks	5’-GAUGCGGCUGUGGUGGCGGCGGCGGCGGCCGAGCGCGGGUGGCGGCUGUGGCGGCGGAGGGGGGCGCGGGCCGGCGAUGGCGCGGCGGCCCUGAGGGCGCGaaGCGaGCGGCGGCCGGAGaGCGaGUGGCGCGGGAGGAAGCGGCGGCGGUGGCUCCAUGGCCCGGGCGCGCUGAGGGACCCGGCGCUCGCCUCAGCCCGGCGGCGGCGGCGGCCGAACA-3’
APC	WT	5’-AGAGCUAGCAGUCUUCCCACCUCCCACAAGAUGGCGGAGGGCAAGUAGCAAGGGGGCGGGGUGUGGCCGCCGGAAGCCUAGCCGCUGCUCGGGGGGGACCUGCGGGCUCAGGCCCGGGAGCUGCGGACCGAGGUUGGCUCGAUGCUGUUCCCAGGUACUGUUGUUGGCUGUUGGUGAGGAAGGUGAAGCACUCAGUUGCCUUCUCGGGCCUCGGCGCCCCCUGCUAGCACUGACU-3'
	G/A-mut G-tracks	5’-AGAGCUAGCAGUCUUCCCACCUCCCACAAGAUGGCGGAGGGCAAGUAGCAAGaGaGCGaaGUGUGGCCGCCGGAAGCCUAGCCGCUGCUCGaGaGaGACCUGCGGGCUCAGGCCCGGGAGCUGCGGACCGAGGUUGGCUCGAUGCUGUUCCCAGGUACUGUUGUUGGCUGUUGGUGAGGAAGGUGAAGCACUCAGUUGCCUUCUCGGGCCUCGGCGCCCCCUGCUAGCACUGACU-3'
TOM1L2	WT	5’-AGAGCUAGCAGAGACGCGGCAAGGGGGCGGGGCCAAAGGCCCUAAGCUCGGCGUUCCAGAGAGUGGGGAGGGGGCAAGUGUCAGUCAGGACGGGAGUCCGGCGGGUUACAGCGGAGGCCUAGGUGGCAGACAGGGGGCCCGGGCCGCUGCGUGUUGUCCACCCAAGGCUAGCACUGACU-3'
	G/A-mut G-tracks	5’-AGAGCUAGCAGAGACGCGGCAAGaGaGCGaaGCCAAAGGCCCUAAGCUCGGCGUUCCAGAGAGUGaaGAGaGaGCAAGUGUCAGUCAGGACGGGAGUCCGGCGGGUUACAGCGGAGGCCUAGGUGGCAGACAGGGGGCCCGGGCCGCUGCGUGUUGUCCACCCAAGGCUAGCACUGACU-3'
MDS1	WT	5’-GCUAGCGAUUGCCAUCUGACAAGAUCUCCAAAUCAAAGUGAUAAAUCGCUCCAAACUUUUUUUGGCGGCGCUGAGAUGUUGGAGGGGCGUCUAGCGCGCAUGUGCGAAGGUGUCCAAACUGACAAUGCUGGAGAGAUAGCGAGUGUGGAUUGAGAGAAAGGGAGAGAGGGAGGGAGAGAGAGUGAAAGAAGAAAAUACAGAGAGUGAGUGUGUGGAAGAGAGAGAGAAACAGGAGAGAAACAGGAGGGAGGGAGAGAGAGAGAGAGAGAGAGAGAGAGAGAGAGAGAGAGAGAGAGAGAGAGAGAGACAGGAGAGAGAGGGAGGGAGCGAGAGGGAGAGCAAAAGAAGGAAAGGAUCCAAGAAAAAAAAGCCCCAACCACACACCAGCGGCUGCAG…
	G/A-mut G-tracks	5’-GCUAGCGAUUGCCAUCUGACAAGAUCUCCAAAUCAAAGUGAUAAAUCGCUCCAAACUUUUUUUGGCGGCGCUGAGAUGUUGGAGGGGCGUCUAGCGCGCAUGUGCGAAGGUGUCCAAACUGACAAUGCUGGAGAGAUAGCGAGUGUGGAUUGAGAGAAAGaGAGAGAGaGAGaGAGAGAGAGUGAAAGAAGAAAAUACAGAGAGUGAGUGUGUGGAAGAGAGAGAGAAACAGGAGAGAAACAGGAGaGAGaGAGAGAGAGAGAGAGAGAGAGAGAGAGAGAGAGAGAGAGAGAGAGAGAGAGAGAGACAGGAGAGAGAGAGAGAGAGCGAGAGGGAGAGCAAAAGAAGGAAAGGAUCCAAGAAAAAAAAGCCCCAACCACACACCAGCGGCUGCAG…
LRRC37A3	WT	5’-GCUAGCUGGGAUUAUAGGCGUGAGCCACUGCACCUGGCACAGGCUGAAGUGCAAUGUUGUGAUCUCGGCUCACUGCAACCUCUGCCUCCCAGGUUCAAGCGAUUCUCCUGCUUUGGCCUCCUGAGUAGCUGGGAUUGCAGGUCAGUUGCUCUCCCUGGAAGGAAGAGUGUUCUCGGAUUUCACCUUAAAGGAGGAAGGCUGCCAGAACUGAACUAGCACUUCUGAAUAUCCUGAGGCGAGGUCCGGUGACUUCCUUGGGAAGCUCUGCCGCGCCCCCAUCCCACCCUACCCCACCCUACCCCACCACAGCAGGCGCUGGAGUCCUGGGACCACCAGGAUCUGAGGCCCAAAUCCUUCCUCACUAAGGGGAGGAGAGGGGUGCUCCGGCAGGGCAGG…
	G/A-mut G-tracks	5’-GCUAGCUGGGAUUAUAGGCGUGAGCCACUGCACCUGGCACAGGCUGAAGUGCAAUGUUGUGAUCUCGGCUCACUGCAACCUCUGCCUCCCAGGUUCAAGCGAUUCUCCUGCUUUGGCCUCCUGAGUAGCUGGGAUUGCAGGUCAGUUGCUCUCCCUGGAAGGAAGAGUGUUCUCGGAUUUCACCUUAAAGGAGGAAGGCUGCCAGAACUGAACUAGCACUUCUGAAUAUCCUGAGGCGAGGUCCGGUGACUUCCUUGGGAAGCUCUGCCGCGCCCCCAUCCCACCCUACCCCACCCUACCCCACCACAGCAGGCGCUGGAGUCCUGGGACCACCAGGAUCUGAGGCCCAAAUCCUUCCUCACUAAGGGGAGGAGAGGGGUGCUCCGGCAGGGCAGG…
Mutated nucleotides are in lowercase
Table S2
List of DNA oligonucleotides used for synthesis of the complete 5'-UTR constructs
Candidate	Name of oligo
	Seq 5UTR pRLTK	5’-GGTCTTACTGACATCCAC-3'
HIRA	Hira 1	5’-GATGCGGCTGTGGTGGCGGCGGCGGCGGCCGAGCGCGGGTGGCGGCTGTGGCGGCGGAGGGGGGCGCGGGCCGGCGATGGCGCGG-3'
	Hira 2 wt	5’-GCCGCTTCCTCCCGCGCCACCCGCCCTCCGGCCGCCGCCCGCCCCGCGCCCTCAGGGCCGCCGCGCCATCGCCGGC-3'
	Hira 2 mut loop	5’-GCCGCTTCCUCCCGCGCCACCCGCCCTTTGGTTGTTGCCCGCCCCGCGCCCTCAGGGCCGCCGCGCCATCGCCGGC-3'
	Hira 2 mut tracks	5’-GCCGCTTCCTCCCGCGCCACTCGCTCTCCGGCCGCCGCTCGCTTCGCGCCCTCAGGGCCGCCGCGCCATCGCCGGC-3'
	Hira 3	5’-TGTTCGGCCGCCGCCGCCGCCGGGCTGAGGCGAGCGCCGGGTCCCTCAGCGCGCCCGGGCCATGGAGCCACCGCCGCCGCTTCCTCCCGCGCC-3'
	Hira Fwd NheI	5’-ATTGCTTAAAGCTAGCGATGCGGCTGTGGTGGCGGC-3'
	Hira Rev NheI	5’-ATTGCTTAAAGCTAGCTGTTCGGCCGCCGCCGCCGC-3'
APC	APC fwd Wt_1	5’-CCTCCCACAAGATGGCGGAGGGCAAGTAGCAAGGGGGCGGGGTGTGGCCGCCGGAAGCCTAGCCGCTGCTCGGGGGGGACCTGCGGGCTCAGGCCCGGG-3’
	APC fwd G/A-mut_1	5’-CCTCCCACAAGATGGCGGAGGGCAAGTAGCAAGAGAGCGAAGTGTGGCCGCCGGAAGCCTAGCCGCTGCTCGAGAGAGACCTGCGGGCTCAGGCCCGGG-3’
	APC rev_1	5'-CTGAGTGCTTCACCTTCCTCACCAACAGCCAACAACAGTACCTGGGAACAGCATCGAGCCAACCTCGGTCCGCAGCTCCCGGGCCTGAGCCCGCAGGTC-3'
	Nhe1_APC fwd_2	5’-AGAGCTAGCAGTCTTCCCACCTCCCACAAGATGGCGGAGGG-3’
	Nhe1_APC rev_2	5'-AGTCAGTGCTAGCAGGGGGCGCCGAGGCCCGAGAAGGCAACTGAGTGCTTCACCTTCC-3'
TOM1L2	TOM1L2 fwd wt	5’-AGAGCTAGCAGAGACGCGGCAAGGGGGCGGGGCCAAAGGCCCTAAGCTCGGCGTTCCAGAGAGTGGGGAGGGGGCAAGTGTCAGTCAGGACGGGAGTCCG-3’
	TOM1L2 fwd G/A-mut	5’-AGAGCTAGCAGAGACGCGGCAAGAGAGCGAAGCCAAAGGCCCTAAGCTCGGCGTTCCAGAGAGTGAAGAGAGAGCAAGTGTCAGTCAGGACGGGAGTCCG-3’
	TOM1L2 rev	5'-AGTCAGTGCTAGCCTTGGGTGGACAACACGCAGCGGCCCGGGCCCCCTGTCTGCCACCTAGGCCTCCGCTGTAACCCGCCGGACTCCCGTCCTGACTGAC-3'
